# Supplementary material
Source: MDPI journal article supplement (https://www.mdpi.com/2073-445X/6/4/68)
Supplement: s1 [file s1]

## Sheet: Connectivity
Rainforest ID	Area (m2)	Longitude (Decimal degrees)	Latitude (Decimal degrees)	Fire activity								Patch Connectivity	Geology
				Early dry season			Late dry season			Total
				Baseline	Project years	Difference (Baseline-project years)	Baseline	Project years	Difference (Baseline-project years)	Baseline	Project years
3506	4500	126.263	-14.2873	0.1	0.5	0.4	0.4	0	-0.15	0.5	0.5	0.00827244	Sandstone
3512	3600	126.16	-14.28	0	0	0	0.3	0	-0.05	0.3	0.25	0.0129269	Sandstone
4903	13500	126.22	-14.0236	0	0	0	0.1	0	-0.1	0.1	0	0.0136295	Basalt
1631	32400	125.808	-14.7348	0.2	0.75	0.55	0.3	0	-0.05	0.4	0.75	0.013768	Laterite
4917	900	126.203	-14.0218	0	0	0	0	0	0	0	0	0.0148077	Basalt
2935	52200	126.021	-14.4232	0	0	0	0.1	0	-0.1	0.1	0	0.0171594	Sandstone
1825	11700	125.857	-14.6564	0.3	0.25	-0.05	0.3	0	-0.3	0.5	0.25	0.0208791	Basalt
2956	900	126.023	-14.3887	0	0.25	0.25	0.1	0	-0.1	0.1	0.25	0.0213023	Basalt
2957	17100	126.03	-14.3891	0	0.25	0.25	0.1	0	-0.1	0.1	0.25	0.0213388	Sandstone
2930	1800	126.128	-14.4238	0	0	0	0.3	0	-0.05	0.3	0.25	0.0227694	Sandstone
1826	7200	125.858	-14.6549	0.3	0.25	-0.05	0.3	0	-0.3	0.5	0.25	0.0236274	Basalt
1689	1800	125.846	-14.7014	0.2	0.5	0.3	0.4	0	-0.15	0.6	0.75	0.0240332	Laterite
5235	5400	126.193	-13.9767	0	0	0	0	0	0	0	0	0.0240844	Laterite
3470	2700	126.151	-14.3209	0.1	0.5	0.4	0.4	0	-0.4	0.5	0.5	0.0242282	Sandstone
3144	1800	126.008	-14.3352	0	0	0	0.1	0	0.15	0.1	0.25	0.0246909	Basalt
5237	3600	126.195	-13.976	0	0	0	0	0	0	0	0	0.025411	Laterite
5236	24300	126.191	-13.9767	0	0	0	0	0	0	0	0	0.0256575	Laterite
3676	900	126.449	-14.3239	0.2	0.75	0.55	0.4	0	-0.4	0.6	0.75	0.0261155	Laterite
2929	900	126.027	-14.425	0	0	0	0	0	0	0	0	0.0274614	Sandstone
3414	5400	126.074	-14.2909	0	0	0	0.2	0	-0.2	0.2	0	0.0288795	Sandstone
342	900	125.091	-15.1156	0	0.25	0.25	0.3	0	-0.3	0.3	0.25	0.028885	Basalt
2141	2700	125.893	-14.6514	0.1	0	-0.1	0.2	0	-0.2	0.3	0	0.0294141	Basalt
3846	7200	126.514	-14.2507	0.2	0.25	0.05	0.3	0	-0.05	0.5	0.5	0.0297767	Basalt
1620	1800	125.871	-14.7431	0.3	0.75	0.45	0.3	0	-0.3	0.6	0.75	0.0304028	Basalt
3363	19800	126.044	-14.3218	0	0	0	0.1	0	-0.1	0.1	0	0.0307394	Basalt
3424	900	126.065	-14.2706	0	0.25	0.25	0.3	0	-0.3	0.3	0.25	0.0307822	Sandstone
1643	24300	125.88	-14.7234	0.3	0.25	-0.05	0.2	0	0.3	0.5	0.75	0.0318358	Basalt
4955	9000	126.193	-14.0089	0	0.25	0.25	0.1	0	-0.1	0.1	0.25	0.0320317	Basalt
1999	900	125.838	-14.6262	0.2	0.25	0.05	0.4	0	-0.15	0.6	0.5	0.0320978	Basalt
3847	9900	126.448	-14.2501	0.3	0.75	0.45	0.4	0	-0.15	0.7	1	0.0321182	Basalt
1634	33300	125.844	-14.732	0.3	0.75	0.45	0.4	0	-0.15	0.6	1	0.0322895	Basalt
1996	900	125.855	-14.6266	0.2	0.25	0.05	0.3	0	-0.3	0.5	0.25	0.0324181	Basalt
2098	900	125.907	-14.6953	0.3	0.25	-0.05	0.2	0	0.05	0.5	0.5	0.0324215	Basalt
143	1800	125.025	-15.1488	0	0	0	0.2	0	-0.2	0.2	0	0.0324324	Basalt
2903	693000	125.979	-14.3806	0	0	0	0	0	0	0	0	0.0324589	Basalt
1550	900	125.5	-14.6664	0	0.25	0.25	0.3	0	-0.05	0.3	0.25	0.0326886	Sandstone
2099	1800	126.011	-14.6937	0.1	0.75	0.65	0.2	0	-0.2	0.3	0.75	0.0327592	Sandstone
1725	12600	125.832	-14.6922	0.3	0.75	0.45	0.4	0	-0.15	0.5	0.75	0.0343338	Basalt
1844	2700	125.837	-14.6491	0.3	0.25	-0.05	0.2	0	0.05	0.5	0.5	0.0347224	Basalt
3607	2700	126.27	-14.2812	0.1	0.5	0.4	0.4	0	-0.4	0.5	0.5	0.0355217	Alluvium and colluvium
1540	5400	125.432	-14.6835	0	0	0	0.4	0	-0.4	0.4	0	0.0358471	Sandstone
4956	13500	126.147	-14.0097	0.1	0.25	0.15	0	0	0	0.1	0.25	0.0375286	Basalt
2107	900	125.911	-14.692	0.3	0	-0.3	0.2	0	0.05	0.5	0.25	0.0375711	Basalt
3850	12600	126.491	-14.2485	0.2	0.25	0.05	0.3	0	0.2	0.5	0.75	0.0379804	Basalt
2931	1800	126.027	-14.4247	0	0	0	0	0	0	0	0	0.0380337	Sandstone
1703	57600	125.88	-14.7003	0.2	0.5	0.3	0.3	0	-0.05	0.5	0.75	0.0384888	Basalt
1654	6300	125.812	-14.7192	0.3	0.5	0.2	0.4	0	-0.15	0.5	0.75	0.0386404	Basalt
141	900	125.08	-15.152	0.1	0.25	0.15	0.3	0	-0.3	0.3	0.25	0.0389405	Basalt
2882	162900	125.843	-14.4672	0.1	0.25	0.15	0.2	0	-0.2	0.3	0.25	0.0396841	Basalt
3347	5400	126.042	-14.3258	0	0	0	0.1	0	0.15	0.1	0.25	0.0398945	Basalt
5211	8100	126.182	-13.9864	0	0	0	0	0	0	0	0	0.0404416	Basalt
3509	51300	126.266	-14.2867	0.1	0.5	0.4	0.4	0	-0.15	0.5	0.5	0.0405526	Sandstone
3508	4500	126.262	-14.2863	0.1	0.5	0.4	0.4	0	-0.15	0.5	0.5	0.0409121	Sandstone
1356	1800	125.926	-14.7708	0.4	0.25	-0.15	0.3	0	-0.05	0.7	0.5	0.04126	Basalt
1562	2700	125.404	-14.6433	0	0.25	0.25	0.1	0	-0.1	0.1	0.25	0.0414712	Sandstone
2086	12600	125.91	-14.7011	0.3	0.25	-0.05	0.2	0	0.05	0.5	0.5	0.0416877	Basalt
1524	3600	125.478	-14.7481	0	0	0	0.2	0	0.05	0.2	0.25	0.0422825	Sandstone
2083	16200	125.905	-14.7036	0.3	0.25	-0.05	0.2	0	0.05	0.5	0.5	0.0423348	Basalt
2928	9000	126.066	-14.4243	0	0	0	0.4	0	-0.15	0.4	0.25	0.0425041	Sandstone
2025	9900	125.854	-14.6227	0.3	0.25	-0.05	0.3	0	-0.3	0.5	0.25	0.0425222	Basalt
3615	1800	126.385	-14.2727	0.1	0	-0.1	0.2	0	-0.2	0.3	0	0.0426227	Sandstone
1262	1800	125.691	-14.749	0.2	0.5	0.3	0.1	0	-0.1	0.3	0.5	0.0431255	Sandstone
3771	1800	126.458	-14.2792	0.2	0.5	0.3	0.4	0	-0.4	0.6	0.5	0.0433476	Laterite
2710	900	126.135	-14.5582	0.1	1	0.9	0.5	0	-0.5	0.6	1	0.0444857	Basalt
1555	1800	125.453	-14.663	0	0.25	0.25	0.3	0	-0.3	0.3	0.25	0.0459918	Sandstone
2021	900	125.877	-14.6225	0.2	0	-0.2	0.3	0	-0.3	0.5	0	0.0460662	Basalt
1081	23400	125.827	-14.8894	0.4	0.25	-0.15	0.4	0	0.1	0.7	0.75	0.0461174	Laterite
4996	5400	126.089	-13.9907	0	0	0	0	0	0	0	0	0.0461794	Basalt
5227	900	126.206	-13.9789	0	0	0	0	0	0	0	0	0.0462927	Laterite
3677	900	126.45	-14.3239	0.2	0.75	0.55	0.4	0	-0.4	0.6	0.75	0.0464953	Laterite
1149	42300	125.406	-14.7665	0.1	0.75	0.65	0.5	0	-0.25	0.6	0.75	0.0467729	Basalt
2888	9900	125.99	-14.4365	0	0	0	0.2	0	-0.2	0.2	0	0.047892	Basalt
4356	900	126.125	-14.0713	0.1	0.25	0.15	0.1	0	-0.1	0.2	0.25	0.047892	Laterite
1735	16200	125.851	-14.6916	0.2	0.5	0.3	0.4	0	-0.15	0.6	0.75	0.0480169	Basalt
2851	1800	125.823	-14.4824	0.1	0.25	0.15	0.1	0	-0.1	0.2	0.25	0.0486513	Basalt
4348	73800	126.012	-14.0756	0	0.25	0.25	0	0	0	0	0.25	0.048874	Basalt
4858	4500	126.149	-14.0307	0.1	0.25	0.15	0.1	0	-0.1	0.2	0.25	0.049102	Laterite
1641	5400	125.882	-14.7234	0.3	0.25	-0.05	0.2	0	0.3	0.5	0.75	0.049396	Basalt
2958	3600	126.034	-14.3886	0	0	0	0.1	0	-0.1	0.1	0	0.0494503	Sandstone
1995	900	125.851	-14.6266	0.3	0.25	-0.05	0.3	0	-0.3	0.5	0.25	0.0496626	Basalt
1824	60300	125.855	-14.6585	0.4	0.25	-0.15	0.3	0	-0.3	0.6	0.25	0.0500327	Basalt
4672	2700	126.2	-14.1072	0	0	0	0.2	0	-0.2	0.2	0	0.0500746	Basalt
381	3600	125.044	-15.1072	0	0.25	0.25	0.2	0	-0.2	0.2	0.25	0.0504315	Basalt
3361	2700	126.09	-14.3209	0.1	0.25	0.15	0.3	0	-0.3	0.4	0.25	0.0506586	Basalt
2163	73800	125.891	-14.6288	0.2	0	-0.2	0.3	0	-0.3	0.5	0	0.0510005	Basalt
1690	900	125.847	-14.7014	0.2	0.5	0.3	0.4	0	-0.15	0.6	0.75	0.0514118	Laterite
1266	6300	125.841	-14.8687	0.3	0.75	0.45	0.5	0	-0.5	0.8	0.75	0.0514477	Laterite
2164	37800	125.896	-14.6306	0.2	0	-0.2	0.3	0	-0.3	0.5	0	0.0515001	Basalt
1624	7200	125.872	-14.7423	0.4	0.75	0.35	0.3	0	-0.05	0.6	1	0.0516236	Basalt
3604	900	126.276	-14.2841	0	0.5	0.5	0.4	0	-0.4	0.4	0.5	0.0520192	Alluvium and colluvium
140	1800	125.08	-15.1523	0.1	0.25	0.15	0.3	0	-0.3	0.3	0.25	0.0523536	Basalt
1979	3600	125.854	-14.63	0.2	0.25	0.05	0.3	0	-0.3	0.5	0.25	0.0523597	Laterite
2855	54900	125.821	-14.4808	0.1	0.25	0.15	0.1	0	-0.1	0.2	0.25	0.0527309	Basalt
3513	900	126.16	-14.2794	0	0	0	0.3	0	-0.05	0.3	0.25	0.0528781	Sandstone
4399	5400	126.096	-14.0612	0	0	0	0	0	0	0	0	0.0531632	Basalt
1385	1800	126.011	-14.7525	0	0.5	0.5	0.5	0	-0.5	0.5	0.5	0.0533814	Sandstone
1368	1800	125.92	-14.7635	0.4	0.25	-0.15	0.3	0	-0.05	0.7	0.5	0.0537651	Basalt
1992	10800	125.875	-14.6281	0.2	0.25	0.05	0.3	0	-0.3	0.5	0.25	0.0538658	Basalt
3423	900	126.092	-14.2706	0.1	0	-0.1	0.3	0	-0.3	0.4	0	0.0539488	Sandstone
4194	900	126.557	-14.188	0	0.5	0.5	0.3	0	-0.3	0.3	0.5	0.053962	Sandstone
4789	2700	126.18	-14.0531	0	0	0	0.1	0	-0.1	0.1	0	0.0540252	Basalt
1384	900	125.934	-14.7535	0.3	0.25	-0.05	0.4	0	0.1	0.7	0.5	0.0541405	Basalt
2723	3600	126.09	-14.5554	0.1	0.5	0.4	0.3	0	-0.05	0.4	0.5	0.054295	Sandstone
4844	2700	126.18	-14.0338	0.1	0.5	0.4	0.1	0	-0.1	0.2	0.5	0.0544093	Basalt
148	2700	125.099	-15.1462	0.1	0.5	0.4	0.3	0	-0.05	0.4	0.75	0.054928	Basalt
2124	1800	125.911	-14.6856	0.3	0	-0.3	0.2	0	0.05	0.5	0.25	0.0549739	Basalt
1980	900	125.867	-14.6297	0.2	0.25	0.05	0.3	0	-0.3	0.5	0.25	0.0553043	Basalt
3647	900	126.468	-14.3509	0.1	0.5	0.4	0.3	0	-0.3	0.4	0.5	0.0553802	Sandstone
1961	2700	125.847	-14.6322	0.3	0.25	-0.05	0.3	0	-0.3	0.5	0.25	0.0557724	Basalt
3501	15300	126.243	-14.2896	0.1	0.5	0.4	0.3	0	-0.05	0.4	0.5	0.0559503	Sandstone
5224	58500	126.216	-13.9797	0	0	0	0	0	0	0	0	0.05635	Laterite
1894	900	125.878	-14.639	0.2	0.25	0.05	0.3	0	-0.3	0.5	0.25	0.0564239	Basalt
3727	12600	126.48	-14.2972	0.2	0.75	0.55	0.3	0	-0.3	0.5	0.75	0.056657	Laterite
4254	11700	126.001	-14.0332	0	0	0	0	0	0	0	0	0.0567662	Basalt
5225	6300	126.177	-13.9798	0	0.25	0.25	0	0	0	0	0.25	0.0571436	Basalt
2854	1800	125.832	-14.48	0.1	0.25	0.15	0.1	0	-0.1	0.2	0.25	0.0573744	Basalt
3510	29700	126.159	-14.2843	0	0	0	0.3	0	-0.05	0.3	0.25	0.0575269	Sandstone
3628	3600	126.396	-14.362	0.1	0.75	0.65	0.4	0	-0.4	0.5	0.75	0.0577149	Laterite
1143	1800	125.255	-14.8119	0.1	0.25	0.15	0.3	0	-0.05	0.3	0.5	0.0578081	Sandstone
1981	6300	125.871	-14.63	0.2	0.25	0.05	0.3	0	-0.3	0.5	0.25	0.0579949	Basalt
2933	5400	126.034	-14.4248	0	0	0	0.2	0	-0.2	0.2	0	0.0586725	Sandstone
3724	9900	126.499	-14.2974	0.2	0.5	0.3	0.3	0	-0.3	0.5	0.5	0.0586805	Basalt
4982	16200	126.03	-13.9946	0	0.25	0.25	0	0	0	0	0.25	0.0591724	Laterite
4839	3600	126.182	-14.0344	0.1	0.5	0.4	0.1	0	-0.1	0.2	0.5	0.0592706	Basalt
3845	9900	126.48	-14.252	0.2	0.5	0.3	0.3	0	-0.05	0.5	0.75	0.059578	Basalt
2738	2700	126.102	-14.5411	0.2	0.25	0.05	0.3	0	-0.05	0.5	0.5	0.0596445	Sandstone
1878	14400	125.847	-14.6429	0.3	0.25	-0.05	0.2	0	-0.2	0.5	0.25	0.0596493	Basalt
1623	1800	125.881	-14.7419	0.4	0.25	-0.15	0.3	0	-0.05	0.6	0.5	0.059929	Basalt
5240	8100	126.138	-13.976	0.1	0	-0.1	0	0	0	0.1	0	0.0601902	Laterite
2739	1800	126.103	-14.541	0.2	0.25	0.05	0.3	0	-0.05	0.5	0.5	0.0602099	Sandstone
1472	900	125.209	-14.6507	0	0	0	0	0	0	0	0	0.0602281	Sandstone
1264	1800	125.689	-14.7471	0.2	0.5	0.3	0.1	0	-0.1	0.3	0.5	0.0603314	Sandstone
1144	16200	125.255	-14.8091	0.1	0.25	0.15	0.3	0	-0.05	0.3	0.5	0.0605319	Sandstone
1619	1475.61	125.869	-14.7435	0.3	0.75	0.45	0.3	0	-0.3	0.6	0.75	0.0608999	Basalt
4252	159300	125.988	-14.038	0	0	0	0	0	0	0	0	0.0610439	Basalt
3714	7200	126.414	-14.3047	0.3	1	0.7	0.3	0	-0.3	0.6	1	0.0612645	Laterite
2760	2700	126.071	-14.5282	0	0.25	0.25	0.3	0	-0.3	0.3	0.25	0.0615684	Sandstone
5212	139500	126.173	-13.9875	0	0.25	0.25	0	0	0	0	0.25	0.0615717	Laterite
3426	900	126.092	-14.2703	0.1	0	-0.1	0.3	0	-0.3	0.4	0	0.0620762	Sandstone
1802	900	125.853	-14.6642	0.5	0.25	-0.25	0.2	0	-0.2	0.6	0.25	0.0621723	Basalt
3756	1800	126.433	-14.2863	0.3	0.75	0.45	0.3	0	-0.3	0.6	0.75	0.0621869	Basalt
1697	900	125.859	-14.6994	0.2	0.25	0.05	0.4	0	-0.15	0.6	0.5	0.0625737	Basalt
2859	3600	125.829	-14.4776	0.1	0.25	0.15	0.1	0	-0.1	0.2	0.25	0.0626401	Basalt
2751	1800	126.09	-14.5354	0.1	0.25	0.15	0.3	0	-0.05	0.4	0.5	0.0627291	Sandstone
1873	1800	125.866	-14.6439	0.2	0.25	0.05	0.3	0	-0.3	0.5	0.25	0.0629886	Basalt
2693	9900	126.116	-14.5694	0.1	0.25	0.15	0.3	0	-0.05	0.4	0.5	0.0632219	Sandstone
3448	2700	126.155	-14.3578	0	0.25	0.25	0.3	0	-0.3	0.3	0.25	0.0635593	Sandstone
2752	900	126.077	-14.5327	0	0.5	0.5	0.3	0	-0.05	0.3	0.75	0.0636155	Sandstone
1363	1800	125.963	-14.7653	0.2	0.5	0.3	0.4	0	-0.15	0.6	0.75	0.0637452	Sandstone
3848	6300	126.461	-14.2499	0.2	0.5	0.3	0.4	0	-0.15	0.6	0.75	0.0641494	Basalt
3667	12600	126.433	-14.3353	0.1	0.75	0.65	0.4	0	-0.4	0.5	0.75	0.0642311	Basalt
1632	13500	125.839	-14.7333	0.3	0.75	0.45	0.4	0	-0.15	0.7	1	0.0642316	Basalt
5209	3600	126.186	-13.9871	0	0	0	0	0	0	0	0	0.0646747	Basalt
4178	1800	126.529	-14.2086	0.2	0.5	0.3	0.4	0	-0.4	0.6	0.5	0.0647114	Basalt
1997	21600	125.814	-14.6274	0.3	0.5	0.2	0.4	0	-0.15	0.7	0.75	0.0647773	Laterite
142	140400	125.118	-15.1516	0.1	0.5	0.4	0.3	0	-0.05	0.4	0.75	0.064838	Sandstone
369	3600	125.022	-15.109	0	0.25	0.25	0.2	0	-0.2	0.2	0.25	0.0651192	Basalt
3852	6300	126.448	-14.2444	0.3	0.5	0.2	0.4	0	-0.15	0.7	0.75	0.0656297	Basalt
4902	90900	126.144	-14.0245	0.1	0.25	0.15	0.1	0	-0.1	0.2	0.25	0.0657141	Basalt
5230	1800	126.177	-13.9788	0	0.25	0.25	0	0	0	0	0.25	0.0657712	Basalt
1644	900	125.863	-14.7218	0.3	0.25	-0.05	0.4	0	-0.15	0.6	0.5	0.06623	Basalt
2746	5400	126.1	-14.5401	0.1	0.25	0.15	0.3	0	-0.05	0.4	0.5	0.0664084	Sandstone
1877	18134.1	125.886	-14.6421	0.2	0	-0.2	0.3	0	-0.3	0.5	0	0.0666139	Basalt
1546	1800	125.437	-14.6709	0	0	0	0.3	0	-0.3	0.3	0	0.0667067	Sandstone
3773	3600	126.504	-14.2784	0.2	0.5	0.3	0.3	0	-0.3	0.5	0.5	0.0667765	Basalt
3511	2700	126.261	-14.2806	0.1	0.5	0.4	0.4	0	-0.15	0.5	0.5	0.0669456	Sandstone
1798	1800	125.863	-14.6653	0.4	0	-0.4	0.2	0	-0.2	0.5	0	0.0669493	Basalt
1734	900	125.841	-14.6912	0.3	0.5	0.2	0.4	0	-0.15	0.6	0.75	0.0669593	Basalt
1722	10800	125.831	-14.6943	0.3	0.75	0.45	0.3	0	-0.05	0.5	0.75	0.0672384	Basalt
3461	2700	126.155	-14.3495	0.1	0.5	0.4	0.4	0	-0.4	0.5	0.5	0.067244	Basalt
2028	900	125.877	-14.6217	0.2	0	-0.2	0.3	0	-0.3	0.5	0	0.0672716	Basalt
4866	900	126.146	-14.0293	0.1	0.25	0.15	0.1	0	-0.1	0.2	0.25	0.0673512	Laterite
4623	9000	126.095	-13.9971	0	0	0	0	0	0	0	0	0.0673819	Basalt
3747	8100	126.432	-14.2904	0.3	0.75	0.45	0.3	0	-0.3	0.6	0.75	0.0675035	Basalt
5223	1800	126.194	-13.9796	0	0	0	0	0	0	0	0	0.0677038	Basalt
3774	27000	0	-14.2792	0.2	0.5	0.3	0.3	0	-0.3	0.5	0.5	0.0677175	Laterite
1628	3600	125.878	-14.7376	0.4	0.25	-0.15	0.2	0	0.3	0.6	0.75	0.0681049	Basalt
4169	3600	126.522	-14.2229	0.2	0.5	0.3	0.4	0	-0.4	0.6	0.5	0.0685542	Basalt
3507	8100	126.159	-14.2888	0	0.25	0.25	0.3	0	-0.3	0.3	0.25	0.0686116	Sandstone
4843	1800	126.154	-14.0341	0.1	0.25	0.15	0.1	0	-0.1	0.2	0.25	0.068748	Laterite
355	1800	125.056	-15.1118	0	0.25	0.25	0.3	0	-0.3	0.3	0.25	0.0689148	Basalt
252	900	125.292	-15.2391	0	0.25	0.25	0.3	0	-0.3	0.3	0.25	0.0693246	Sandstone
4393	12600	126.127	-14.0646	0	0	0	0.1	0	-0.1	0.1	0	0.0694369	Laterite
1242	900	125.688	-14.7629	0.3	0.5	0.2	0.1	0	0.15	0.4	0.5	0.0695126	Sandstone
4842	2700	126.152	-14.0342	0.1	0.25	0.15	0.1	0	-0.1	0.2	0.25	0.0696562	Basalt
1724	1800	125.833	-14.6933	0.3	0.5	0.2	0.4	0	-0.15	0.5	0.75	0.0697258	Basalt
1738	3600	125.831	-14.6907	0.3	0.5	0.2	0.3	0	-0.3	0.5	0.5	0.0701082	Basalt
1285	5400	125.877	-14.7547	0.4	0.5	0.1	0.4	0	-0.15	0.7	0.75	0.0701246	Basalt
370	900	125.046	-15.1087	0	0.25	0.25	0.3	0	-0.3	0.3	0.25	0.0702647	Basalt
2868	7200	125.823	-14.4741	0.1	0.25	0.15	0.1	0	-0.1	0.2	0.25	0.0704027	Basalt
1638	20700	125.872	-14.7294	0.3	0.5	0.2	0.3	0	0.2	0.6	0.75	0.0704998	Basalt
1639	900	125.878	-14.7246	0.3	0.25	-0.05	0.2	0	0.3	0.5	0.75	0.070708	Basalt
356	1800	125.073	-15.1118	0	0.25	0.25	0.3	0	-0.3	0.3	0.25	0.0709022	Basalt
1720	900	125.875	-14.6938	0.2	0.25	0.05	0.2	0	-0.2	0.4	0.25	0.0709416	Basalt
1716	6300	125.852	-14.6953	0.2	0.5	0.3	0.4	0	-0.15	0.6	0.75	0.0711575	Basalt
2131	1800	125.911	-14.6773	0.3	0.25	-0.05	0.1	0	0.15	0.4	0.5	0.0711603	Basalt
1857	900	125.845	-14.6475	0.3	0.25	-0.05	0.2	0	-0.2	0.5	0.25	0.0712928	Laterite
1902	17100	125.829	-14.6384	0.3	0.25	-0.05	0.3	0	-0.05	0.5	0.5	0.0714603	Basalt
4622	4500	126.13	-13.9971	0.1	0	-0.1	0	0	0	0.1	0	0.0716469	Basalt
1848	153900	125.877	-14.6448	0.2	0.25	0.05	0.3	0	-0.3	0.5	0.25	0.0719672	Laterite
3415	1800	126.087	-14.29	0.1	0.25	0.15	0.3	0	-0.3	0.4	0.25	0.0719724	Sandstone
1286	27000	125.879	-14.7546	0.4	0.5	0.1	0.4	0	-0.15	0.7	0.75	0.0719781	Basalt
1251	3600	125.69	-14.7575	0.3	0.5	0.2	0	0	0	0.3	0.5	0.0730425	Sandstone
1847	1800	125.865	-14.6488	0.2	0.25	0.05	0.3	0	-0.3	0.5	0.25	0.0732583	Basalt
359	1800	125.079	-15.1108	0	0.25	0.25	0.3	0	-0.3	0.3	0.25	0.0737089	Basalt
3042	9000	126.489	-14.3962	0.1	1	0.9	0.4	0	-0.4	0.5	1	0.0737306	Sandstone
2147	2700	125.893	-14.6425	0.2	0	-0.2	0.3	0	-0.3	0.5	0	0.0738456	Basalt
674	52200	125.369	-15.107	0	0	0	0	0	0	0	0	0.0738601	Sandstone
3332	26100	126.02	-14.3318	0	0	0	0.1	0	0.15	0.1	0.25	0.0738947	Basalt
1971	900	125.873	-14.6307	0.2	0.25	0.05	0.3	0	-0.3	0.5	0.25	0.0738953	Coastal
2001	900	125.832	-14.626	0.2	0.5	0.3	0.4	0	-0.15	0.6	0.75	0.0740247	Basalt
1702	1800	125.858	-14.6985	0.2	0.5	0.3	0.4	0	-0.15	0.6	0.75	0.0741623	Basalt
2046	2700	125.915	-14.7419	0.5	0.25	-0.25	0.3	0	0.2	0.7	0.75	0.0743353	Basalt
3447	900	126.139	-14.3582	0	0	0	0.3	0	-0.3	0.3	0	0.0743974	Sandstone
2876	1800	125.838	-14.4688	0.1	0.25	0.15	0.2	0	-0.2	0.3	0.25	0.0754318	Basalt
374	1800	125.068	-15.1082	0	0.25	0.25	0.3	0	-0.3	0.3	0.25	0.0754793	Basalt
2123	9900	125.9	-14.6873	0.3	0.25	-0.05	0.3	0	-0.05	0.5	0.5	0.0755289	Basalt
4865	437400	126.214	-14.0337	0	0.25	0.25	0.1	0	-0.1	0.1	0.25	0.0760803	Laterite
2885	581400	125.993	-14.4443	0	0	0	0.1	0	-0.1	0.1	0	0.0762469	Basalt
4157	2700	126.426	-14.1594	0.3	0.25	-0.05	0.4	0	-0.4	0.6	0.25	0.0763074	Sandstone
3326	900	126.078	-14.3314	0.1	0	-0.1	0.2	0	-0.2	0.3	0	0.076345	Sandstone
5176	2700	126.02	-13.928	0	0	0	0.1	0	-0.1	0.1	0	0.0763628	Laterite
1978	1800	125.843	-14.6301	0.2	0.25	0.05	0.2	0	0.05	0.4	0.5	0.0763887	Basalt
3034	8100	126.492	-14.4038	0	0.5	0.5	0.4	0	-0.4	0.4	0.5	0.0764721	Sandstone
4864	27000	126.186	-14.0301	0.1	0.5	0.4	0.1	0	-0.1	0.2	0.5	0.0764825	Basalt
1045	1800	125.67	-14.8949	0.1	0.25	0.15	0.5	0	-0.25	0.6	0.5	0.076489	Basalt
1811	1800	125.827	-14.6623	0.3	0.25	-0.05	0.1	0	0.15	0.4	0.5	0.0766919	Basalt
1627	69300	125.884	-14.7404	0.4	0.25	-0.15	0.2	0	0.3	0.6	0.75	0.0767823	Basalt
4957	1800	126.192	-14.0084	0	0.25	0.25	0.1	0	-0.1	0.1	0.25	0.0768725	Basalt
1800	12600	125.853	-14.6649	0.5	0.25	-0.25	0.3	0	-0.05	0.6	0.5	0.0773528	Basalt
5234	1800	126.143	-13.9775	0.1	0.25	0.15	0	0	0	0.1	0.25	0.0774687	Basalt
5221	81000	126.212	-13.9804	0	0.25	0.25	0	0	0	0	0.25	0.0781759	Laterite
1655	41400	125.816	-14.721	0.3	0.5	0.2	0.5	0	-0.25	0.5	0.75	0.0782371	Basalt
1147	900	125.286	-14.7621	0	0	0	0.1	0	0.15	0.1	0.25	0.0786978	Sandstone
1642	900	125.862	-14.7221	0.3	0.25	-0.05	0.4	0	-0.15	0.6	0.5	0.0787719	Basalt
5232	19800	126.209	-13.978	0	0.25	0.25	0	0	0	0	0.25	0.0788464	Laterite
3442	900	126.115	-14.2464	0	0	0	0.3	0	-0.3	0.3	0	0.0789062	Sandstone
2892	900	126.01	-14.4079	0	0.25	0.25	0.1	0	-0.1	0.1	0.25	0.0789301	Basalt
392	2700	125.099	-15.1044	0	0.25	0.25	0.3	0	-0.05	0.3	0.5	0.0791348	Basalt
1358	1800	125.933	-14.7696	0.4	0.25	-0.15	0.4	0	-0.15	0.7	0.5	0.0793819	Basalt
3349	52200	126.044	-14.3277	0	0	0	0.2	0	0.05	0.2	0.25	0.0793936	Basalt
4280	27900	125.997	-14.0156	0	0	0	0	0	0	0	0	0.0795102	Basalt
2075	6300	125.905	-14.706	0.3	0.25	-0.05	0.2	0	0.05	0.5	0.5	0.0796263	Basalt
3330	10800	126.044	-14.332	0	0	0	0.1	0	0.15	0.1	0.25	0.0797986	Basalt
3260	9900	126.106	-14.3612	0	0.25	0.25	0.3	0	-0.3	0.3	0.25	0.0798424	Sandstone
2743	900	126.101	-14.5405	0.1	0.25	0.15	0.3	0	-0.05	0.4	0.5	0.079897	Sandstone
1955	900	125.823	-14.6326	0.2	0.5	0.3	0.4	0	-0.15	0.6	0.75	0.0806596	Basalt
5233	125100	126.19	-13.9798	0	0	0	0	0	0	0	0	0.08092	Basalt
1952	900	125.843	-14.6329	0.3	0.25	-0.05	0.2	0	0.05	0.5	0.5	0.0813935	Basalt
4984	6300	126.107	-13.9925	0.1	0.25	0.15	0	0	0	0.1	0.25	0.0815077	Laterite
163	1800	125.097	-15.131	0	0.25	0.25	0.3	0	-0.05	0.3	0.5	0.0815949	Basalt
3047	32400	126.503	-14.3934	0.1	1	0.9	0.6	0	-0.6	0.6	1	0.0818197	Sandstone
2927	14400	126.031	-14.4254	0	0	0	0.1	0	-0.1	0.1	0	0.0818546	Sandstone
1563	3600	125.502	-14.637	0	0.25	0.25	0.3	0	0.2	0.3	0.75	0.0818744	Sandstone
382	6300	125.084	-15.1071	0	0.25	0.25	0.3	0	-0.3	0.3	0.25	0.0818807	Basalt
2938	10800	126.028	-14.4049	0	0.25	0.25	0.1	0	-0.1	0.1	0.25	0.0832855	Sandstone
4304	9900	126.021	-14.0903	0	0	0	0	0	0	0	0	0.0834268	Basalt
5168	18000	126.026	-13.9303	0	0	0	0.1	0	-0.1	0.1	0	0.0836245	Basalt
1693	7200	125.859	-14.7005	0.2	0.5	0.3	0.4	0	-0.15	0.6	0.75	0.0836781	Basalt
2745	900	126.104	-14.5402	0.2	0.25	0.05	0.3	0	-0.05	0.5	0.5	0.0841908	Sandstone
4870	18900	126.214	-14.0288	0	0.25	0.25	0.1	0	-0.1	0.1	0.25	0.0842121	Basalt
4871	9900	126.219	-14.028	0	0	0	0.1	0	-0.1	0.1	0	0.084332	Basalt
1780	900	125.828	-14.6767	0.4	0.5	0.1	0.3	0	-0.05	0.5	0.75	0.08434	Basalt
4290	16200	125.986	-14.0089	0	0.25	0.25	0	0	0	0	0.25	0.0847801	Basalt
3365	4500	126.039	-14.321	0	0	0	0.1	0	0.15	0.1	0.25	0.084977	Basalt
266	1800	125.285	-15.2049	0	0.25	0.25	0.3	0	-0.3	0.3	0.25	0.0850477	Sandstone
964	32400	125.389	-14.9468	0	0.25	0.25	0.2	0	-0.2	0.2	0.25	0.0853445	Coastal
3388	18000	126.028	-14.312	0	0	0	0.2	0	0.05	0.2	0.25	0.0856963	Basalt
4282	42300	125.988	-14.0149	0	0	0	0	0	0	0	0	0.0860454	Basalt
4302	423900	126.028	-14.0902	0	0	0	0	0	0	0	0	0.0860725	Laterite
1263	34200	125.637	-14.7501	0.1	0.25	0.15	0.3	0	-0.05	0.3	0.5	0.0860754	Sandstone
2862	900	125.834	-14.4756	0.1	0.25	0.15	0.1	0	-0.1	0.2	0.25	0.086297	Basalt
5229	18900	126.208	-13.979	0	0.25	0.25	0	0	0	0	0.25	0.0866935	Laterite
2087	3600	125.907	-14.701	0.3	0.25	-0.05	0.2	0	0.05	0.5	0.5	0.0875078	Basalt
4556	6300	126.057	-14.0248	0	0	0	0	0	0	0	0	0.0876134	Basalt
2755	900	126.121	-14.5286	0.3	0.5	0.2	0.3	0	-0.05	0.6	0.5	0.08768	Sandstone
3606	187200	126.379	-14.2859	0.3	0.75	0.45	0.4	0	-0.15	0.6	0.75	0.0877604	Sandstone
3730	3600	126.488	-14.2944	0.2	0.5	0.3	0.3	0	-0.3	0.5	0.5	0.0879814	Basalt
2842	5400	125.765	-14.4839	0.2	0.5	0.3	0	0	0	0.2	0.5	0.0881843	Alluvium and colluvium
4293	9000	125.982	-14.0067	0	0.25	0.25	0	0	0	0	0.25	0.0883167	Basalt
5158	3600	126.07	-13.9316	0	0	0	0.1	0	-0.1	0.1	0	0.0888319	Laterite
4251	18900	125.99	-14.0356	0	0	0	0	0	0	0	0	0.0890745	Basalt
1571	3600	125.532	-14.7213	0	0.5	0.5	0.3	0	-0.05	0.3	0.75	0.0892158	Sandstone
1964	900	125.885	-14.6316	0.2	0	-0.2	0.3	0	-0.3	0.5	0	0.0893127	Basalt
3386	1800	126.013	-14.3126	0	0	0	0.1	0	0.15	0.1	0.25	0.0894881	Basalt
2744	900	126.104	-14.5405	0.2	0.25	0.05	0.3	0	-0.05	0.5	0.5	0.0897442	Sandstone
4288	6300	125.981	-14.01	0	0.25	0.25	0	0	0	0	0.25	0.0899703	Basalt
2445	900	125.797	-14.6102	0.5	0.5	0	0.3	0	-0.05	0.7	0.5	0.0902476	Basalt
4640	9900	126.176	-14.1135	0.1	0	-0.1	0.3	0	-0.3	0.4	0	0.0902561	Basalt
3203	3600	126.011	-14.3186	0	0	0	0.1	0	0.15	0.1	0.25	0.0904497	Basalt
2753	900	126.081	-14.5299	0.1	0.25	0.15	0.3	0	-0.05	0.4	0.5	0.0906289	Sandstone
1956	900	125.824	-14.6326	0.2	0.5	0.3	0.4	0	-0.15	0.6	0.75	0.0906715	Basalt
3609	3600	126.378	-14.2763	0.1	0	-0.1	0.4	0	-0.4	0.5	0	0.0908993	Sandstone
3495	15300	126.227	-14.2933	0.1	0.75	0.65	0.5	0	-0.5	0.6	0.75	0.091054	Sandstone
2758	1800	126.081	-14.5285	0.1	0.25	0.15	0.3	0	-0.05	0.4	0.5	0.0915128	Sandstone
2946	2700	126.036	-14.391	0	0	0	0.1	0	-0.1	0.1	0	0.0915313	Sandstone
4694	1800	126.207	-14.1032	0	0.25	0.25	0.2	0	-0.2	0.2	0.25	0.0925049	Basalt
380	1800	125.009	-15.1075	0	0.25	0.25	0.3	0	-0.3	0.3	0.25	0.0926527	Basalt
1554	900	125.454	-14.6631	0	0.25	0.25	0.3	0	-0.3	0.3	0.25	0.0928041	Sandstone
175	8100	125.063	-15.2392	0.2	0.25	0.05	0.2	0	0.3	0.4	0.75	0.0928251	Basalt
1271	900	125.888	-14.8134	0.4	0.5	0.1	0.3	0	0.2	0.6	1	0.0929238	Basalt
3632	900	126.497	-14.36	0.2	0.75	0.55	0.4	0	-0.4	0.6	0.75	0.0931658	Basalt
2757	1800	126.125	-14.5286	0.3	0.5	0.2	0.3	0	-0.3	0.6	0.5	0.0933637	Sandstone
3849	4500	126.472	-14.2488	0.2	0.75	0.55	0.3	0	-0.05	0.5	1	0.0934203	Basalt
3859	10800	126.476	-14.2387	0.2	0.5	0.3	0.3	0	-0.3	0.5	0.5	0.0934877	Basalt
1662	1800	125.859	-14.7136	0.1	0.5	0.4	0.4	0	-0.15	0.5	0.75	0.0935513	Basalt
3721	2700	126.417	-14.3003	0.3	0.75	0.45	0.3	0	-0.3	0.6	0.75	0.0935981	Basalt
3281	1800	126.132	-14.3491	0.1	0	-0.1	0.3	0	-0.05	0.4	0.25	0.0945652	Sandstone
3590	7200	126.282	-14.2966	0	0.5	0.5	0.5	0	-0.5	0.5	0.5	0.0946069	Sandstone
3858	42300	126.462	-14.2406	0.2	0.5	0.3	0.3	0	-0.05	0.5	0.75	0.0949125	Basalt
1483	11700	125.269	-14.727	0.1	0.5	0.4	0.2	0	0.05	0.3	0.75	0.0958967	Sandstone
1491	14400	125.282	-14.7176	0.1	0.25	0.15	0.2	0	0.05	0.3	0.5	0.0959111	Basalt
2878	900	125.851	-14.467	0.1	0.25	0.15	0	0	0	0.1	0.25	0.0965907	Basalt
90	900	125.007	-15.1819	0	0	0	0.2	0	-0.2	0.2	0	0.0966668	Basalt
1076	89100	125.781	-14.9223	0.4	0.5	0.1	0.4	0	0.1	0.7	0.75	0.0967331	Laterite
3856	10800	126.496	-14.2413	0.2	0.5	0.3	0.3	0	0.2	0.5	1	0.0967647	Basalt
5238	1800	126.139	-13.9764	0.1	0	-0.1	0	0	0	0.1	0	0.0971267	Laterite
3044	3600	126.508	-14.3949	0	1	1	0.6	0	-0.6	0.6	1	0.0971402	Sandstone
1633	6300	125.797	-14.7332	0.3	0.5	0.2	0.3	0	-0.05	0.5	0.75	0.0978148	Basalt
1773	4500	125.886	-14.6834	0.2	0	-0.2	0.3	0	-0.3	0.5	0	0.0980382	Basalt
640	1800	125.179	-15.08	0	0	0	0	0	0	0	0	0.098187	Basalt
1314	7200	126.003	-14.8273	0.1	0.5	0.4	0.3	0	-0.3	0.4	0.5	0.0985528	Sandstone
2144	2700	125.954	-14.6472	0.1	0	-0.1	0.1	0	-0.1	0.2	0	0.0986718	Sandstone
2945	2700	126.031	-14.3911	0	0.25	0.25	0.1	0	-0.1	0.1	0.25	0.0988996	Sandstone
444	5400	125.051	-15.0907	0	0.25	0.25	0.3	0	-0.3	0.3	0.25	0.0991129	Laterite
1676	3600	125.827	-14.707	0.2	0.5	0.3	0.4	0	-0.15	0.5	0.75	0.100204	Basalt
1700	3600	125.821	-14.6995	0.3	1	0.7	0.3	0	-0.05	0.5	1	0.100314	Basalt
2085	1800	125.89	-14.7014	0.3	0.5	0.2	0.3	0	-0.05	0.5	0.75	0.100338	Basalt
3354	4500	126.043	-14.3234	0	0	0	0.2	0	0.05	0.2	0.25	0.100463	Basalt
2112	900	125.902	-14.6902	0.3	0.25	-0.05	0.3	0	-0.05	0.5	0.5	0.10052	Basalt
3394	1800	126.022	-14.311	0	0	0	0.1	0	0.15	0.1	0.25	0.100733	Basalt
2934	1800	126.071	-14.4231	0	0	0	0.3	0	-0.05	0.3	0.25	0.100884	Sandstone
1993	17100	125.839	-14.6282	0.2	0.25	0.05	0.4	0	-0.15	0.6	0.5	0.101757	Basalt
1290	2700	125.881	-14.747	0.4	0.25	-0.15	0.3	0	-0.05	0.6	0.5	0.101764	Basalt
3466	1800	126.24	-14.3265	0.1	0.5	0.4	0.4	0	-0.15	0.5	0.5	0.101824	Sandstone
2821	900	125.526	-14.4404	0	0	0	0	0	0	0	0	0.101884	Basalt
1568	56700	125.43	-14.6253	0	0.25	0.25	0.2	0	-0.2	0.2	0.25	0.101904	Basalt
952	14400	125.402	-14.9592	0	0	0	0.1	0	-0.1	0.1	0	0.102135	Sandstone
1991	900	125.85	-14.628	0.3	0.25	-0.05	0.3	0	-0.3	0.5	0.25	0.10214	Basalt
2879	2700	125.838	-14.4669	0.1	0.25	0.15	0.2	0	-0.2	0.3	0.25	0.102274	Basalt
2857	900	125.832	-14.4784	0.1	0.25	0.15	0.1	0	-0.1	0.2	0.25	0.102661	Basalt
4038	107100	126.167	-14.122	0.1	0	-0.1	0.3	0	-0.3	0.4	0	0.10275	Basalt
2156	3600	125.891	-14.6358	0.2	0	-0.2	0.3	0	-0.3	0.5	0	0.103929	Basalt
3357	1800	126.038	-14.3224	0	0	0	0.1	0	0.15	0.1	0.25	0.103989	Basalt
1740	3600	125.768	-14.6907	0.4	0.5	0.1	0.2	0	0.3	0.5	1	0.104069	Basalt
4845	900	126.177	-14.0335	0.1	0.5	0.4	0.1	0	-0.1	0.2	0.5	0.104302	Basalt
1291	1800	125.799	-14.7473	0.4	0.5	0.1	0.4	0	-0.15	0.6	0.75	0.10439	Basalt
69	900	125.007	-15.2053	0	0	0	0.1	0	-0.1	0.1	0	0.104729	Basalt
2111	1800	125.91	-14.6909	0.3	0.25	-0.05	0.2	0	0.05	0.5	0.5	0.104819	Basalt
5140	3600	126.074	-13.941	0	0	0	0.1	0	-0.1	0.1	0	0.104948	Laterite
3380	3600	126.109	-14.3153	0.1	0.25	0.15	0.3	0	-0.3	0.4	0.25	0.105144	Alluvium and colluvium
4899	900	126.221	-14.024	0	0	0	0.1	0	-0.1	0.1	0	0.105176	Basalt
4193	22500	126.555	-14.1895	0	0.5	0.5	0.3	0	-0.3	0.3	0.5	0.10547	Sandstone
3492	11700	126.243	-14.2943	0.1	0.5	0.4	0.4	0	-0.15	0.5	0.5	0.105559	Sandstone
1904	23400	125.885	-14.6379	0.2	0.25	0.05	0.3	0	-0.3	0.5	0.25	0.105666	Basalt
1990	1800	125.85	-14.6282	0.2	0.25	0.05	0.3	0	-0.3	0.5	0.25	0.105706	Basalt
575	3600	125.194	-15.1189	0	0.25	0.25	0	0	0	0	0.25	0.105756	Coastal
1630	6300	125.805	-14.7382	0.3	0.75	0.45	0.2	0	0.05	0.4	0.75	0.105805	Basalt
1988	9000	125.79	-14.6301	0.4	0.5	0.1	0.2	0	0.05	0.6	0.75	0.105965	Laterite
1587	54000	125.736	-14.7235	0.2	0.25	0.05	0.4	0	0.1	0.6	0.75	0.106034	Basalt
2161	900	126.009	-14.6311	0	0	0	0.3	0	-0.05	0.3	0.25	0.106184	Sandstone
1343	1800	125.917	-14.797	0.4	0.5	0.1	0.3	0	-0.05	0.6	0.75	0.106465	Basalt
3857	900	126.476	-14.2406	0.2	0.25	0.05	0.3	0	-0.3	0.5	0.25	0.106504	Basalt
1668	5400	125.857	-14.7108	0.1	0.5	0.4	0.4	0	-0.15	0.5	0.75	0.106732	Basalt
1549	900	125.501	-14.6667	0	0.25	0.25	0.3	0	-0.05	0.3	0.25	0.107041	Sandstone
4959	2700	126.192	-14.0078	0	0.25	0.25	0.1	0	-0.1	0.1	0.25	0.107054	Basalt
1369	11700	125.99	-14.7618	0	0.25	0.25	0.4	0	-0.4	0.4	0.25	0.107564	Sandstone
735	61200	125.456	-15.0231	0	0.25	0.25	0.2	0	0.05	0.2	0.5	0.10789	Sandstone
4429	241200	126.116	-14.0568	0.1	0	-0.1	0.1	0	-0.1	0.2	0	0.108044	Basalt
2883	18000	125.847	-14.4629	0.1	0.25	0.15	0	0	0	0.1	0.25	0.108073	Basalt
3474	1800	126.158	-14.3195	0.1	0.25	0.15	0.4	0	-0.4	0.5	0.25	0.108239	Sandstone
3262	17100	126.136	-14.3603	0	0	0	0.3	0	-0.3	0.3	0	0.108612	Sandstone
3067	18900	125.218	-14.297	0	0	0	0	0	0	0	0	0.108967	Basalt
754	900	125.023	-14.9969	0	0.25	0.25	0.2	0	-0.2	0.2	0.25	0.109695	Basalt
4285	12600	125.982	-14.012	0	0	0	0	0	0	0	0	0.109764	Basalt
1889	1800	125.884	-14.6399	0.2	0	-0.2	0.3	0	-0.3	0.5	0	0.109765	Basalt
2109	3600	125.912	-14.6916	0.3	0	-0.3	0.2	0	0.05	0.5	0.25	0.109867	Basalt
4740	8100	126.161	-14.0797	0	0	0	0	0	0	0	0	0.11003	Basalt
5218	16200	126.219	-13.9841	0	0	0	0	0	0	0	0	0.110122	Basalt
4362	1800	126.1	-14.0708	0.1	0	-0.1	0	0	0	0.1	0	0.110133	Basalt
3600	3600	126.376	-14.29	0.1	0.25	0.15	0.4	0	-0.4	0.5	0.25	0.110428	Sandstone
4396	3600	126.104	-14.063	0.1	0	-0.1	0	0	0	0.1	0	0.110521	Basalt
3499	7200	126.254	-14.2911	0.1	0.25	0.15	0.3	0	-0.05	0.4	0.5	0.110711	Sandstone
3691	1800	126.46	-14.3173	0.1	0.5	0.4	0.4	0	-0.4	0.5	0.5	0.11072	Basalt
2822	23400	125.519	-14.4391	0	0	0	0	0	0	0	0	0.111119	Sandstone
1583	6300	125.657	-14.7322	0.1	0.5	0.4	0.1	0	0.4	0.2	1	0.111334	Sandstone
3472	900	126.156	-14.3198	0.1	0.25	0.15	0.4	0	-0.4	0.5	0.25	0.111525	Sandstone
5167	30600	126.11	-13.9306	0	0	0	0	0	0	0	0	0.111992	Basalt
1500	4500	125.29	-14.6884	0.1	0.25	0.15	0.1	0	0.4	0.2	0.75	0.112124	Sandstone
4259	51300	125.985	-14.0319	0	0.25	0.25	0	0	0	0	0.25	0.112386	Basalt
1965	18900	125.84	-14.6321	0.3	0.25	-0.05	0.3	0	-0.05	0.5	0.5	0.112511	Basalt
1522	900	125.36	-14.663	0	0	0	0.2	0	0.05	0.2	0.25	0.112514	Sandstone
339	2700	125.097	-15.1177	0	0.25	0.25	0.3	0	-0.3	0.3	0.25	0.112521	Basalt
2816	68400	125.52	-14.4471	0	0	0	0	0	0	0	0	0.11253	Basalt
4584	5400	126.094	-14.0168	0	0.25	0.25	0	0	0	0	0.25	0.112891	Basalt
1963	6300	125.867	-14.6313	0.2	0.25	0.05	0.3	0	-0.3	0.5	0.25	0.112951	Basalt
3476	900	126.225	-14.31	0	0.25	0.25	0.1	0	-0.1	0.1	0.25	0.113003	Sandstone
2725	900	126.117	-14.5541	0.1	0.5	0.4	0.3	0	-0.05	0.4	0.75	0.113066	Sandstone
2772	900	126.082	-14.5039	0	0.5	0.5	0.4	0	-0.4	0.4	0.5	0.113107	Sandstone
4346	18000	126.107	-14.073	0.1	0	-0.1	0.1	0	-0.1	0.2	0	0.113107	Basalt
3830	12600	126.424	-14.2589	0.1	0.25	0.15	0.3	0	-0.05	0.4	0.5	0.113367	Basalt
4735	186300	126.199	-14.0857	0	0	0	0.2	0	-0.2	0.2	0	0.113595	Basalt
3548	900	126.337	-14.3496	0	0	0	0.4	0	-0.15	0.4	0.25	0.114046	Sandstone
4255	10800	126.006	-14.0332	0	0	0	0	0	0	0	0	0.114159	Basalt
4900	17100	126.2	-14.0247	0	0.25	0.25	0.1	0	-0.1	0.1	0.25	0.114165	Basalt
978	9000	125.39	-14.9376	0	0.25	0.25	0.2	0	-0.2	0.2	0.25	0.114428	Sandstone
2108	21600	125.911	-14.693	0.3	0.25	-0.05	0.2	0	0.05	0.5	0.5	0.114561	Basalt
309	8100	125.276	-15.1497	0.1	0.25	0.15	0.1	0	0.15	0.2	0.5	0.114652	Sandstone
3323	6300	126.043	-14.3331	0	0	0	0.1	0	0.15	0.1	0.25	0.115009	Basalt
413	11700	125.087	-15.1019	0	0.25	0.25	0.3	0	-0.05	0.3	0.5	0.115302	Basalt
1835	3600	125.835	-14.6508	0.3	0.25	-0.05	0.2	0	0.05	0.5	0.5	0.115744	Basalt
2078	2700	125.888	-14.7051	0.2	0.5	0.3	0.3	0	-0.05	0.5	0.75	0.115775	Basalt
697	126000	125.357	-15.0241	0	0	0	0	0	0	0	0	0.115777	Basalt
3731	900	126.489	-14.294	0.2	0.5	0.3	0.3	0	-0.3	0.5	0.5	0.115832	Basalt
171	900	125.059	-15.1281	0	0.25	0.25	0.3	0	-0.3	0.3	0.25	0.115931	Basalt
2819	14400	125.517	-14.4448	0	0	0	0	0	0	0	0	0.116087	Basalt
1763	72900	125.83	-14.6876	0.3	0.25	-0.05	0.2	0	-0.2	0.5	0.25	0.116113	Basalt
164	900	125.046	-15.1306	0	0.25	0.25	0.3	0	-0.3	0.3	0.25	0.116222	Basalt
3055	13500	126.5	-14.3645	0.2	0.75	0.55	0.4	0	-0.4	0.6	0.75	0.116255	Laterite
1248	9000	125.732	-14.7595	0.3	0.5	0.2	0.1	0	0.4	0.4	1	0.116357	Basalt
1194	3600	125.676	-14.8417	0.1	0	-0.1	0.7	0	-0.45	0.7	0.25	0.116776	Sandstone
4433	900	126.044	-14.0547	0	0	0	0	0	0	0	0	0.117039	Laterite
4345	4500	126.027	-14.0737	0	0	0	0	0	0	0	0	0.117925	Basalt
2777	2700	126.128	-14.4928	0.1	0.5	0.4	0.5	0	-0.25	0.6	0.75	0.118097	Sandstone
4314	6300	126.02	-14.0878	0	0	0	0	0	0	0	0	0.118109	Basalt
698	900	125.362	-15.0156	0	0	0	0	0	0	0	0	0.118162	Sandstone
529	1800	125.058	-15.0514	0	0.25	0.25	0.3	0	-0.3	0.3	0.25	0.118263	Basalt
3350	16200	126.042	-14.3239	0	0	0	0.2	0	0.05	0.2	0.25	0.118271	Basalt
3515	900	126.167	-14.278	0	0	0	0.3	0	-0.05	0.3	0.25	0.118384	Sandstone
2840	4500	125.773	-14.4858	0.2	0.5	0.3	0	0	0	0.2	0.5	0.118532	Sandstone
5040	5400	126.126	-13.9788	0.1	0.25	0.15	0	0	0	0.1	0.25	0.11903	Laterite
4007	22500	126.157	-14.1401	0	0.25	0.25	0.3	0	-0.3	0.3	0.25	0.119203	Laterite
4190	10800	126.554	-14.1916	0	0.5	0.5	0.2	0	-0.2	0.2	0.5	0.119579	Sandstone
155	5400	125.08	-15.1362	0	0	0	0.3	0	-0.3	0.3	0	0.119631	Basalt
2110	4500	126.002	-14.6897	0.1	0.5	0.4	0.2	0	-0.2	0.3	0.5	0.119798	Sandstone
1864	60300	125.842	-14.6443	0.3	0.25	-0.05	0.2	0	0.05	0.5	0.5	0.119839	Basalt
1926	9000	125.834	-14.6362	0.3	0.25	-0.05	0.2	0	0.05	0.5	0.5	0.120158	Basalt
4867	900	126.221	-14.0283	0	0	0	0.1	0	-0.1	0.1	0	0.120404	Basalt
1759	2700	125.855	-14.6876	0.1	0.25	0.15	0.4	0	-0.15	0.5	0.5	0.120406	Basalt
153	2700	125.068	-15.138	0	0.25	0.25	0.3	0	-0.3	0.3	0.25	0.120446	Basalt
1960	3600	125.843	-14.6323	0.2	0.25	0.05	0.2	0	0.05	0.4	0.5	0.120471	Basalt
2029	900	125.827	-14.622	0.3	0.5	0.2	0.4	0	-0.15	0.7	0.75	0.120496	Basalt
2863	3600	125.835	-14.4752	0.1	0.25	0.15	0.1	0	-0.1	0.2	0.25	0.121192	Basalt
1833	900	125.868	-14.6505	0.2	0	-0.2	0.3	0	-0.3	0.5	0	0.121372	Basalt
3348	9900	126.018	-14.3259	0	0	0	0.1	0	0.15	0.1	0.25	0.121934	Basalt
1649	900	125.86	-14.7205	0.3	0.25	-0.05	0.3	0	-0.05	0.5	0.5	0.122072	Basalt
1670	42300	125.878	-14.7073	0.3	0.25	-0.05	0.3	0	0.2	0.5	0.75	0.122074	Basalt
4206	15300	125.701	-14.1215	0	0	0	0	0	0	0	0	0.122211	Basalt
2910	1800	126.028	-14.4433	0	0	0	0.1	0	-0.1	0.1	0	0.122364	Sandstone
2023	3600	125.845	-14.6225	0.2	0.25	0.05	0.2	0	0.05	0.4	0.5	0.123128	Basalt
3710	900	126.48	-14.3061	0.2	0.75	0.55	0.3	0	-0.3	0.5	0.75	0.123574	Basalt
3168	900	126.003	-14.3307	0	0	0	0.1	0	0.15	0.1	0.25	0.124769	Basalt
3057	4500	126.526	-14.3771	0.2	0.25	0.05	0.5	0	-0.25	0.7	0.5	0.125199	Basalt
375	3600	125.051	-15.1082	0	0.25	0.25	0.3	0	-0.3	0.3	0.25	0.125313	Basalt
3464	1800	126.15	-14.3401	0.1	0.5	0.4	0.4	0	-0.4	0.5	0.5	0.12536	Basalt
3125	900	125.657	-14.2671	0.1	0.25	0.15	0	0	0.25	0.1	0.5	0.125755	Sandstone
1171	13500	125.604	-14.7916	0	0.25	0.25	0.5	0	-0.25	0.5	0.5	0.125818	Sandstone
1732	6300	125.878	-14.6914	0.2	0.25	0.05	0.3	0	-0.3	0.5	0.25	0.125997	Basalt
2913	13500	126.031	-14.4346	0	0	0	0	0	0	0	0	0.126035	Sandstone
4803	8100	126.204	-14.0472	0	0.25	0.25	0.1	0	-0.1	0.1	0.25	0.126207	Basalt
1267	47700	125.781	-14.8585	0.5	0.5	0	0.5	0	-0.25	0.8	0.75	0.126597	Laterite
2061	3600	125.904	-14.7296	0.3	0.25	-0.05	0.2	0	0.3	0.5	0.75	0.126704	Basalt
2174	900	126.067	-14.7363	0	0.25	0.25	0.5	0	-0.5	0.5	0.25	0.127436	Sandstone
1838	370800	125.883	-14.6541	0.2	0	-0.2	0.3	0	-0.3	0.5	0	0.127763	Basalt
4612	900	126.122	-14.0039	0	0	0	0	0	0	0	0	0.127886	Basalt
3054	12600	126.5	-14.3674	0.2	0.75	0.55	0.4	0	-0.4	0.6	0.75	0.128204	Laterite
1169	8100	125.583	-14.7954	0	0.5	0.5	0.3	0	-0.3	0.3	0.5	0.128313	Sandstone
1839	900	125.865	-14.6492	0.2	0.25	0.05	0.3	0	-0.3	0.5	0.25	0.128385	Basalt
1261	1800	125.691	-14.7503	0.3	0.75	0.45	0.1	0	-0.1	0.4	0.75	0.128652	Sandstone
3124	3600	125.664	-14.2776	0.1	0.25	0.15	0	0	0.25	0.1	0.5	0.128691	Sandstone
2019	900	125.831	-14.6231	0.2	0.5	0.3	0.4	0	-0.15	0.6	0.75	0.128769	Basalt
5184	900	126.031	-13.9237	0	0	0	0	0	0	0	0	0.128832	Laterite
4566	5400	126.1	-14.0221	0	0	0	0	0	0	0	0	0.128886	Laterite
1541	6300	125.451	-14.6789	0	0	0	0.4	0	-0.15	0.4	0.25	0.129027	Sandstone
1390	3600	125.913	-14.7499	0.4	0.5	0.1	0.4	0	0.1	0.7	0.75	0.129319	Basalt
3324	2700	126.017	-14.3325	0	0	0	0.1	0	0.15	0.1	0.25	0.129329	Basalt
3757	5400	126.514	-14.2845	0.1	0.5	0.4	0.3	0	-0.3	0.4	0.5	0.129805	Basalt
353	1800	125.036	-15.1123	0	0.25	0.25	0.3	0	-0.3	0.3	0.25	0.130169	Basalt
1321	8100	125.985	-14.8231	0.1	1	0.9	0.5	0	-0.5	0.5	1	0.130418	Sandstone
5182	900	126.074	-13.9243	0	0	0	0.1	0	-0.1	0.1	0	0.130504	Basalt
1885	900	125.831	-14.6409	0.3	0.25	-0.05	0.2	0	0.05	0.5	0.5	0.130537	Basalt
2887	10800	125.988	-14.4369	0	0	0	0.2	0	-0.2	0.2	0	0.130744	Basalt
4568	3600	126.07	-14.021	0	0.25	0.25	0	0	0	0	0.25	0.130982	Basalt
2020	7200	125.871	-14.623	0.2	0	-0.2	0.3	0	-0.3	0.5	0	0.131044	Basalt
3758	12600	126.433	-14.2859	0.3	0.75	0.45	0.3	0	-0.3	0.6	0.75	0.131084	Basalt
1645	7200	125.876	-14.7212	0.3	0.25	-0.05	0.1	0	0.4	0.4	0.75	0.131346	Basalt
2048	900	126.005	-14.739	0	0.25	0.25	0.4	0	-0.4	0.4	0.25	0.131676	Sandstone
4436	1800	126.031	-14.0542	0	0	0	0	0	0	0	0	0.131693	Laterite
165	2700	125.047	-15.1302	0	0.25	0.25	0.3	0	-0.3	0.3	0.25	0.132167	Basalt
1629	24300	125.844	-14.7389	0.3	0.75	0.45	0.4	0	-0.15	0.6	1	0.132182	Basalt
3711	2700	126.478	-14.3058	0.2	0.75	0.55	0.3	0	-0.3	0.5	0.75	0.132572	Basalt
357	3600	125.036	-15.1113	0	0.25	0.25	0.3	0	-0.3	0.3	0.25	0.132583	Basalt
4406	3600	126.096	-14.0601	0	0	0	0	0	0	0	0	0.132643	Basalt
344	2700	125.07	-15.1148	0	0.25	0.25	0.3	0	-0.3	0.3	0.25	0.132873	Basalt
322	900	125.075	-15.1241	0	0	0	0.3	0	-0.3	0.3	0	0.13288	Basalt
4263	518400	125.996	-14.0306	0	0.25	0.25	0	0	0	0	0.25	0.132882	Basalt
2765	4500	126.081	-14.5162	0	0.5	0.5	0.3	0	-0.3	0.3	0.5	0.132888	Sandstone
4619	99000	126.105	-13.9995	0.1	0.25	0.15	0	0	0	0.1	0.25	0.132913	Laterite
1612	900	125.683	-14.6319	0.4	0.5	0.1	0.1	0	0.15	0.5	0.75	0.133054	Sandstone
1492	22500	125.275	-14.7139	0.1	0.25	0.15	0.2	0	0.05	0.3	0.5	0.133096	Basalt
4892	900	126.141	-14.0253	0.1	0.25	0.15	0.1	0	-0.1	0.2	0.25	0.133103	Basalt
5109	4500	126.054	-13.9513	0	0	0	0.1	0	-0.1	0.1	0	0.133663	Laterite
946	62100	125.387	-14.9619	0	0.25	0.25	0.1	0	0.15	0.1	0.5	0.133852	Coastal
225	1800	125.129	-15.1459	0	0	0	0.2	0	-0.2	0.2	0	0.133981	Sandstone
2077	9000	125.895	-14.7051	0.3	0.5	0.2	0.2	0	0.05	0.5	0.75	0.134314	Basalt
2079	9900	125.893	-14.7055	0.3	0.5	0.2	0.3	0	-0.05	0.5	0.75	0.134442	Basalt
65	900	125.045	-15.2055	0	0.25	0.25	0.2	0	0.05	0.2	0.5	0.134724	Basalt
1582	900	125.751	-14.733	0.4	0.5	0.1	0.4	0	-0.4	0.6	0.5	0.134884	Basalt
388	20700	125.018	-15.1049	0	0.25	0.25	0.2	0	-0.2	0.2	0.25	0.135511	Basalt
4846	22500	126.178	-14.0345	0.1	0.5	0.4	0.1	0	-0.1	0.2	0.5	0.135853	Basalt
4355	900	126.108	-14.0715	0.1	0	-0.1	0.1	0	-0.1	0.2	0	0.135955	Basalt
2165	900	125.888	-14.6281	0.1	0	-0.1	0.3	0	-0.3	0.4	0	0.135956	Basalt
1672	25200	125.88	-14.7097	0.3	0.5	0.2	0.3	0	0.2	0.5	1	0.136318	Basalt
4677	6300	126.208	-14.1071	0	0	0	0.2	0	-0.2	0.2	0	0.136565	Basalt
455	1800	125.087	-15.0881	0	0.25	0.25	0.3	0	-0.3	0.3	0.25	0.136631	Basalt
1538	1800	125.415	-14.6914	0.1	0	-0.1	0.4	0	-0.4	0.5	0	0.136686	Sandstone
384	11700	125.05	-15.1072	0	0.25	0.25	0.3	0	-0.3	0.3	0.25	0.136858	Basalt
4139	900	126.418	-14.19	0.1	0	-0.1	0.3	0	-0.05	0.4	0.25	0.137014	Sandstone
1253	2700	125.691	-14.757	0.3	0.5	0.2	0	0	0	0.3	0.5	0.137224	Sandstone
4135	21600	126.486	-14.1927	0.1	0.75	0.65	0.5	0	-0.5	0.6	0.75	0.137446	Sandstone
3707	2700	126.41	-14.3075	0.3	1	0.7	0.3	0	-0.3	0.6	1	0.137551	Basalt
2119	11700	125.905	-14.688	0.3	0.25	-0.05	0.2	0	0.05	0.5	0.5	0.13797	Basalt
3719	1800	126.427	-14.3008	0.3	0.5	0.2	0.3	0	-0.3	0.6	0.5	0.138199	Laterite
2150	29700	125.889	-14.6406	0.2	0	-0.2	0.3	0	-0.3	0.5	0	0.138238	Basalt
5148	20700	126.108	-13.9382	0	0	0	0	0	0	0	0	0.138272	Laterite
3208	19800	125.999	-14.3161	0	0	0	0.1	0	-0.1	0.1	0	0.138281	Basalt
4331	186300	126.029	-14.0825	0	0	0	0	0	0	0	0	0.138473	Laterite
428	900	125.089	-15.0928	0	0.25	0.25	0.3	0	-0.3	0.3	0.25	0.139616	Basalt
341	9900	125.055	-15.1163	0	0.25	0.25	0.3	0	-0.3	0.3	0.25	0.139679	Basalt
403	3600	125.013	-15.1034	0	0	0	0.3	0	-0.3	0.3	0	0.139833	Basalt
2846	1800	125.808	-14.4835	0.2	0.5	0.3	0.1	0	-0.1	0.3	0.5	0.140334	Basalt
3525	900	126.15	-14.2646	0.1	0.25	0.15	0.3	0	-0.3	0.4	0.25	0.140373	Sandstone
2185	1800	126.031	-14.7289	0	0.25	0.25	0.5	0	-0.5	0.5	0.25	0.140433	Sandstone
4645	3600	126.173	-14.1125	0.1	0	-0.1	0.3	0	-0.3	0.4	0	0.140744	Basalt
5199	5400	126.084	-13.9107	0	0	0	0.1	0	-0.1	0.1	0	0.141118	Laterite
517	1800	125.035	-15.0578	0	0.25	0.25	0.3	0	-0.3	0.3	0.25	0.141152	Basalt
4307	4500	126.033	-14.0903	0	0	0	0	0	0	0	0	0.141226	Basalt
3715	1800	126.42	-14.3033	0.3	1	0.7	0.3	0	-0.3	0.6	1	0.14128	Laterite
303	1800	125.261	-15.1633	0.1	0.25	0.15	0.2	0	-0.2	0.3	0.25	0.141437	Sandstone
1657	68400	125.879	-14.7194	0.3	0.25	-0.05	0.3	0	0.2	0.5	0.75	0.141663	Basalt
298	3600	125.287	-15.174	0	0.25	0.25	0.1	0	-0.1	0.1	0.25	0.141864	Sandstone
1985	2700	125.837	-14.6294	0.2	0.25	0.05	0.4	0	-0.15	0.6	0.5	0.142357	Basalt
2038	1800	125.844	-14.6207	0.2	0.25	0.05	0.2	0	0.05	0.4	0.5	0.142898	Basalt
360	2700	125.103	-15.1107	0	0	0	0.3	0	-0.05	0.3	0.25	0.143083	Basalt
1865	7200	125.869	-14.6447	0.2	0	-0.2	0.3	0	-0.3	0.5	0	0.143121	Basalt
4261	8100	125.984	-14.0286	0	0.25	0.25	0	0	0	0	0.25	0.143136	Laterite
2735	2700	126.026	-14.549	0.1	0.75	0.65	0.7	0	-0.2	0.7	1	0.143413	Coastal
4192	6300	126.557	-14.1903	0	0.5	0.5	0.3	0	-0.3	0.3	0.5	0.143451	Sandstone
316	10800	125.264	-15.13	0.1	0	-0.1	0.1	0	0.15	0.2	0.25	0.143719	Sandstone
2850	1800	125.766	-14.4828	0.2	0.5	0.3	0	0	0	0.2	0.5	0.143862	Alluvium and colluvium
1256	900	125.633	-14.7555	0	0.25	0.25	0.2	0	0.05	0.2	0.5	0.143883	Sandstone
4382	8100	126.126	-14.0664	0.1	0	-0.1	0.1	0	-0.1	0.2	0	0.144115	Laterite
1618	900	125.885	-14.7443	0.4	0.25	-0.15	0.3	0	-0.05	0.6	0.5	0.144251	Basalt
431	900	125.086	-15.092	0	0.25	0.25	0.3	0	-0.3	0.3	0.25	0.144261	Basalt
4599	597600	126.055	-14.0167	0	0.25	0.25	0	0	0	0	0.25	0.144775	Basalt
401	900	125.1	-15.1033	0	0	0	0.3	0	-0.05	0.3	0.25	0.145105	Basalt
4400	10800	126.016	-14.0628	0	0	0	0	0	0	0	0	0.145337	Basalt
2129	6300	125.888	-14.6825	0.2	0.25	0.05	0.3	0	-0.3	0.5	0.25	0.145522	Basalt
3716	2700	126.415	-14.3032	0.3	0.75	0.45	0.3	0	-0.3	0.6	0.75	0.145587	Basalt
426	45000	125.121	-15.0946	0	0	0	0.3	0	-0.05	0.3	0.25	0.145791	Sandstone
3371	27900	126.089	-14.3179	0.1	0.25	0.15	0.3	0	-0.05	0.4	0.5	0.145974	Sandstone
2599	1800	126.087	-14.6151	0.1	0.25	0.15	0.5	0	-0.25	0.5	0.5	0.146162	Sandstone
1078	11700	125.816	-14.8946	0.6	0.25	-0.35	0.5	0	0	0.9	0.75	0.146562	Basalt
970	5400	125.386	-14.9415	0	0.25	0.25	0.2	0	-0.2	0.2	0.25	0.14689	Sandstone
4021	111600	126.167	-14.1312	0.1	0.25	0.15	0.3	0	-0.3	0.4	0.25	0.147045	Basalt
1292	900	125.865	-14.7465	0.3	0.75	0.45	0.3	0	-0.3	0.6	0.75	0.147191	Basalt
5057	54000	126.087	-13.9696	0	0.25	0.25	0	0	0	0	0.25	0.148011	Basalt
677	106200	125.375	-15.1041	0	0	0	0	0	0	0	0	0.14807	Sandstone
135	85500	125.031	-15.1587	0	0	0	0.2	0	-0.2	0.2	0	0.148124	Basalt
2750	21600	126.105	-14.5369	0.2	0.5	0.3	0.4	0	-0.15	0.6	0.5	0.148176	Sandstone
4915	5400	126.174	-14.0227	0	0.25	0.25	0.1	0	-0.1	0.1	0.25	0.14818	Basalt
1951	1800	125.822	-14.6332	0.2	0.5	0.3	0.4	0	-0.15	0.6	0.75	0.148339	Basalt
1651	9900	125.874	-14.7208	0.4	0.25	-0.15	0.3	0	-0.05	0.6	0.5	0.148372	Basalt
1127	900	125.321	-14.8415	0	0	0	0.3	0	-0.05	0.3	0.25	0.148469	Sandstone
4770	13500	126.147	-14.0688	0	0	0	0.1	0	-0.1	0.1	0	0.148528	Basalt
2682	3600	126.054	-14.5749	0	0.75	0.75	0.6	0	-0.35	0.6	0.75	0.148618	Coastal
4023	11700	126.169	-14.1289	0.1	0	-0.1	0.3	0	-0.3	0.4	0	0.148632	Basalt
832	900	125.274	-14.9561	0	0	0	0.1	0	0.15	0.1	0.25	0.149465	Sandstone
1908	6300	125.834	-14.6379	0.3	0.25	-0.05	0.2	0	0.05	0.5	0.5	0.149606	Basalt
129	48600	125.068	-15.1588	0.1	0	-0.1	0.2	0	-0.2	0.3	0	0.149675	Basalt
5186	900	126.032	-13.9234	0	0	0	0.1	0	-0.1	0.1	0	0.149855	Laterite
4363	4500	126.116	-14.0708	0.1	0	-0.1	0.1	0	-0.1	0.2	0	0.15018	Basalt
2170	900	126.095	-14.7408	0.1	0.75	0.65	0.7	0	-0.7	0.8	0.75	0.150455	Sandstone
3855	7200	126.492	-14.2418	0.2	0.5	0.3	0.3	0	0.2	0.5	1	0.150492	Basalt
3481	2700	126.224	-14.3049	0	0	0	0.3	0	-0.3	0.3	0	0.150515	Sandstone
1970	900	125.885	-14.6308	0.2	0	-0.2	0.3	0	-0.3	0.5	0	0.150606	Basalt
2932	1800	126.026	-14.4245	0	0	0	0.1	0	-0.1	0.1	0	0.151432	Sandstone
2084	2700	125.917	-14.7018	0.3	0.25	-0.05	0.2	0	0.05	0.5	0.5	0.151818	Basalt
4401	5400	126.104	-14.0612	0.1	0	-0.1	0	0	0	0.1	0	0.151891	Basalt
3282	4500	126.133	-14.3489	0.1	0	-0.1	0.3	0	-0.05	0.4	0.25	0.15192	Sandstone
394	900	125.049	-15.1046	0	0.25	0.25	0.2	0	-0.2	0.2	0.25	0.152071	Basalt
3463	900	126.15	-14.3405	0.1	0.5	0.4	0.4	0	-0.4	0.5	0.5	0.152135	Basalt
1974	2700	125.767	-14.6313	0.4	0.25	-0.15	0.2	0	0.05	0.6	0.5	0.152373	Basalt
3491	27900	126.253	-14.2941	0.1	0.25	0.15	0.3	0	-0.05	0.4	0.5	0.152656	Sandstone
1968	1800	125.871	-14.6314	0.2	0.25	0.05	0.3	0	-0.3	0.5	0.25	0.152694	Basalt
4262	18000	125.983	-14.0288	0	0.25	0.25	0	0	0	0	0.25	0.152913	Basalt
2916	3600	126.033	-14.4329	0	0	0	0.1	0	-0.1	0.1	0	0.153536	Sandstone
3480	35100	126.165	-14.3068	0.1	0.5	0.4	0.4	0	-0.4	0.5	0.5	0.153722	Sandstone
2140	900	125.89	-14.6519	0.2	0	-0.2	0.2	0	-0.2	0.4	0	0.153753	Basalt
4531	3600	126.05	-14.0322	0	0.25	0.25	0	0	0	0	0.25	0.153816	Basalt
1692	15300	125.833	-14.7016	0.3	0.5	0.2	0.4	0	-0.15	0.5	0.75	0.153933	Basalt
4965	18000	126.146	-14.0055	0	0.25	0.25	0	0	0	0	0.25	0.154058	Laterite
2597	900	126.124	-14.6155	0.2	0.5	0.3	0.5	0	-0.5	0.7	0.5	0.154182	Sandstone
5213	4500	126.182	-13.9857	0	0	0	0	0	0	0	0	0.154634	Basalt
144	10800	125.083	-15.149	0.1	0	-0.1	0.3	0	-0.3	0.3	0	0.155133	Basalt
2045	3600	125.917	-14.7431	0.3	0.25	-0.05	0.4	0	0.1	0.6	0.75	0.155467	Basalt
2050	900	126.012	-14.7376	0	0.25	0.25	0.6	0	-0.6	0.6	0.25	0.15593	Sandstone
5141	31500	126.112	-13.9415	0	0	0	0	0	0	0	0	0.156073	Basalt
3479	900	126.17	-14.3085	0.1	0.25	0.15	0.4	0	-0.4	0.5	0.25	0.156416	Sandstone
1425	7200	126.111	-14.7657	0	0.75	0.75	0.6	0	-0.6	0.6	0.75	0.156669	Sandstone
2031	5400	125.856	-14.6215	0.2	0	-0.2	0.3	0	-0.3	0.5	0	0.156725	Basalt
1751	6300	125.808	-14.6894	0.3	0.5	0.2	0.2	0	0.05	0.5	0.75	0.158109	Basalt
3782	900	126.489	-14.2767	0.2	0.75	0.55	0.3	0	-0.3	0.5	0.75	0.158206	Basalt
4857	32400	126.189	-14.0308	0.1	0.5	0.4	0.1	0	-0.1	0.2	0.5	0.158335	Laterite
652	1800	125.186	-15.0668	0	0	0	0	0	0	0	0	0.158592	Sandstone
4360	900	126.125	-14.0707	0.1	0.25	0.15	0.1	0	-0.1	0.2	0.25	0.158695	Laterite
305	1800	125.258	-15.1573	0.1	0.25	0.15	0.2	0	-0.2	0.3	0.25	0.158877	Sandstone
3605	4500	126.27	-14.282	0.1	0.5	0.4	0.4	0	-0.4	0.5	0.5	0.159032	Basalt
387	4500	125.011	-15.1059	0	0	0	0.3	0	-0.3	0.3	0	0.159091	Basalt
1786	37800	125.838	-14.6747	0.5	0.25	-0.25	0.2	0	0.05	0.6	0.5	0.159152	Basalt
4249	75600	126.005	-14.0369	0	0	0	0	0	0	0	0	0.159261	Basalt
4600	38700	126.104	-14.0101	0	0	0	0	0	0	0	0	0.159299	Laterite
3681	5400	126.451	-14.3217	0.1	0.75	0.65	0.4	0	-0.4	0.5	0.75	0.159396	Laterite
2704	27900	126.142	-14.5624	0.1	0.75	0.65	0.5	0	-0.25	0.6	0.75	0.159545	Basalt
551	54000	125.056	-15.0265	0	0.25	0.25	0.3	0	-0.3	0.3	0.25	0.15965	Basalt
3322	12600	126.021	-14.3345	0	0	0	0.1	0	-0.1	0.1	0	0.159854	Basalt
878	900	125.323	-14.8976	0	0.25	0.25	0.2	0	-0.2	0.2	0.25	0.159934	Sandstone
3853	4500	126.492	-14.2435	0.2	0.25	0.05	0.3	0	0.2	0.5	0.75	0.160374	Basalt
3842	3600	126.452	-14.2531	0.2	0.75	0.55	0.4	0	-0.15	0.6	1	0.160568	Basalt
1650	900	125.871	-14.7204	0.4	0.25	-0.15	0.3	0	-0.05	0.6	0.5	0.161123	Basalt
4997	2700	126.123	-13.9908	0.1	0.25	0.15	0	0	0	0.1	0.25	0.161237	Basalt
3851	4500	126.491	-14.2459	0.2	0.25	0.05	0.3	0	0.2	0.5	0.75	0.161563	Basalt
3121	1800	125.64	-14.3515	0.1	0.5	0.4	0	0	0	0.1	0.5	0.1616	Sandstone
2870	1800	125.825	-14.4734	0.1	0.25	0.15	0.1	0	-0.1	0.2	0.25	0.161789	Basalt
3441	4500	126.072	-14.2474	0	0.25	0.25	0.3	0	-0.3	0.3	0.25	0.161831	Sandstone
1111	2700	125.204	-14.7727	0	0.25	0.25	0.1	0	0.4	0.1	0.75	0.16253	Sandstone
1110	7200	125.19	-14.7736	0	0.25	0.25	0	0	0.25	0	0.5	0.163627	Sandstone
1749	11700	125.842	-14.6881	0.3	0.75	0.45	0.4	0	-0.15	0.6	0.75	0.163641	Basalt
1228	900	125.638	-14.7779	0.1	0	-0.1	0.2	0	0.05	0.2	0.25	0.164015	Sandstone
1463	8100	125.224	-14.6854	0	0.5	0.5	0.1	0	-0.1	0.1	0.5	0.164282	Basalt
3618	900	126.369	-14.2703	0.1	0.5	0.4	0.4	0	-0.15	0.5	0.5	0.164695	Sandstone
4227	900	126.002	-14.0498	0	0	0	0	0	0	0	0	0.164708	Basalt
5170	26100	126.023	-13.93	0	0	0	0.1	0	-0.1	0.1	0	0.164715	Basalt
362	900	125.017	-15.1108	0	0.25	0.25	0.2	0	-0.2	0.2	0.25	0.165213	Basalt
4330	900	126.078	-14.0795	0	0.25	0.25	0	0	0	0	0.25	0.165341	Basalt
294	2700	125.326	-15.1808	0	0	0	0.2	0	-0.2	0.2	0	0.165504	Sandstone
4799	9900	126.166	-14.0482	0.1	0.5	0.4	0.1	0	-0.1	0.2	0.5	0.165532	Laterite
5013	900	126.123	-13.9897	0.1	0.25	0.15	0	0	0	0.1	0.25	0.165753	Basalt
1525	2700	125.478	-14.7471	0	0	0	0.2	0	0.05	0.2	0.25	0.165881	Sandstone
473	900	125.051	-15.0772	0	0.25	0.25	0.3	0	-0.3	0.3	0.25	0.166244	Basalt
5074	145600	126.07	-13.9617	0	0.5	0.5	0.1	0	-0.1	0.1	0.5	0.166985	Basalt
1191	2700	125.639	-14.8478	0.1	0.25	0.15	0.6	0	-0.35	0.7	0.5	0.167768	Sandstone
3068	15300	125.22	-14.296	0	0	0	0	0	0	0	0	0.167993	Basalt
5169	39600	126.038	-13.9305	0	0	0	0.1	0	-0.1	0.1	0	0.168138	Laterite
3994	6300	126.156	-14.1733	0.1	0.25	0.15	0.3	0	-0.3	0.4	0.25	0.168345	Sandstone
4607	900	126.12	-14.0066	0	0	0	0	0	0	0	0	0.168631	Basalt
395	900	125.083	-15.1043	0	0.25	0.25	0.3	0	-0.3	0.3	0.25	0.169017	Basalt
1784	900	125.823	-14.6746	0.4	0.5	0.1	0.3	0	-0.05	0.6	0.75	0.16902	Basalt
2139	7200	125.997	-14.652	0.1	0	-0.1	0.1	0	0.15	0.2	0.25	0.169329	Sandstone
70	900	125.039	-15.205	0	0.25	0.25	0.2	0	-0.2	0.2	0.25	0.169962	Basalt
3053	1800	126.505	-14.3675	0.2	0.75	0.55	0.4	0	-0.4	0.6	0.75	0.170211	Basalt
2260	1800	126.063	-14.6438	0	0.25	0.25	0.4	0	-0.15	0.4	0.5	0.170339	Sandstone
2606	900	126.071	-14.613	0	0.25	0.25	0.5	0	-0.25	0.5	0.5	0.171131	Sandstone
2034	1800	125.817	-14.6213	0.3	0.5	0.2	0.4	0	-0.15	0.7	0.75	0.17114	Basalt
3035	2700	126.494	-14.4036	0	0.5	0.5	0.3	0	-0.3	0.3	0.5	0.171192	Sandstone
1553	4500	125.432	-14.6639	0	0.25	0.25	0.3	0	-0.3	0.3	0.25	0.171805	Sandstone
4545	2700	126.032	-14.0306	0	0	0	0	0	0	0	0	0.171854	Basalt
161	1800	125.08	-15.1323	0	0	0	0.3	0	-0.3	0.3	0	0.172233	Basalt
5059	1800	0	-13.9687	0	0	0	0	0	0	0	0	0.172336	Basalt
731	1800	125.447	-15.0276	0	0.25	0.25	0.2	0	-0.2	0.2	0.25	0.172437	Coastal
4998	5400	126.033	-13.9918	0	0.25	0.25	0	0	0	0	0.25	0.172449	Basalt
422	68400	125.039	-15.0976	0	0.25	0.25	0.3	0	-0.3	0.3	0.25	0.172867	Basalt
2008	55800	125.834	-14.6224	0.2	0.5	0.3	0.4	0	-0.15	0.6	0.75	0.173054	Basalt
3421	3600	126.071	-14.2715	0.1	0.25	0.15	0.3	0	-0.3	0.4	0.25	0.17386	Sandstone
1737	20700	125.853	-14.6913	0.2	0.5	0.3	0.4	0	-0.15	0.6	0.75	0.173891	Basalt
409	79200	125.041	-15.1033	0	0.25	0.25	0.3	0	-0.3	0.3	0.25	0.174016	Basalt
1309	75561.1	125.977	-14.8377	0.3	1	0.7	0.8	0	-0.55	0.9	1	0.174113	Sandstone
3194	900	126.005	-14.3221	0	0	0	0.1	0	0.15	0.1	0.25	0.174394	Basalt
1333	16200	125.891	-14.8052	0.5	0.5	0	0.3	0	-0.05	0.7	0.75	0.174437	Basalt
4620	2700	126.1	-13.9987	0.1	0.25	0.15	0	0	0	0.1	0.25	0.174614	Laterite
1758	4500	125.767	-14.6883	0.4	0.5	0.1	0.2	0	0.05	0.5	0.75	0.175258	Basalt
2122	1800	126.015	-14.6866	0.1	0.75	0.65	0.2	0	-0.2	0.3	0.75	0.175361	Sandstone
2392	7200	125.859	-14.6192	0.3	0	-0.3	0.3	0	-0.3	0.5	0	0.175493	Basalt
470	81900	125.052	-15.078	0	0.25	0.25	0.3	0	-0.3	0.3	0.25	0.175686	Basalt
4605	5400	126.117	-14.0076	0	0	0	0	0	0	0	0	0.175727	Basalt
5139	1800	126.109	-13.9413	0	0	0	0	0	0	0	0	0.17617	Laterite
1162	15300	125.622	-14.8006	0	0.25	0.25	0.5	0	-0.25	0.5	0.5	0.176311	Sandstone
4475	4500	126.044	-14.0464	0	0	0	0	0	0	0	0	0.17661	Laterite
133	900	125.04	-15.157	0	0	0	0.2	0	-0.2	0.2	0	0.176653	Basalt
2267	900	126.126	-14.6363	0.2	0.5	0.3	0.3	0	-0.3	0.5	0.5	0.176708	Sandstone
3608	2700	126.272	-14.2808	0.1	0.5	0.4	0.4	0	-0.4	0.5	0.5	0.176783	Alluvium and colluvium
1277	2700	125.876	-14.8057	0.4	0.5	0.1	0.2	0	0.05	0.6	0.75	0.177661	Basalt
1306	900	126.013	-14.8529	0.2	0.5	0.3	0.4	0	-0.4	0.6	0.5	0.177703	Sandstone
4874	10800	126.202	-14.028	0	0.25	0.25	0.1	0	-0.1	0.1	0.25	0.178261	Basalt
671	79200	125.364	-15.1089	0	0	0	0	0	0	0	0	0.178379	Sandstone
3799	24300	126.482	-14.2739	0.2	0.5	0.3	0.3	0	-0.3	0.5	0.5	0.178403	Laterite
3387	900	126.019	-14.3124	0	0	0	0.1	0	0.15	0.1	0.25	0.178428	Basalt
1682	900	125.861	-14.7045	0.1	0.5	0.4	0.4	0	-0.15	0.5	0.75	0.178689	Basalt
2828	3600	125.802	-14.494	0.2	0.5	0.3	0.2	0	-0.2	0.4	0.5	0.179026	Basalt
5239	15300	126.183	-13.9759	0	0.25	0.25	0	0	0	0	0.25	0.179177	Basalt
2764	4500	126.063	-14.5169	0	0.25	0.25	0.3	0	-0.3	0.3	0.25	0.179203	Sandstone
4054	1800	126.273	-14.2111	0	0	0	0	0	0	0	0	0.179229	Sandstone
1380	2700	126.013	-14.7532	0	0.5	0.5	0.5	0	-0.5	0.5	0.5	0.179245	Sandstone
662	5400	125.126	-15.0571	0	0	0	0.2	0	-0.2	0.2	0	0.179326	Basalt
4071	900	126.497	-14.233	0.2	0.5	0.3	0.3	0	-0.05	0.5	0.75	0.179331	Laterite
4248	11700	125.978	-14.0366	0	0.25	0.25	0	0	0	0	0.25	0.179523	Basalt
3483	900	126.159	-14.3035	0.1	0.5	0.4	0.4	0	-0.4	0.5	0.5	0.17982	Sandstone
828	1800	125.303	-14.9616	0.1	0	-0.1	0.1	0	-0.1	0.2	0	0.181014	Sandstone
2814	900	125.605	-14.456	0	0.25	0.25	0	0	0	0	0.25	0.181254	Sandstone
3660	4500	126.467	-14.3438	0.2	0.75	0.55	0.4	0	-0.4	0.6	0.75	0.181406	Sandstone
4002	2700	126.168	-14.1544	0.1	0.5	0.4	0.3	0	-0.3	0.4	0.5	0.181451	Sandstone
3459	900	126.142	-14.3495	0.1	0	-0.1	0.2	0	0.05	0.3	0.25	0.181462	Sandstone
2137	6300	126.006	-14.6576	0.2	0.5	0.3	0.2	0	0.05	0.3	0.75	0.181563	Sandstone
5131	900	126.06	-13.9442	0	0	0	0.1	0	-0.1	0.1	0	0.181899	Laterite
5187	900	126.03	-13.9232	0	0	0	0	0	0	0	0	0.181978	Laterite
1754	9900	125.875	-14.6881	0.2	0.25	0.05	0.2	0	-0.2	0.4	0.25	0.182015	Basalt
4104	1800	126.496	-14.2219	0.2	0.5	0.3	0.3	0	-0.3	0.5	0.5	0.182553	Basalt
377	59400	125.033	-15.11	0	0.25	0.25	0.3	0	-0.3	0.3	0.25	0.182816	Basalt
3940	16200	125.704	-14.1379	0	0	0	0	0	0	0	0	0.18299	Basalt
4391	900	126.132	-14.0644	0	0.25	0.25	0.1	0	-0.1	0.1	0.25	0.183484	Laterite
119	1800	125.023	-15.1639	0	0	0	0.1	0	-0.1	0.1	0	0.183912	Coastal
3141	20700	126.011	-14.3362	0	0	0	0.1	0	0.15	0.1	0.25	0.184094	Basalt
2000	900	125.828	-14.6261	0.2	0.5	0.3	0.4	0	-0.15	0.6	0.75	0.184483	Basalt
1381	900	126.012	-14.753	0	0.5	0.5	0.5	0	-0.5	0.5	0.5	0.184714	Sandstone
4516	5400	126.052	-14.0353	0	0	0	0	0	0	0	0	0.184778	Basalt
4068	12600	126.466	-14.2349	0.2	0.75	0.55	0.3	0	-0.05	0.5	1	0.185201	Laterite
1939	15300	125.82	-14.6348	0.3	0.5	0.2	0.4	0	-0.15	0.6	0.75	0.185301	Basalt
4472	1800	126.117	-14.0459	0	0	0	0	0	0	0	0	0.18544	Basalt
1586	3600	125.759	-14.7258	0.2	0.5	0.3	0.3	0	0.2	0.5	0.75	0.185899	Basalt
5162	105300	126.021	-13.9344	0	0	0	0.1	0	-0.1	0.1	0	0.185947	Basalt
217	2700	125.216	-15.1529	0.1	0	-0.1	0.2	0	0.05	0.3	0.25	0.185949	Sandstone
2866	11700	125.837	-14.4745	0.1	0.25	0.15	0.1	0	-0.1	0.2	0.25	0.186012	Basalt
13	7200	125.056	-15.2474	0.1	0	-0.1	0.2	0	0.05	0.3	0.25	0.186423	Basalt
1984	8100	125.82	-14.6288	0.3	0.5	0.2	0.4	0	-0.15	0.7	0.75	0.186434	Basalt
490	1800	125.043	-15.0684	0	0.25	0.25	0.3	0	-0.3	0.3	0.25	0.186536	Basalt
2155	7200	125.95	-14.6366	0.1	0	-0.1	0.1	0	0.15	0.2	0.25	0.186637	Sandstone
1736	1800	125.877	-14.6905	0.2	0.25	0.05	0.3	0	-0.3	0.5	0.25	0.18677	Basalt
149	900	125.09	-15.1446	0.1	0	-0.1	0.3	0	-0.05	0.4	0.25	0.187106	Sandstone
1998	2700	125.827	-14.6265	0.2	0.5	0.3	0.4	0	-0.15	0.6	0.75	0.187342	Basalt
1565	8100	125.412	-14.6293	0	0.5	0.5	0.1	0	-0.1	0.1	0.5	0.187468	Sandstone
1787	20700	125.852	-14.6738	0.3	0.25	-0.05	0.2	0	0.05	0.5	0.5	0.187469	Basalt
4419	76500	126.127	-14.0602	0	0	0	0.1	0	-0.1	0.1	0	0.187805	Basalt
3519	4500	126.161	-14.2734	0	0	0	0.3	0	-0.05	0.3	0.25	0.187919	Sandstone
1066	57600	125.77	-14.9457	0.6	0.5	-0.1	0.4	1	0.35	0.9	0.75	0.188001	Basalt
1341	1800	125.891	-14.7998	0.4	0.75	0.35	0.3	0	-0.05	0.6	0.75	0.188289	Basalt
885	900	125.344	-14.8892	0.1	0.25	0.15	0.3	0	-0.05	0.4	0.5	0.188602	Alluvium and colluvium
1065	42300	125.811	-14.9487	0.3	0.5	0.2	0.4	0	0.1	0.7	0.5	0.189051	Laterite
3597	25200	126.279	-14.2946	0	0.5	0.5	0.5	0	-0.25	0.5	0.5	0.189355	Sandstone
3746	900	126.512	-14.2888	0.1	0.5	0.4	0.3	0	-0.3	0.4	0.5	0.189418	Basalt
4390	18000	126.085	-14.0656	0	0	0	0	0	0	0	0	0.189532	Laterite
2785	12600	126.145	-14.5615	0.1	0.25	0.15	0.5	0	-0.25	0.6	0.5	0.189546	Basalt
1332	3600	125.895	-14.8076	0.4	0.5	0.1	0.3	0	-0.05	0.6	0.75	0.189605	Basalt
3427	900	126.069	-14.2703	0.1	0.25	0.15	0.3	0	-0.3	0.4	0.25	0.189892	Sandstone
3425	900	126.069	-14.2706	0.1	0.25	0.15	0.3	0	-0.3	0.4	0.25	0.190084	Sandstone
4407	5400	126.042	-14.0607	0	0.5	0.5	0	0	0	0	0.5	0.1904	Laterite
4423	900	126.042	-14.0572	0	0.25	0.25	0	0	0	0	0.25	0.1905	Laterite
1868	900	125.882	-14.6444	0.2	0	-0.2	0.3	0	-0.3	0.5	0	0.190624	Basalt
4967	8100	126.362	-14.0497	0.1	0.25	0.15	0.1	0	-0.1	0.2	0.25	0.190822	Sandstone
1681	3600	125.84	-14.7045	0.2	0.5	0.3	0.4	0	-0.15	0.6	0.75	0.190861	Basalt
3668	1800	126.432	-14.3322	0.1	0.75	0.65	0.4	0	-0.4	0.5	0.75	0.190885	Basalt
2162	10800	125.894	-14.6327	0.2	0	-0.2	0.3	0	-0.3	0.5	0	0.191027	Basalt
914	13500	125.403	-14.9898	0.1	0	-0.1	0.1	0	0.15	0.2	0.25	0.191469	Coastal
1518	6300	125.358	-14.6648	0	0	0	0.2	0	0.05	0.2	0.25	0.191602	Basalt
975	7200	125.383	-14.9376	0	0.25	0.25	0.2	0	-0.2	0.2	0.25	0.19222	Sandstone
2884	365400	125.853	-14.4686	0.1	0.25	0.15	0.1	0	-0.1	0.2	0.25	0.192265	Basalt
2105	13500	126.011	-14.6912	0.1	1	0.9	0.2	0	-0.2	0.3	1	0.192272	Sandstone
4380	3600	126.131	-14.0669	0	0.25	0.25	0.1	0	-0.1	0.1	0.25	0.192424	Basalt
1895	11700	125.863	-14.639	0.2	0.25	0.05	0.3	0	-0.3	0.5	0.25	0.192544	Basalt
4822	10800	126.214	-14.0436	0	0	0	0.1	0	-0.1	0.1	0	0.192565	Basalt
2080	9900	125.917	-14.7055	0.3	0.25	-0.05	0.2	0	0.05	0.5	0.5	0.193334	Basalt
5228	1800	126.204	-13.9788	0	0	0	0	0	0	0	0	0.193688	Laterite
454	900	125.066	-15.0887	0	0.25	0.25	0.3	0	-0.3	0.3	0.25	0.193774	Basalt
3790	2700	126.399	-14.2757	0.2	0.25	0.05	0.2	0	0.05	0.4	0.5	0.193927	Sandstone
4142	900	126.48	-14.1672	0.1	0.25	0.15	0.3	0	-0.3	0.4	0.25	0.194019	Sandstone
4215	9900	125.996	-14.065	0	0.25	0.25	0	0	0	0	0.25	0.194079	Basalt
4027	3600	126.195	-14.1274	0.1	0	-0.1	0.2	0	-0.2	0.3	0	0.194387	Basalt
1846	16200	125.843	-14.65	0.3	0.25	-0.05	0.2	0	0.05	0.5	0.5	0.194491	Laterite
3050	9000	126.519	-14.3715	0.2	0.5	0.3	0.5	0	-0.25	0.7	0.75	0.194494	Basalt
4637	67500	126.209	-14.1164	0	0	0	0.3	0	-0.3	0.3	0	0.194833	Basalt
4551	9900	126.011	-14.0275	0	0.25	0.25	0	0	0	0	0.25	0.194863	Basalt
2151	1800	125.897	-14.6397	0.2	0	-0.2	0.3	0	-0.3	0.5	0	0.195292	Basalt
5177	900	126.017	-13.9277	0	0	0	0	0	0	0	0	0.195396	Laterite
4166	900	126.529	-14.2317	0.2	0.5	0.3	0.4	0	-0.4	0.6	0.5	0.195437	Basalt
139	900	125.079	-15.1525	0.1	0.25	0.15	0.3	0	-0.3	0.3	0.25	0.195771	Basalt
1637	27900	125.874	-14.7305	0.3	0.25	-0.05	0.3	0	0.2	0.6	0.75	0.195908	Basalt
4686	900	126.204	-14.1044	0	0	0	0.2	0	-0.2	0.2	0	0.195947	Basalt
1945	44100	125.852	-14.6325	0.2	0.25	0.05	0.3	0	-0.3	0.5	0.25	0.196258	Laterite
740	51300	125.467	-15.0133	0	0	0	0.1	0	0.15	0.1	0.25	0.19627	Coastal
4422	3600	126.075	-14.0574	0	0	0	0	0	0	0	0	0.196289	Laterite
2869	900	125.825	-14.4738	0.1	0.25	0.15	0.1	0	-0.1	0.2	0.25	0.196458	Basalt
2865	2700	125.839	-14.4749	0.1	0.25	0.15	0.1	0	-0.1	0.2	0.25	0.196764	Basalt
4830	7200	126.215	-14.0405	0	0.25	0.25	0.1	0	-0.1	0.1	0.25	0.196828	Basalt
3895	10800	126.532	-14.2384	0.2	0.5	0.3	0.3	0	-0.3	0.5	0.5	0.196888	Basalt
1367	4500	125.987	-14.763	0	0.25	0.25	0.4	0	-0.4	0.4	0.25	0.197047	Sandstone
365	1800	125.056	-15.1094	0	0.25	0.25	0.3	0	-0.3	0.3	0.25	0.197246	Basalt
732	274500	125.394	-15.0285	0.1	0	-0.1	0.1	0	0.15	0.2	0.25	0.197472	Coastal
2035	12600	125.825	-14.621	0.3	0.5	0.2	0.4	0	-0.15	0.7	0.75	0.197672	Laterite
1669	6300	125.862	-14.7089	0.1	0.5	0.4	0.4	0	-0.15	0.5	0.75	0.197814	Basalt
3325	2700	126.043	-14.332	0	0	0	0.1	0	0.15	0.1	0.25	0.198052	Basalt
1905	10800	125.835	-14.6387	0.3	0.25	-0.05	0.2	0	0.05	0.5	0.5	0.199235	Basalt
3703	900	126.49	-14.307	0.2	0.25	0.05	0.3	0	-0.3	0.5	0.25	0.199286	Basalt
950	2700	125.496	-14.9579	0.1	0	-0.1	0.1	0	-0.1	0.2	0	0.199303	Sandstone
4270	1800	125.985	-14.0243	0	0.25	0.25	0	0	0	0	0.25	0.19948	Laterite
1520	3600	125.357	-14.6633	0	0.25	0.25	0.2	0	0.05	0.2	0.25	0.199598	Sandstone
4468	1800	126.059	-14.0472	0	0	0	0	0	0	0	0	0.199964	Laterite
649	1800	125.208	-15.0673	0	0	0	0	0	0	0	0	0.199984	Sandstone
1375	3600	125.924	-14.7572	0.4	0.25	-0.15	0.3	0	-0.05	0.7	0.5	0.200341	Basalt
2003	48600	125.853	-14.6271	0.3	0.25	-0.05	0.3	0	-0.3	0.5	0.25	0.200361	Basalt
4611	28800	126.066	-14.006	0	0	0	0	0	0	0	0	0.200427	Basalt
1705	900	125.855	-14.6984	0.2	0.5	0.3	0.4	0	-0.15	0.6	0.75	0.200825	Basalt
4800	8100	126.172	-14.0479	0.1	0	-0.1	0.1	0	-0.1	0.2	0	0.200994	Laterite
1976	1800	125.822	-14.6302	0.2	0.5	0.3	0.4	0	-0.15	0.6	0.75	0.201455	Basalt
2952	10800	126.116	-14.3882	0	0	0	0.3	0	-0.3	0.3	0	0.201684	Sandstone
4243	1800	126.003	-14.04	0	0	0	0	0	0	0	0	0.20172	Basalt
116	6300	125.082	-15.1652	0.1	0.5	0.4	0.2	0	-0.2	0.3	0.5	0.202081	Sandstone
2096	15300	125.907	-14.6972	0.3	0.25	-0.05	0.2	0	0.05	0.5	0.5	0.202196	Basalt
5112	34200	126.092	-13.9511	0	0	0	0.1	0	-0.1	0.1	0	0.202286	Basalt
1485	900	125.302	-14.7221	0.1	0.75	0.65	0.1	0	0.15	0.2	0.75	0.202408	Basalt
1160	1800	125.593	-14.826	0	0.25	0.25	0.6	0	-0.35	0.6	0.5	0.202428	Sandstone
669	900	125.282	-15.1213	0	0	0	0	0	0.25	0	0.25	0.202445	Sandstone
1519	11700	125.365	-14.664	0	0	0	0.2	0	0.05	0.2	0.25	0.202446	Sandstone
1561	1800	125.448	-14.6495	0	0.25	0.25	0.2	0	-0.2	0.2	0.25	0.202726	Sandstone
4790	32400	126.181	-14.0537	0	0	0	0.1	0	-0.1	0.1	0	0.202752	Basalt
1656	5400	125.873	-14.717	0.4	0.5	0.1	0.3	0	-0.05	0.6	0.75	0.202961	Basalt
3085	11700	125.301	-14.2891	0	0	0	0	0	0	0	0	0.203092	Basalt
998	900	125.494	-14.9218	0	0.5	0.5	0.4	0	-0.15	0.4	0.5	0.203124	Sandstone
75	900	125.03	-15.204	0	0.25	0.25	0.2	0	-0.2	0.2	0.25	0.203584	Basalt
2847	900	125.825	-14.4833	0.1	0.25	0.15	0.1	0	-0.1	0.2	0.25	0.203742	Basalt
4593	2700	126.096	-14.013	0	0.25	0.25	0	0	0	0	0.25	0.203946	Basalt
1899	900	125.864	-14.6384	0.2	0.25	0.05	0.3	0	-0.3	0.5	0.25	0.204547	Basalt
1574	3600	125.576	-14.7168	0	0.25	0.25	0.3	0	-0.05	0.3	0.5	0.20467	Sandstone
354	900	125.08	-15.1119	0	0.25	0.25	0.3	0	-0.3	0.3	0.25	0.205019	Basalt
4365	3600	126.114	-14.0702	0.1	0	-0.1	0.1	0	-0.1	0.2	0	0.205243	Basalt
766	7200	125.195	-14.9643	0	0	0	0	0	0	0	0	0.205261	Basalt
4563	900	126.034	-14.0234	0	0	0	0	0	0	0	0	0.205342	Basalt
3129	900	125.631	-14.2547	0.2	0.25	0.05	0.1	0	0.15	0.3	0.5	0.205362	Alluvium and colluvium
1872	4500	125.76	-14.6456	0.3	0.5	0.2	0.2	0	0.05	0.5	0.75	0.205381	Basalt
3014	13500	126.497	-14.4534	0	0.5	0.5	0.3	0	-0.3	0.3	0.5	0.205598	Sandstone
169	63900	125.099	-15.1265	0	0.25	0.25	0.3	0	-0.05	0.3	0.5	0.205681	Basalt
1775	8100	125.881	-14.6837	0.2	0	-0.2	0.3	0	-0.3	0.5	0	0.205925	Basalt
4392	27000	126.02	-14.067	0	0	0	0	0	0	0	0	0.205929	Laterite
1079	27000	125.813	-14.8933	0.6	0.25	-0.35	0.5	0	0	0.9	0.75	0.206009	Basalt
1677	2700	125.873	-14.7057	0.2	0.25	0.05	0.2	0	0.05	0.4	0.5	0.206045	Basalt
3471	2700	126.152	-14.32	0.1	0.5	0.4	0.4	0	-0.4	0.5	0.5	0.206047	Sandstone
3274	1800	126.138	-14.3565	0	0	0	0.3	0	-0.3	0.3	0	0.20611	Sandstone
4352	900	126.089	-14.072	0	0	0	0	0	0	0	0	0.207224	Basalt
3340	2700	126.035	-14.329	0	0	0	0.1	0	0.15	0.1	0.25	0.207348	Basalt
4376	10800	126.023	-14.0691	0	0	0	0	0	0	0	0	0.207437	Laterite
5097	21600	126.089	-13.9538	0	0	0	0.1	0	-0.1	0.1	0	0.207456	Laterite
1671	2700	125.823	-14.7085	0.1	0.5	0.4	0.4	0	-0.15	0.4	0.75	0.207529	Basalt
1254	900	125.696	-14.7566	0.3	0.5	0.2	0	0	0	0.3	0.5	0.207571	Sandstone
534	900	125.064	-15.0497	0	0.25	0.25	0.3	0	-0.3	0.3	0.25	0.207621	Basalt
4359	9900	126.068	-14.0717	0	0.25	0.25	0	0	0	0	0.25	0.20821	Basalt
1130	900	125.311	-14.841	0	0.5	0.5	0.3	0	-0.05	0.3	0.75	0.208264	Sandstone
3992	11700	126.163	-14.1759	0.1	0.25	0.15	0.4	0	-0.4	0.5	0.25	0.208553	Sandstone
3272	6300	126.093	-14.3583	0	0.25	0.25	0.3	0	-0.05	0.3	0.25	0.208962	Sandstone
230	1800	125.128	-15.1395	0	0	0	0.3	0	-0.05	0.3	0.25	0.209267	Sandstone
5034	44100	126.131	-13.9846	0.1	0	-0.1	0	0	0	0.1	0	0.2093	Basalt
4138	2700	126.413	-14.1903	0.1	0.25	0.15	0.4	0	-0.15	0.5	0.5	0.209476	Sandstone
1880	222300	125.862	-14.6477	0.3	0.25	-0.05	0.3	0	-0.3	0.5	0.25	0.209624	Basalt
813	2700	125.365	-14.9827	0	0.25	0.25	0.2	0	0.05	0.2	0.5	0.209696	Sandstone
4131	1800	126.472	-14.2029	0.3	0.75	0.45	0.5	0	0	0.7	1	0.210664	Basalt
4854	3600	126.155	-14.0316	0.1	0.25	0.15	0.1	0	-0.1	0.2	0.25	0.211045	Basalt
3516	900	126.167	-14.2771	0	0	0	0.3	0	-0.05	0.3	0.25	0.2111	Sandstone
526	1800	125.119	-15.0531	0	0	0	0.2	0	-0.2	0.2	0	0.211661	Basalt
4384	900	126.13	-14.0658	0	0.25	0.25	0.1	0	-0.1	0.1	0.25	0.211829	Basalt
151	2700	125.064	-15.1436	0	0	0	0.3	0	-0.3	0.3	0	0.211948	Basalt
4242	1800	125.994	-14.0403	0	0	0	0	0	0	0	0	0.212014	Laterite
3307	9900	126.085	-14.3392	0.1	0	-0.1	0.3	0	-0.05	0.4	0.25	0.212155	Sandstone
1699	2700	125.838	-14.6995	0.3	0.5	0.2	0.4	0	-0.15	0.6	0.75	0.212514	Basalt
4775	151200	126.14	-14.069	0	0.25	0.25	0.1	0	-0.1	0.1	0.25	0.212522	Basalt
4561	1800	126.067	-14.0235	0	0.25	0.25	0	0	0	0	0.25	0.212785	Basalt
364	2700	125.077	-15.1099	0	0.25	0.25	0.3	0	-0.3	0.3	0.25	0.212912	Basalt
5226	94500	126.198	-13.9781	0	0	0	0	0	0	0	0	0.213751	Laterite
1330	2700	125.997	-14.8085	0.1	0.25	0.15	0.3	0	-0.3	0.4	0.25	0.213985	Sandstone
2720	1800	126.114	-14.5555	0.1	0.75	0.65	0.3	0	-0.05	0.4	0.75	0.214003	Sandstone
5150	900	126.07	-13.9376	0	0	0	0.1	0	-0.1	0.1	0	0.214073	Laterite
352	2700	125.102	-15.1119	0	0	0	0.3	0	-0.3	0.3	0	0.21455	Basalt
742	5400	125.402	-15.0114	0.1	0	-0.1	0.1	0	0.15	0.2	0.25	0.215373	Sandstone
1349	4500	125.971	-14.7788	0.2	0.5	0.3	0.3	0	-0.05	0.5	0.75	0.215677	Sandstone
734	37800	125.402	-15.0241	0.1	0	-0.1	0.1	0	0.15	0.2	0.25	0.215904	Sandstone
3368	5400	126.034	-14.3209	0	0	0	0.1	0	0.15	0.1	0.25	0.216423	Basalt
2314	900	126.162	-14.6318	0.1	0.25	0.15	0.5	0	-0.5	0.6	0.25	0.21643	Sandstone
1635	6300	125.839	-14.7319	0.3	0.75	0.45	0.3	0	-0.05	0.6	1	0.216492	Basalt
4241	21600	126.006	-14.042	0	0	0	0	0	0	0	0	0.216633	Basalt
3478	2700	126.17	-14.3089	0.1	0.25	0.15	0.4	0	-0.4	0.5	0.25	0.216689	Sandstone
3013	900	126.474	-14.457	0.1	1	0.9	0.5	0	-0.5	0.6	1	0.216792	Basalt
849	2700	125.261	-14.9414	0	0	0	0	0	0	0	0	0.216824	Coastal
1989	900	125.844	-14.6289	0.2	0.25	0.05	0.3	0	-0.05	0.4	0.5	0.2173	Basalt
4413	900	126.129	-14.0579	0	0	0	0.1	0	-0.1	0.1	0	0.217335	Basalt
1348	4500	125.901	-14.7895	0.5	0.75	0.25	0.2	0	-0.2	0.7	0.75	0.217356	Basalt
4726	3600	126.168	-14.0909	0	0	0	0.1	0	-0.1	0.1	0	0.217377	Basalt
1578	7200	125.686	-14.7416	0.2	0.5	0.3	0.1	0	0.15	0.3	0.75	0.217899	Sandstone
3584	9900	126.36	-14.3119	0.2	0.5	0.3	0.3	0	-0.05	0.4	0.75	0.218	Sandstone
2157	9000	125.889	-14.6363	0.2	0	-0.2	0.3	0	-0.3	0.5	0	0.21802	Basalt
2566	900	125.798	-14.498	0.2	0.75	0.55	0.2	0	-0.2	0.4	0.75	0.21815	Basalt
4458	900	126.092	-14.0492	0	0	0	0	0	0	0	0	0.218162	Basalt
2905	7200	126.064	-14.4905	0	0.25	0.25	0.3	0	-0.3	0.3	0.25	0.218196	Sandstone
1653	1800	125.876	-14.719	0.3	0.25	-0.05	0.2	0	0.3	0.4	0.75	0.218228	Basalt
4353	900	126.092	-14.072	0	0	0	0	0	0	0	0	0.218395	Basalt
4968	2700	126.365	-14.0492	0.2	0.25	0.05	0.1	0	-0.1	0.3	0.25	0.218908	Sandstone
495	1800	125.043	-15.0672	0	0.25	0.25	0.3	0	-0.3	0.3	0.25	0.219	Basalt
3180	9000	125.989	-14.3273	0	0	0	0	0	0	0	0	0.219577	Basalt
1334	900	125.889	-14.8041	0.5	0.5	0	0.2	0	0.05	0.7	0.75	0.219669	Basalt
3344	900	126.023	-14.327	0	0	0	0.1	0	0.15	0.1	0.25	0.219909	Basalt
4176	1800	126.519	-14.2144	0.3	0.5	0.2	0.4	0	-0.4	0.7	0.5	0.219912	Basalt
4461	900	126.064	-14.049	0	0.25	0.25	0	0	0	0	0.25	0.220177	Basalt
2813	6300	125.266	-14.4219	0	0	0	0	0	0	0	0	0.220229	Basalt
3422	900	126.091	-14.2708	0.1	0	-0.1	0.3	0	-0.3	0.4	0	0.220285	Sandstone
343	1800	125.101	-15.1149	0	0	0	0.3	0	-0.05	0.3	0.25	0.220328	Basalt
1557	4500	125.428	-14.6591	0	0.25	0.25	0.4	0	-0.4	0.4	0.25	0.220464	Basalt
349	900	125.036	-15.1136	0	0.25	0.25	0.3	0	-0.3	0.3	0.25	0.220624	Basalt
5104	5400	126.104	-13.9518	0	0	0	0.1	0	-0.1	0.1	0	0.220806	Basalt
2955	900	126.023	-14.3887	0	0.25	0.25	0.1	0	-0.1	0.1	0.25	0.221084	Basalt
1755	4500	125.822	-14.6886	0.3	0.75	0.45	0.2	0	-0.2	0.5	0.75	0.221164	Basalt
1950	57600	125.863	-14.6346	0.2	0.25	0.05	0.3	0	-0.3	0.5	0.25	0.22123	Basalt
2126	1800	126.014	-14.6828	0	0.75	0.75	0.2	0	-0.2	0.2	0.75	0.221253	Sandstone
331	2700	125.039	-15.1214	0	0.25	0.25	0.3	0	-0.3	0.3	0.25	0.221597	Basalt
4386	900	126.13	-14.0655	0	0.25	0.25	0.1	0	-0.1	0.1	0.25	0.221656	Basalt
1504	31500	125.266	-14.6863	0	0.5	0.5	0	0	0.25	0	0.75	0.221754	Coastal
4043	4500	126.195	-14.1195	0.1	0	-0.1	0.2	0	-0.2	0.3	0	0.221854	Laterite
3775	8100	126.505	-14.2785	0.2	0.5	0.3	0.3	0	-0.3	0.5	0.5	0.221856	Laterite
2829	7200	125.8	-14.4937	0.2	0.5	0.3	0.2	0	-0.2	0.4	0.5	0.221893	Basalt
4459	4500	126.067	-14.0497	0	0.25	0.25	0	0	0	0	0.25	0.221986	Laterite
3701	9000	126.455	-14.3084	0.2	0.5	0.3	0.5	0	-0.5	0.7	0.5	0.222069	Basalt
3195	5400	125.991	-14.3222	0	0	0	0	0	0	0	0	0.22214	Basalt
4985	13500	126.051	-13.9933	0	0	0	0	0	0	0	0	0.222568	Basalt
4493	10800	126.035	-14.0429	0	0	0	0	0	0	0	0	0.222976	Basalt
773	99000	125.251	-14.9389	0	0	0	0	0	0	0	0	0.223055	Sandstone
3772	4500	126.452	-14.2791	0.2	0.5	0.3	0.4	0	-0.4	0.6	0.5	0.223415	Basalt
1239	4500	125.754	-14.7684	0.3	0.25	-0.05	0.4	0	0.1	0.6	0.75	0.224055	Basalt
3725	2700	126.501	-14.2973	0.2	0.5	0.3	0.3	0	-0.3	0.5	0.5	0.224273	Basalt
2103	900	125.909	-14.6939	0.3	0.25	-0.05	0.2	0	0.05	0.5	0.5	0.224359	Basalt
663	4500	125.172	-15.0508	0	0.25	0.25	0.1	0	-0.1	0.1	0.25	0.225134	Sandstone
4174	2700	126.535	-14.2182	0.2	0.75	0.55	0.4	0	-0.4	0.6	0.75	0.225431	Laterite
1370	4500	125.994	-14.7592	0	0.25	0.25	0.5	0	-0.5	0.5	0.25	0.22556	Sandstone
3204	2700	125.999	-14.3182	0	0	0	0.1	0	-0.1	0.1	0	0.225611	Basalt
3523	1800	126.163	-14.2661	0	0.25	0.25	0.3	0	-0.3	0.3	0.25	0.225986	Sandstone
1782	900	125.828	-14.6757	0.4	0.5	0.1	0.3	0	-0.05	0.5	0.75	0.226479	Basalt
3040	44100	126.495	-14.3965	0.1	1	0.9	0.5	0	-0.5	0.5	1	0.226578	Sandstone
1019	6300	125.528	-14.9462	0	0.25	0.25	0.4	0	-0.4	0.4	0.25	0.227235	Alluvium and colluvium
1886	13500	125.832	-14.6412	0.3	0.25	-0.05	0.2	0	0.05	0.5	0.5	0.22736	Basalt
1512	900	125.372	-14.6718	0	0.5	0.5	0.3	0	-0.05	0.3	0.5	0.227615	Basalt
2076	3600	125.918	-14.7056	0.3	0.25	-0.05	0.2	0	0.05	0.5	0.5	0.227954	Basalt
2243	2700	126.044	-14.6506	0	0.25	0.25	0.4	0	-0.4	0.4	0.25	0.22828	Sandstone
3062	9000	125.217	-14.3044	0	0	0	0	0	0	0	0	0.228337	Basalt
2323	9000	125.181	-14.6036	0	0	0	0.1	0	0.15	0.1	0.25	0.228477	Sandstone
3675	3600	126.431	-14.3271	0.1	0.5	0.4	0.4	0	-0.4	0.5	0.5	0.228786	Basalt
3726	14400	126.501	-14.2954	0.2	0.5	0.3	0.3	0	-0.3	0.5	0.5	0.228802	Basalt
3398	2700	126.02	-14.3106	0	0	0	0.1	0	0.15	0.1	0.25	0.229133	Basalt
3766	900	126.412	-14.2813	0.3	0.75	0.45	0.3	0	-0.3	0.6	0.75	0.229263	Laterite
4860	900	126.141	-14.0299	0.1	0.25	0.15	0.1	0	-0.1	0.2	0.25	0.229304	Basalt
4151	4500	126.468	-14.1641	0	0.75	0.75	0.2	0	-0.2	0.2	0.75	0.229361	Sandstone
188	900	125.251	-15.2116	0.1	0.25	0.15	0.2	0	-0.2	0.2	0.25	0.229402	Sandstone
4891	900	126.142	-14.0255	0.1	0.25	0.15	0.1	0	-0.1	0.2	0.25	0.229646	Basalt
911	4500	125.461	-14.9893	0	0	0	0.3	0	-0.3	0.3	0	0.229677	Sandstone
3061	9900	125.217	-14.3056	0	0	0	0	0	0	0	0	0.229978	Basalt
1698	2700	125.819	-14.6997	0.4	1	0.6	0.2	0	0.05	0.5	1	0.230793	Basalt
4755	2700	126.176	-14.0733	0	0.25	0.25	0	0	0	0	0.25	0.231062	Basalt
3635	900	126.488	-14.3572	0.2	1	0.8	0.4	0	-0.4	0.6	1	0.231213	Basalt
2939	55800	126.027	-14.3977	0	0.25	0.25	0.2	0	-0.2	0.2	0.25	0.231301	Sandstone
4191	900	126.552	-14.1913	0	0.5	0.5	0.2	0	-0.2	0.2	0.5	0.2315	Sandstone
1567	2700	125.43	-14.6266	0	0.25	0.25	0.2	0	-0.2	0.2	0.25	0.231525	Basalt
1457	19800	125.234	-14.7066	0.1	0.5	0.4	0.1	0	-0.1	0.2	0.5	0.23157	Basalt
89	8100	125.006	-15.1833	0	0	0	0.2	0	-0.2	0.2	0	0.231643	Basalt
5200	900	126.085	-13.9092	0	0	0	0.1	0	-0.1	0.1	0	0.231707	Laterite
3755	6300	126.498	-14.2869	0.2	0.75	0.55	0.3	0	-0.3	0.5	0.75	0.231723	Basalt
3504	1800	126.261	-14.2882	0.1	0.5	0.4	0.4	0	-0.15	0.5	0.5	0.232419	Sandstone
4361	24300	126.032	-14.0724	0	0.5	0.5	0	0	0	0	0.5	0.232632	Laterite
4343	60300	126.036	-14.0745	0	0.5	0.5	0	0	0	0	0.5	0.233217	Laterite
3670	3600	126.433	-14.3321	0.1	0.75	0.65	0.4	0	-0.4	0.5	0.75	0.233306	Basalt
29	1800	125.089	-15.2248	0.2	0.75	0.55	0.2	0	0.05	0.4	1	0.233317	Basalt
3160	14400	125.98	-14.3334	0	0	0	0	0	0	0	0	0.233405	Basalt
4313	4500	126.02	-14.0888	0	0	0	0	0	0	0	0	0.233635	Basalt
1626	5400	125.88	-14.7379	0.4	0.25	-0.15	0.2	0	0.3	0.6	0.75	0.23427	Basalt
4300	900	126.134	-14.1026	0.1	0	-0.1	0.1	0	-0.1	0.2	0	0.234492	Basalt
3400	1800	126.027	-14.3105	0	0	0	0.1	0	0.15	0.1	0.25	0.234748	Basalt
1070	15300	125.77	-14.9386	0.4	0.5	0.1	0.4	0	0.1	0.8	0.75	0.234918	Laterite
2333	2700	125.182	-14.5696	0	0	0	0.1	0	0.15	0.1	0.25	0.235017	Sandstone
4107	1800	126.488	-14.2213	0.2	0.5	0.3	0.3	0	-0.3	0.5	0.5	0.235021	Laterite
3864	2700	126.523	-14.293	0.1	0.25	0.15	0.3	0	-0.3	0.4	0.25	0.235044	Basalt
4885	5400	126.216	-14.0258	0	0	0	0.1	0	-0.1	0.1	0	0.235259	Basalt
427	1800	125.038	-15.0934	0	0.25	0.25	0.2	0	-0.2	0.2	0.25	0.235428	Basalt
1564	22500	125.425	-14.6324	0	0.25	0.25	0.3	0	-0.3	0.3	0.25	0.235429	Basalt
3653	900	126.451	-14.3474	0.1	0.5	0.4	0.4	0	-0.4	0.5	0.5	0.235571	Sandstone
4683	4500	126.14	-14.106	0.1	0.25	0.15	0.1	0	-0.1	0.2	0.25	0.236149	Basalt
4379	44100	126.124	-14.0681	0.1	0.25	0.15	0.1	0	-0.1	0.2	0.25	0.236203	Basalt
3098	1800	125.309	-14.2812	0	0	0	0	0	0	0	0	0.236207	Basalt
3484	12600	126.156	-14.3037	0.1	0.5	0.4	0.4	0	-0.4	0.5	0.5	0.236484	Sandstone
3224	3600	126.009	-14.3067	0	0	0	0.1	0	0.15	0.1	0.25	0.236721	Basalt
436	4500	125.064	-15.0917	0	0.25	0.25	0.3	0	-0.3	0.3	0.25	0.237022	Basalt
2890	371700	125.994	-14.4385	0	0	0	0.2	0	-0.2	0.2	0	0.237232	Sandstone
3199	135000	125.993	-14.324	0	0	0	0	0	0	0	0	0.237646	Basalt
4515	148500	126.051	-14.0382	0	0	0	0	0	0	0	0	0.237754	Basalt
1426	1800	126.105	-14.7648	0	0.75	0.75	0.6	0	-0.6	0.6	0.75	0.238221	Sandstone
2830	900	125.803	-14.4933	0.2	0.5	0.3	0.2	0	-0.2	0.4	0.5	0.238265	Basalt
118	5400	125.022	-15.1649	0	0	0	0.1	0	-0.1	0.1	0	0.238413	Basalt
5067	52200	126.108	-13.9682	0	0.25	0.25	0.1	0	-0.1	0.1	0.25	0.238435	Laterite
4787	3600	126.144	-14.0554	0	0.5	0.5	0.1	0	-0.1	0.1	0.5	0.238445	Laterite
624	4500	125.243	-15.0848	0	0	0	0	0	0	0	0	0.238904	Coastal
4548	54900	126.011	-14.0306	0	0.25	0.25	0	0	0	0	0.25	0.239003	Basalt
1813	1800	125.846	-14.6609	0.4	0.25	-0.15	0.2	0	0.05	0.6	0.5	0.239222	Basalt
869	37800	125.323	-14.908	0	0.25	0.25	0.3	0	-0.3	0.3	0.25	0.239232	Basalt
3058	5400	125.218	-14.3096	0	0	0	0	0	0	0	0	0.239573	Laterite
4350	25200	126.061	-14.073	0	0	0	0	0	0	0	0	0.239628	Basalt
1177	3600	125.563	-14.7767	0.1	0.5	0.4	0.3	0	-0.05	0.3	0.75	0.239789	Sandstone
2146	130500	125.89	-14.6442	0.2	0	-0.2	0.3	0	-0.3	0.5	0	0.240028	Basalt
4873	11700	126.203	-14.0279	0	0.25	0.25	0.1	0	-0.1	0.1	0.25	0.240079	Basalt
4680	36900	126.212	-14.1083	0	0	0	0.3	0	-0.3	0.3	0	0.240351	Basalt
3735	900	126.478	-14.2931	0.2	0.75	0.55	0.3	0	-0.3	0.5	0.75	0.240849	Laterite
1415	2700	126.026	-14.7959	0.2	0.5	0.3	0.5	0	-0.5	0.6	0.5	0.24089	Sandstone
2662	1800	126.104	-14.5838	0.1	0.5	0.4	0.3	0	-0.05	0.4	0.75	0.240971	Sandstone
634	4500	125.206	-15.0828	0	0	0	0	0	0	0	0	0.241575	Sandstone
1558	900	125.488	-14.6576	0	0	0	0.1	0	-0.1	0.1	0	0.241721	Sandstone
1688	2700	125.848	-14.7017	0.2	0.5	0.3	0.4	0	-0.15	0.6	0.75	0.242276	Laterite
1374	6300	126.01	-14.7571	0	0.5	0.5	0.4	0	-0.4	0.4	0.5	0.242367	Sandstone
4836	900	126.165	-14.0372	0.1	0.5	0.4	0.1	0	-0.1	0.2	0.5	0.242637	Laterite
3392	2700	126.02	-14.3115	0	0	0	0.1	0	0.15	0.1	0.25	0.242899	Basalt
4312	4500	126.038	-14.0888	0	0	0	0	0	0	0	0	0.243304	Basalt
2669	900	126.118	-14.5793	0.1	0.25	0.15	0.3	0	-0.3	0.4	0.25	0.24336	Sandstone
4446	900	126.071	-14.0514	0	0.25	0.25	0	0	0	0	0.25	0.243763	Basalt
2093	1800	125.911	-14.6983	0.3	0.25	-0.05	0.2	0	0.05	0.5	0.5	0.243798	Basalt
4164	22500	126.53	-14.2334	0.2	0.5	0.3	0.4	0	-0.4	0.6	0.5	0.243953	Basalt
3159	15300	125.999	-14.3335	0	0	0	0.1	0	-0.1	0.1	0	0.243995	Basalt
503	16200	125.106	-15.0645	0	0	0	0.3	0	-0.3	0.3	0	0.244232	Coastal
2063	18000	125.902	-14.7291	0.3	0.25	-0.05	0.2	0	0.3	0.5	0.75	0.244247	Basalt
2776	900	126.127	-14.4928	0.1	0.25	0.15	0.5	0	-0.25	0.6	0.5	0.244321	Sandstone
888	900	125.367	-14.8874	0.1	0.5	0.4	0.4	0	-0.15	0.5	0.75	0.244624	Basalt
4349	900	126.092	-14.0722	0	0	0	0	0	0	0	0	0.245006	Basalt
3671	3600	126.451	-14.33	0.2	0.5	0.3	0.4	0	-0.4	0.6	0.5	0.245017	Basalt
2818	900	125.522	-14.4448	0	0	0	0	0	0	0	0	0.245062	Sandstone
2823	6300	125.525	-14.4397	0	0	0	0	0	0	0	0	0.245289	Basalt
4624	8100	126.066	-13.9973	0	0	0	0	0	0	0	0	0.245322	Basalt
3679	900	126.464	-14.3223	0.1	0.5	0.4	0.4	0	-0.4	0.5	0.5	0.245682	Basalt
4297	1800	125.984	-14.0038	0	0.25	0.25	0	0	0	0	0.25	0.245761	Basalt
127	2700	125.034	-15.1599	0	0	0	0.2	0	-0.2	0.2	0	0.245763	Coastal
57	2700	125.083	-15.2097	0.2	0.5	0.3	0.2	0	0.05	0.4	0.75	0.245795	Basalt
3654	5400	126.423	-14.3466	0.2	0.5	0.3	0.4	0	-0.4	0.6	0.5	0.245846	Laterite
620	1800	125.252	-15.0865	0	0	0	0	0	0	0	0	0.245909	Sandstone
182	4500	125.22	-15.2179	0.1	0	-0.1	0.2	0	0.05	0.3	0.25	0.246041	Sandstone
5070	44100	126.079	-13.9655	0	0.5	0.5	0.1	0	-0.1	0.1	0.5	0.246054	Laterite
4872	900	126.135	-14.0286	0.1	0.25	0.15	0.1	0	-0.1	0.2	0.25	0.246157	Basalt
1361	8100	125.958	-14.7665	0.2	0.25	0.05	0.5	0	-0.25	0.7	0.5	0.246236	Sandstone
511	7200	125.123	-15.0605	0	0	0	0.3	0	-0.3	0.3	0	0.246248	Basalt
4748	5400	126.155	-14.0771	0	0.25	0.25	0.1	0	-0.1	0.1	0.25	0.246264	Basalt
5091	54000	126.083	-13.9564	0	0.25	0.25	0.1	0	-0.1	0.1	0.25	0.246384	Basalt
4296	3600	125.983	-14.0041	0	0.25	0.25	0	0	0	0	0.25	0.246481	Basalt
3342	5400	126.012	-14.3281	0	0	0	0.1	0	0.15	0.1	0.25	0.246573	Basalt
2158	6300	125.894	-14.6355	0.2	0	-0.2	0.3	0	-0.3	0.5	0	0.246634	Basalt
4354	4500	126.11	-14.072	0.1	0	-0.1	0.1	0	-0.1	0.2	0	0.246828	Laterite
1552	3600	125.454	-14.6668	0	0	0	0.4	0	-0.4	0.4	0	0.246979	Sandstone
2301	1800	126.17	-14.72	0.1	0.75	0.65	0.6	0	-0.6	0.7	0.75	0.247026	Sandstone
10	16200	125.137	-15.2538	0.2	0.5	0.3	0.1	0	0.15	0.3	0.75	0.247099	Basalt
1745	900	125.854	-14.6894	0.2	0.5	0.3	0.4	0	-0.15	0.6	0.75	0.247174	Basalt
2665	1800	126.102	-14.5799	0.1	0.25	0.15	0.2	0	0.05	0.3	0.5	0.247396	Sandstone
4756	4500	126.164	-14.0734	0	0.25	0.25	0	0	0	0	0.25	0.247585	Basalt
3401	4500	126.025	-14.31	0	0	0	0.1	0	0.15	0.1	0.25	0.247737	Basalt
1983	1800	125.844	-14.6295	0.2	0.25	0.05	0.2	0	0.05	0.4	0.5	0.247831	Basalt
2677	27900	126.079	-14.5754	0.1	0.25	0.15	0.5	0	-0.25	0.6	0.5	0.247942	Sandstone
1808	7200	125.856	-14.6639	0.4	0.25	-0.15	0.3	0	-0.3	0.6	0.25	0.248355	Basalt
2909	900	126.1	-14.4433	0	0	0	0.4	0	0.1	0.4	0.5	0.248971	Sandstone
1442	9900	126.188	-14.7641	0.1	0.25	0.15	0.6	0	-0.35	0.6	0.5	0.249001	Sandstone
1234	3600	125.643	-14.7724	0.1	0	-0.1	0.1	0	-0.1	0.2	0	0.249618	Sandstone
358	3600	125.038	-15.111	0	0.25	0.25	0.3	0	-0.3	0.3	0.25	0.249818	Basalt
1063	1800	125.711	-14.8732	0.3	0.5	0.2	0.3	0	-0.05	0.5	0.75	0.24985	Sandstone
3031	5400	126.487	-14.4121	0	0.5	0.5	0.4	0	-0.4	0.4	0.5	0.249897	Sandstone
2736	900	126.103	-14.5448	0.2	0.25	0.05	0.3	0	-0.05	0.5	0.5	0.249987	Sandstone
891	9000	125.354	-14.8842	0.1	0.5	0.4	0.3	0	-0.05	0.4	0.75	0.250641	Basalt
653	900	125.194	-15.0666	0	0	0	0	0	0	0	0	0.250655	Sandstone
156	900	125.103	-15.1352	0	0.25	0.25	0.3	0	-0.05	0.3	0.5	0.251024	Basalt
667	2700	125.166	-15.0315	0	0.25	0.25	0.1	0	-0.1	0.1	0.25	0.251029	Sandstone
1075	3600	125.785	-14.924	0.4	0.5	0.1	0.4	0	-0.15	0.7	0.75	0.251311	Basalt
5181	1800	126.073	-13.9245	0	0	0	0.1	0	-0.1	0.1	0	0.251368	Basalt
1893	9000	125.87	-14.639	0.2	0.25	0.05	0.3	0	-0.3	0.5	0.25	0.2515	Basalt
3475	5400	126.179	-14.3195	0.1	0.25	0.15	0.4	0	-0.4	0.5	0.25	0.251519	Sandstone
2258	2700	126.066	-14.646	0	0.25	0.25	0.4	0	-0.15	0.4	0.5	0.251605	Sandstone
2026	2700	125.846	-14.6222	0.2	0.25	0.05	0.2	0	0.05	0.4	0.5	0.251699	Coastal
1789	13500	125.844	-14.6731	0.4	0.25	-0.15	0.2	0	0.05	0.5	0.5	0.251761	Basalt
299	4500	125.276	-15.1744	0.1	0.25	0.15	0.1	0	-0.1	0.2	0.25	0.251999	Sandstone
4688	17100	126.143	-14.1056	0.1	0.25	0.15	0.1	0	-0.1	0.2	0.25	0.252006	Basalt
4657	900	126.149	-14.1097	0.1	0.25	0.15	0.1	0	-0.1	0.2	0.25	0.252431	Laterite
1186	900	125.637	-14.8508	0.1	0.25	0.15	0.6	0	-0.35	0.6	0.5	0.252537	Sandstone
2269	1800	126.034	-14.637	0	0.25	0.25	0.3	0	-0.3	0.3	0.25	0.252645	Sandstone
5193	3600	126.087	-13.9177	0	0	0	0.1	0	-0.1	0.1	0	0.252694	Coastal
308	4500	125.276	-15.1524	0	0.25	0.25	0.1	0	-0.1	0.1	0.25	0.252951	Sandstone
3534	3600	126.297	-14.3619	0	0.25	0.25	0.4	0	-0.15	0.4	0.5	0.253309	Basalt
1247	900	125.689	-14.76	0.3	0.25	-0.05	0	0	0	0.3	0.25	0.25375	Sandstone
1962	2700	125.864	-14.632	0.2	0.25	0.05	0.3	0	-0.3	0.5	0.25	0.253753	Basalt
2783	900	126.204	-14.5654	0.1	0.25	0.15	0.4	0	-0.4	0.5	0.25	0.254349	Sandstone
2817	900	125.529	-14.4455	0	0	0	0	0	0	0	0	0.254382	Sandstone
2344	11700	125.259	-14.6223	0	0.25	0.25	0.1	0	-0.1	0.1	0.25	0.254578	Basalt
1344	3600	125.944	-14.793	0.2	0.5	0.3	0.4	0	-0.15	0.6	0.75	0.255033	Basalt
1289	1800	125.868	-14.7475	0.3	0.75	0.45	0.3	0	-0.3	0.6	0.75	0.255092	Basalt
4216	16200	125.999	-14.0649	0	0	0	0	0	0	0	0	0.255108	Laterite
1879	2700	125.865	-14.6423	0.2	0.25	0.05	0.3	0	-0.3	0.5	0.25	0.255151	Basalt
774	36000	125.247	-14.9397	0	0	0	0	0	0	0	0	0.255153	Sandstone
1252	23400	125.737	-14.7576	0.3	0.5	0.2	0.1	0	0.4	0.4	1	0.255348	Basalt
464	9000	125.073	-15.0868	0	0.25	0.25	0.3	0	-0.3	0.3	0.25	0.255718	Basalt
1373	2700	126.01	-14.7587	0	0.5	0.5	0.4	0	-0.4	0.4	0.5	0.255753	Sandstone
1440	3600	126.204	-14.7803	0.1	0.5	0.4	0.6	0	-0.35	0.6	0.75	0.255798	Sandstone
1648	3600	125.86	-14.7211	0.3	0.25	-0.05	0.3	0	-0.05	0.5	0.5	0.255884	Basalt
910	1800	125.461	-14.99	0	0	0	0.3	0	-0.3	0.3	0	0.256003	Sandstone
2138	5400	126.008	-14.6568	0.1	0.25	0.15	0.2	0	0.05	0.2	0.5	0.256391	Sandstone
1910	4500	125.874	-14.6371	0.2	0.25	0.05	0.3	0	-0.3	0.5	0.25	0.256449	Basalt
4528	5400	126.031	-14.0329	0	0	0	0	0	0	0	0	0.256627	Basalt
641	3600	125.18	-15.0795	0	0	0	0	0	0	0	0	0.256639	Basalt
5108	3600	126.053	-13.9512	0	0	0	0.1	0	-0.1	0.1	0	0.256755	Laterite
4403	3600	126.131	-14.0602	0	0.25	0.25	0.1	0	-0.1	0.1	0.25	0.256805	Basalt
2728	3600	126.116	-14.5525	0.1	0.75	0.65	0.3	0	-0.05	0.4	0.75	0.256922	Sandstone
4145	900	126.477	-14.1653	0.1	0.5	0.4	0.3	0	-0.3	0.4	0.5	0.256979	Sandstone
4653	900	126.137	-14.1109	0.1	0.25	0.15	0.1	0	-0.1	0.2	0.25	0.257072	Basalt
3137	900	126.006	-14.3418	0	0	0	0.1	0	-0.1	0.1	0	0.257199	Basalt
4395	900	126.104	-14.0634	0.1	0	-0.1	0	0	0	0.1	0	0.257456	Basalt
948	2700	125.497	-14.959	0.1	0	-0.1	0.1	0	-0.1	0.2	0	0.257914	Sandstone
180	2700	125.236	-15.2286	0.1	0	-0.1	0.2	0	0.05	0.3	0.25	0.257984	Sandstone
3689	8100	126.5	-14.3176	0.2	1	0.8	0.4	0	-0.4	0.6	1	0.258021	Basalt
4883	16200	126.199	-14.0264	0	0.25	0.25	0.1	0	-0.1	0.1	0.25	0.258167	Basalt
976	25200	125.502	-14.937	0	0.25	0.25	0.4	0	-0.4	0.4	0.25	0.258244	Sandstone
1283	900	125.831	-14.7921	0.8	1	0.2	0.2	0	0.05	0.8	1	0.258643	Basalt
1431	4500	126.09	-14.7458	0.1	0.5	0.4	0.5	0	-0.5	0.6	0.5	0.258792	Sandstone
5011	17100	126.105	-13.9909	0.1	0.25	0.15	0	0	0	0.1	0.25	0.259028	Basalt
1170	18900	125.571	-14.7951	0	0.5	0.5	0.2	0	-0.2	0.2	0.5	0.259699	Sandstone
5210	900	126.188	-13.9873	0	0	0	0	0	0	0	0	0.259947	Basalt
477	2700	125.06	-15.0745	0	0.25	0.25	0.3	0	-0.3	0.3	0.25	0.260254	Basalt
4654	8100	126.148	-14.1104	0.1	0.25	0.15	0.2	0	-0.2	0.3	0.25	0.260543	Laterite
4632	3600	126.156	-14.1183	0.1	0	-0.1	0.2	0	-0.2	0.3	0	0.260616	Basalt
4785	5400	126.159	-14.0565	0	0	0	0.1	0	-0.1	0.1	0	0.260921	Basalt
4592	1800	126.096	-14.0138	0	0.25	0.25	0	0	0	0	0.25	0.260938	Basalt
348	3600	125.1	-15.1137	0	0	0	0.3	0	-0.05	0.3	0.25	0.261034	Basalt
3201	900	126.01	-14.3198	0	0	0	0.1	0	0.15	0.1	0.25	0.261142	Basalt
2253	1800	126.038	-14.6478	0	0.25	0.25	0.3	0	-0.05	0.3	0.5	0.261254	Sandstone
5208	1800	126.178	-13.988	0	0.25	0.25	0	0	0	0	0.25	0.262243	Basalt
1511	11700	125.261	-14.6825	0	0.5	0.5	0	0	0.25	0	0.75	0.262457	Sandstone
4656	900	126.19	-14.1094	0.1	0	-0.1	0.2	0	-0.2	0.3	0	0.262681	Basalt
1570	900	125.532	-14.7227	0	0.5	0.5	0.3	0	-0.05	0.3	0.75	0.262705	Sandstone
637	3600	125.183	-15.0819	0	0.25	0.25	0	0	0	0	0.25	0.263056	Sandstone
2071	2700	125.917	-14.7073	0.3	0.25	-0.05	0.2	0	0.05	0.5	0.5	0.263133	Basalt
2030	2700	125.856	-14.6212	0.2	0	-0.2	0.3	0	-0.3	0.5	0	0.263429	Basalt
2199	6300	126.028	-14.7102	0	0.5	0.5	0.4	0	-0.4	0.4	0.5	0.26357	Sandstone
728	4500	125.433	-15.031	0	0.25	0.25	0.1	0	-0.1	0.1	0.25	0.263574	Sandstone
2787	3600	126.2	-14.5568	0.1	0.5	0.4	0.5	0	-0.5	0.6	0.5	0.263602	Sandstone
3024	1800	126.49	-14.4418	0	0.5	0.5	0.4	0	-0.4	0.4	0.5	0.263664	Sandstone
314	64800	125.279	-15.1351	0.1	0	-0.1	0.1	0	0.15	0.2	0.25	0.263986	Sandstone
468	1800	125.066	-15.0806	0	0.25	0.25	0.3	0	-0.3	0.3	0.25	0.263999	Basalt
2922	12600	126.095	-14.4285	0	0.25	0.25	0.3	0	-0.05	0.3	0.25	0.264002	Sandstone
1544	900	125.437	-14.6717	0	0	0	0.3	0	-0.3	0.3	0	0.264066	Sandstone
4808	47700	126.183	-14.0476	0.1	0.5	0.4	0.1	0	-0.1	0.2	0.5	0.264115	Basalt
4303	1525000	126.055	-14.077	0	0.5	0.5	0	0	0	0	0.5	0.264307	Basalt
1616	2700	125.771	-14.7457	0.4	0.5	0.1	0.6	0	-0.35	0.7	0.75	0.264312	Basalt
2027	900	125.854	-14.622	0.2	0	-0.2	0.3	0	-0.3	0.5	0	0.264412	Basalt
3638	1800	126.502	-14.3544	0.2	1	0.8	0.4	0	-0.4	0.6	1	0.264453	Basalt
1445	8100	125.099	-14.6286	0	0	0	0	0	0.25	0	0.25	0.264465	Basalt
456	5400	125.066	-15.088	0	0.25	0.25	0.3	0	-0.3	0.3	0.25	0.264899	Basalt
1817	3600	125.832	-14.6603	0.4	0.25	-0.15	0.2	0	0.05	0.6	0.5	0.265022	Basalt
280	8100	125.301	-15.1951	0	0	0	0.3	0	-0.05	0.3	0.25	0.265454	Sandstone
4802	3600	126.19	-14.0469	0	0	0	0.1	0	-0.1	0.1	0	0.266186	Basalt
2135	19800	125.913	-14.6731	0.3	0	-0.3	0.1	0	-0.1	0.4	0	0.266217	Basalt
3029	1800	126.434	-14.4193	0.1	0.5	0.4	0.5	0	-0.25	0.6	0.5	0.266429	Basalt
283	2700	125.305	-15.1936	0	0.25	0.25	0.3	0	-0.3	0.3	0.25	0.266743	Sandstone
3229	5400	126.006	-14.3053	0	0	0	0.1	0	0.15	0.1	0.25	0.26701	Basalt
1900	25200	125.825	-14.6393	0.3	0.25	-0.05	0.4	0	-0.15	0.6	0.5	0.267159	Basalt
4199	900	126.532	-14.1653	0.1	0.25	0.15	0.3	0	-0.3	0.4	0.25	0.267286	Sandstone
1987	3600	125.887	-14.6287	0.1	0	-0.1	0.3	0	-0.3	0.4	0	0.267505	Basalt
61	1800	125.036	-15.208	0	0.25	0.25	0.2	0	-0.2	0.2	0.25	0.267586	Basalt
4435	9900	126.111	-14.0539	0	0	0	0	0	0	0	0	0.267683	Laterite
207	8100	125.208	-15.173	0.1	0	-0.1	0.2	0	0.05	0.3	0.25	0.267774	Basalt
2801	23400	126.47	-14.4966	0.1	0.5	0.4	0.5	0	-0.25	0.6	0.5	0.267958	Sandstone
2747	13500	126.103	-14.5393	0.2	0.25	0.05	0.3	0	-0.05	0.5	0.5	0.268176	Sandstone
466	900	125.046	-15.0845	0	0.25	0.25	0.3	0	-0.3	0.3	0.25	0.268459	Basalt
5066	15300	126.11	-13.9672	0	0.25	0.25	0.1	0	-0.1	0.1	0.25	0.268547	Laterite
4144	900	126.481	-14.1666	0.1	0.25	0.15	0.3	0	-0.3	0.4	0.25	0.2687	Sandstone
1372	2700	125.93	-14.7599	0.4	0.25	-0.15	0.4	0	-0.15	0.7	0.5	0.268702	Basalt
1359	9000	125.926	-14.7693	0.4	0.25	-0.15	0.3	0	-0.05	0.7	0.5	0.269386	Basalt
320	1800	125.03	-15.1247	0	0.25	0.25	0.3	0	-0.3	0.3	0.25	0.269704	Basalt
746	13500	125.439	-15.006	0	0	0	0.2	0	-0.2	0.2	0	0.2698	Sandstone
130	1800	125.033	-15.1583	0	0	0	0.2	0	-0.2	0.2	0	0.269842	Basalt
3536	900	126.345	-14.3598	0	0.25	0.25	0.4	0	-0.4	0.4	0.25	0.269887	Sandstone
3300	900	126.112	-14.3432	0.1	0	-0.1	0.2	0	-0.2	0.3	0	0.269953	Sandstone
2661	69300	126.054	-14.5789	0	1	1	0.6	0	-0.35	0.6	1	0.270034	Sandstone
4786	180000	126.172	-14.0567	0	0.25	0.25	0.1	0	-0.1	0.1	0.25	0.270332	Basalt
5064	1800	126.093	-13.9668	0	0.25	0.25	0.1	0	-0.1	0.1	0.25	0.270752	Laterite
630	5400	125.178	-15.0841	0	0	0	0.1	0	-0.1	0.1	0	0.270776	Sandstone
3385	16200	126.034	-14.3137	0	0	0	0.2	0	0.05	0.2	0.25	0.270933	Basalt
4223	4500	125.998	-14.0567	0	0	0	0	0	0	0	0	0.270933	Laterite
3645	1800	126.468	-14.3516	0.1	0.5	0.4	0.3	0	-0.3	0.4	0.5	0.27101	Sandstone
3383	8100	126.014	-14.316	0	0	0	0.1	0	0.15	0.1	0.25	0.271181	Basalt
614	1800	125.232	-15.0881	0	0	0	0	0	0	0	0	0.271252	Sandstone
2734	8100	126.06	-14.5494	0	1	1	0.7	0	-0.45	0.7	1	0.271322	Sandstone
2167	66600	125.893	-14.6263	0.1	0	-0.1	0.3	0	-0.3	0.4	0	0.271452	Basalt
321	1800	125.056	-15.1243	0	0.25	0.25	0.3	0	-0.3	0.3	0.25	0.271486	Basalt
5246	25200	126.203	-13.9741	0	0.25	0.25	0	0	0	0	0.25	0.271589	Basalt
2022	4500	125.846	-14.6229	0.2	0.25	0.05	0.2	0	0.05	0.4	0.5	0.271628	Basalt
2872	13500	125.841	-14.4722	0.1	0.25	0.15	0.1	0	-0.1	0.2	0.25	0.27196	Basalt
4368	8100	126.121	-14.0703	0.1	0.25	0.15	0.1	0	-0.1	0.2	0.25	0.272032	Laterite
1235	1800	125.647	-14.771	0.1	0	-0.1	0.2	0	-0.2	0.3	0	0.272162	Sandstone
1603	1800	125.72	-14.6412	0.3	0.5	0.2	0.1	0	-0.1	0.4	0.5	0.272208	Sandstone
86	4500	125.002	-15.1857	0	0	0	0.2	0	-0.2	0.2	0	0.272231	Basalt
2754	1800	126.066	-14.5297	0	0.25	0.25	0.3	0	-0.3	0.3	0.25	0.272555	Sandstone
1069	8100	125.773	-14.9382	0.4	0.5	0.1	0.4	0	0.1	0.8	0.75	0.272664	Basalt
4498	6300	126.114	-14.0402	0	0	0	0	0	0	0	0	0.273069	Laterite
4404	3600	126.079	-14.0607	0	0	0	0	0	0	0	0	0.27307	Basalt
1486	1800	125.281	-14.7222	0.1	0.25	0.15	0.2	0	0.05	0.3	0.5	0.273309	Sandstone
5202	11700	126.085	-13.9066	0	0	0	0.1	0	-0.1	0.1	0	0.273392	Basalt
884	17100	125.321	-14.8909	0	0.5	0.5	0.2	0	0.05	0.2	0.75	0.273428	Sandstone
1664	30600	125.858	-14.7143	0.1	0.5	0.4	0.4	0	-0.15	0.5	0.75	0.273612	Basalt
5061	4500	126.097	-13.9684	0	0	0	0	0	0	0	0	0.273973	Basalt
183	900	125.242	-15.2147	0.1	0.25	0.15	0.3	0	-0.05	0.3	0.5	0.27421	Sandstone
576	17100	125.251	-15.1173	0	0	0	0.1	0	0.15	0.1	0.25	0.27436	Sandstone
2911	2700	126.123	-14.4389	0	0.25	0.25	0.4	0	-0.15	0.4	0.5	0.27477	Sandstone
4704	62100	126.172	-14.1028	0.1	0.25	0.15	0.3	0	-0.3	0.4	0.25	0.275279	Basalt
1801	7200	125.782	-14.6655	0.3	0.5	0.2	0.4	0	-0.15	0.6	0.75	0.277356	Basalt
4340	13500	126.106	-14.0745	0.1	0	-0.1	0.1	0	-0.1	0.2	0	0.277409	Basalt
378	9000	125.045	-15.1084	0	0.25	0.25	0.3	0	-0.3	0.3	0.25	0.277748	Basalt
2874	11700	125.84	-14.4708	0.1	0.25	0.15	0.1	0	-0.1	0.2	0.25	0.277858	Basalt
1339	2700	125.891	-14.8023	0.4	0.5	0.1	0.2	0	0.05	0.6	0.75	0.27841	Basalt
1577	2700	125.761	-14.7424	0.4	0.5	0.1	0.3	0	-0.05	0.5	0.75	0.278654	Basalt
4437	4500	126.036	-14.0543	0	0	0	0	0	0	0	0	0.278816	Basalt
3912	11700	125.739	-14.1887	0	0	0	0	0	0	0	0	0.279115	Basalt
4369	900	126.114	-14.0698	0.1	0	-0.1	0.1	0	-0.1	0.2	0	0.279527	Basalt
2950	1800	126.04	-14.3891	0	0	0	0.2	0	-0.2	0.2	0	0.279585	Sandstone
4136	4500	126.406	-14.1921	0.1	0.25	0.15	0.5	0	-0.25	0.6	0.5	0.279676	Sandstone
1526	1800	125.429	-14.747	0.1	0.5	0.4	0.5	0	-0.5	0.6	0.5	0.279736	Sandstone
2889	1800	125.993	-14.4364	0	0	0	0.2	0	-0.2	0.2	0	0.279929	Basalt
2729	1800	126.029	-14.5532	0	0.75	0.75	0.6	0	-0.35	0.6	1	0.280049	Sandstone
797	18000	125.371	-14.9937	0	0.25	0.25	0.2	0	0.05	0.2	0.5	0.280388	Basalt
650	3600	125.193	-15.067	0	0	0	0	0	0	0	0	0.280468	Sandstone
1948	1800	125.821	-14.6335	0.3	0.5	0.2	0.4	0	-0.15	0.6	0.75	0.280522	Basalt
4244	900	125.994	-14.0399	0	0	0	0	0	0	0	0	0.280661	Laterite
3704	900	126.491	-14.307	0.2	0.25	0.05	0.3	0	-0.3	0.5	0.25	0.280998	Basalt
3538	3600	126.348	-14.357	0	0	0	0.4	0	-0.4	0.4	0	0.281264	Sandstone
2833	900	125.804	-14.4911	0.1	0.5	0.4	0.2	0	-0.2	0.3	0.5	0.281387	Basalt
1187	1800	125.637	-14.8504	0.1	0.25	0.15	0.6	0	-0.35	0.6	0.5	0.28154	Sandstone
4774	7200	126.149	-14.0667	0	0	0	0.1	0	-0.1	0.1	0	0.281731	Basalt
4240	31500	125.997	-14.0417	0	0	0	0	0	0	0	0	0.281933	Basalt
1580	1800	125.66	-14.7386	0.1	0.5	0.4	0.1	0	-0.1	0.2	0.5	0.282096	Sandstone
4140	15300	126.415	-14.1899	0.1	0	-0.1	0.4	0	-0.15	0.5	0.25	0.282343	Sandstone
1320	1800	125.933	-14.8257	0.3	0.5	0.2	0.5	0	-0.25	0.6	0.75	0.282469	Basalt
3410	13500	126.084	-14.2974	0.1	0	-0.1	0.1	0	-0.1	0.2	0	0.282641	Sandstone
4266	2700	126.001	-14.0252	0	0	0	0	0	0	0	0	0.283013	Basalt
2283	13500	126.111	-14.6202	0.1	0.5	0.4	0.6	0	-0.6	0.6	0.5	0.283119	Sandstone
3412	900	126.078	-14.2935	0	0	0	0.2	0	-0.2	0.2	0	0.283375	Sandstone
1121	11700	125.315	-14.8495	0	0.25	0.25	0.2	0	0.05	0.2	0.5	0.283611	Sandstone
1232	2700	125.654	-14.7747	0.1	0.25	0.15	0.2	0	-0.2	0.3	0.25	0.283829	Sandstone
1462	900	125.222	-14.6858	0	0.25	0.25	0.1	0	-0.1	0.1	0.25	0.284413	Sandstone
1269	2700	125.771	-14.8323	0.4	0.25	-0.15	0.3	0	-0.05	0.6	0.5	0.284527	Basalt
3190	900	125.988	-14.3233	0	0	0	0	0	0	0	0	0.284565	Basalt
181	900	125.187	-15.2185	0.2	0.25	0.05	0.1	0	0.15	0.3	0.5	0.284656	Sandstone
3649	3600	126.415	-14.349	0.2	0.5	0.3	0.4	0	-0.4	0.6	0.5	0.284907	Basalt
1709	1800	125.761	-14.6987	0.4	0.75	0.35	0.4	0	0.1	0.5	1	0.285035	Basalt
3122	4500	125.689	-14.3173	0.1	0.5	0.4	0	0	0	0.1	0.5	0.285519	Basalt
599	3600	125.181	-15.0983	0	0.25	0.25	0	0	0	0	0.25	0.28562	Sandstone
723	60300	125.421	-15.0557	0.1	0.25	0.15	0.2	0	0.05	0.3	0.5	0.285663	Coastal
2954	2700	126.021	-14.3888	0	0.25	0.25	0.1	0	-0.1	0.1	0.25	0.285721	Basalt
1796	3600	125.846	-14.6662	0.5	0.5	0	0.2	0	0.05	0.6	0.75	0.286191	Basalt
5073	900	126.077	-13.9632	0	0.25	0.25	0.1	0	-0.1	0.1	0.25	0.286302	Laterite
3806	1800	126.402	-14.2721	0.1	0.25	0.15	0.2	0	0.05	0.3	0.5	0.286696	Sandstone
2831	2700	125.804	-14.4924	0.1	0.5	0.4	0.2	0	-0.2	0.3	0.5	0.287822	Basalt
123	2700	125.086	-15.1622	0.1	0.5	0.4	0.2	0	-0.2	0.3	0.5	0.287885	Sandstone
4751	132300	126.181	-14.0732	0	0.25	0.25	0	0	0	0	0.25	0.288161	Basalt
4022	900	126.196	-14.128	0.1	0	-0.1	0.1	0	-0.1	0.2	0	0.288304	Basalt
1477	6300	125.33	-14.7305	0.1	0.5	0.4	0.1	0	-0.1	0.2	0.5	0.288304	Sandstone
3393	2700	126.021	-14.3113	0	0	0	0.1	0	0.15	0.1	0.25	0.288551	Basalt
570	2700	125.024	-15.0079	0	0.25	0.25	0.3	0	-0.3	0.3	0.25	0.288833	Basalt
3128	1800	125.652	-14.2576	0.1	0	-0.1	0	0	0.25	0.1	0.25	0.288876	Basalt
4853	18000	126.176	-14.0329	0.1	0.5	0.4	0.1	0	-0.1	0.2	0.5	0.288983	Laterite
5081	18900	126.071	-13.958	0	0	0	0.1	0	-0.1	0.1	0	0.289343	Laterite
1245	900	125.7	-14.7604	0.3	0.5	0.2	0	0	0.25	0.3	0.75	0.289566	Sandstone
3220	900	125.991	-14.3092	0	0	0	0	0	0	0	0	0.29011	Basalt
1517	1800	125.365	-14.6685	0.1	0.5	0.4	0.3	0	-0.05	0.4	0.5	0.290122	Basalt
2011	900	125.838	-14.6241	0.2	0.25	0.05	0.3	0	-0.05	0.5	0.5	0.290894	Basalt
1810	10800	125.846	-14.6626	0.4	0.5	0.1	0.2	0	0.05	0.6	0.75	0.290938	Basalt
4631	3600	126.207	-14.118	0	0	0	0.3	0	-0.3	0.3	0	0.290989	Basalt
5172	175500	126.104	-13.9324	0	0	0	0	0	0	0	0	0.292471	Basalt
3359	5400	126.016	-14.3225	0	0	0	0.1	0	0.15	0.1	0.25	0.292492	Basalt
1982	1800	125.84	-14.6296	0.2	0.25	0.05	0.2	0	0.05	0.4	0.5	0.292757	Basalt
2936	1800	126.025	-14.4214	0	0	0	0	0	0	0	0	0.292898	Sandstone
4905	1800	126.185	-14.0232	0	0.25	0.25	0.1	0	-0.1	0.1	0.25	0.293393	Basalt
4019	8100	126.18	-14.1297	0.1	0.25	0.15	0.3	0	-0.3	0.4	0.25	0.293411	Basalt
301	14400	125.303	-15.1654	0	0.25	0.25	0.2	0	0.05	0.2	0.5	0.293833	Sandstone
4691	2700	126.139	-14.1047	0.1	0	-0.1	0.1	0	-0.1	0.2	0	0.293893	Basalt
2152	21600	125.895	-14.6399	0.2	0	-0.2	0.3	0	-0.3	0.5	0	0.294123	Basalt
605	1800	125.233	-15.0932	0	0	0	0	0	0	0	0	0.294193	Sandstone
1679	900	125.827	-14.7057	0.1	0.5	0.4	0.4	0	-0.15	0.4	0.75	0.29448	Basalt
4421	900	126.041	-14.0577	0	0.25	0.25	0	0	0	0	0.25	0.295108	Laterite
3351	15300	126.091	-14.3226	0.1	0.25	0.15	0.3	0	-0.3	0.4	0.25	0.295219	Basalt
2877	900	125.838	-14.4672	0.1	0.25	0.15	0.2	0	-0.2	0.3	0.25	0.295566	Basalt
1947	4500	125.818	-14.6331	0.3	0.5	0.2	0.4	0	-0.15	0.6	0.75	0.295634	Basalt
2689	900	126.038	-14.5725	0	0	0	0.2	0	0.05	0.2	0.25	0.296101	Sandstone
1767	1800	125.873	-14.6858	0.2	0.25	0.05	0.2	0	-0.2	0.4	0.25	0.296208	Basalt
1488	3600	125.282	-14.7206	0.1	0.25	0.15	0.2	0	0.05	0.3	0.5	0.296244	Sandstone
3869	900	126.523	-14.2727	0.1	0.75	0.65	0.3	0	-0.05	0.4	1	0.29627	Basalt
1853	2700	125.837	-14.6479	0.3	0.25	-0.05	0.2	0	0.05	0.5	0.5	0.296912	Basalt
3722	2700	126.481	-14.2994	0.2	0.5	0.3	0.3	0	-0.3	0.5	0.5	0.296969	Laterite
1858	29700	125.839	-14.6454	0.3	0.25	-0.05	0.2	0	0.05	0.5	0.5	0.297155	Basalt
106	900	125.065	-15.1719	0.1	0.25	0.15	0.2	0	-0.2	0.3	0.25	0.297398	Coastal
2788	2700	126.198	-14.5561	0.1	0.5	0.4	0.6	0	-0.6	0.7	0.5	0.297553	Sandstone
157	8100	125.051	-15.1335	0	0.25	0.25	0.3	0	-0.3	0.3	0.25	0.297557	Basalt
1799	33300	125.763	-14.6656	0.5	0.75	0.25	0.4	0	-0.4	0.6	0.75	0.297762	Basalt
3751	900	126.512	-14.288	0.1	0.5	0.4	0.3	0	-0.3	0.4	0.5	0.298295	Basalt
297	5400	125.278	-15.1757	0	0.25	0.25	0.1	0	-0.1	0.1	0.25	0.298585	Sandstone
4782	281700	126.149	-14.0611	0	0.25	0.25	0.1	0	-0.1	0.1	0.25	0.298941	Laterite
5103	10800	126.09	-13.9522	0	0	0	0.1	0	-0.1	0.1	0	0.299376	Laterite
1073	4500	125.799	-14.9287	0.2	0.25	0.05	0.4	0	-0.15	0.6	0.5	0.299378	Basalt
2674	3600	126.118	-14.5767	0.1	0.25	0.15	0.3	0	-0.05	0.4	0.5	0.299649	Sandstone
4869	11700	126.18	-14.0287	0	0.25	0.25	0.1	0	-0.1	0.1	0.25	0.299813	Laterite
131	3600	125.034	-15.158	0	0	0	0.2	0	-0.2	0.2	0	0.299904	Basalt
2856	2700	125.835	-14.4789	0.1	0.25	0.15	0.1	0	-0.1	0.2	0.25	0.300007	Basalt
1855	900	125.885	-14.6473	0.2	0	-0.2	0.3	0	-0.3	0.5	0	0.300142	Basalt
563	1800	125.074	-15.0135	0	0	0	0.3	0	-0.3	0.3	0	0.300143	Sandstone
654	900	125.194	-15.0661	0	0	0	0	0	0	0	0	0.300506	Sandstone
4863	7200	126.145	-14.0298	0.1	0.25	0.15	0.1	0	-0.1	0.2	0.25	0.300545	Laterite
4665	900	126.191	-14.1083	0	0	0	0.2	0	-0.2	0.2	0	0.300994	Basalt
4420	8100	126.128	0	0	0	0	0.1	0	-0.1	0.1	0	0.301223	Basalt
2778	2700	126.206	-14.5949	0.1	0.5	0.4	0.6	0	-0.6	0.6	0.5	0.301237	Sandstone
2891	12600	126.01	-14.4086	0	0.25	0.25	0.1	0	-0.1	0.1	0.25	0.301674	Basalt
1243	1800	125.689	-14.762	0.3	0.5	0.2	0.1	0	0.15	0.4	0.5	0.30174	Sandstone
340	23400	125.103	-15.1165	0	0	0	0.3	0	-0.05	0.3	0.25	0.301798	Basalt
3066	6300	125.224	-14.2976	0	0	0	0	0	0	0	0	0.301945	Laterite
293	6300	125.273	-15.1841	0.1	0.25	0.15	0.2	0	-0.2	0.3	0.25	0.302576	Sandstone
4210	84600	126.009	-14.0797	0	0.25	0.25	0	0	0	0	0.25	0.302623	Basalt
1379	4500	126.014	-14.7536	0.1	0.5	0.4	0.5	0	-0.5	0.5	0.5	0.302638	Sandstone
1770	900	125.886	-14.685	0.2	0	-0.2	0.3	0	-0.3	0.5	0	0.302682	Basalt
2334	900	125.181	-14.5674	0	0	0	0.1	0	0.15	0.1	0.25	0.302706	Sandstone
4418	2700	126.015	-14.0589	0	0	0	0	0	0	0	0	0.302772	Basalt
76	1800	125.033	-15.2041	0	0.25	0.25	0.2	0	-0.2	0.2	0.25	0.303179	Basalt
5080	1800	126.125	-13.9572	0	0	0	0	0	0	0	0	0.303252	Basalt
4806	2700	126.186	-14.0467	0	0	0	0.1	0	-0.1	0.1	0	0.304571	Basalt
1257	900	125.694	-14.7539	0.3	0.5	0.2	0.1	0	-0.1	0.4	0.5	0.304601	Sandstone
3524	900	126.171	-14.266	0	0.25	0.25	0.3	0	-0.3	0.3	0.25	0.304649	Sandstone
3123	1800	125.688	-14.3162	0.1	0.75	0.65	0	0	0	0.1	0.75	0.304771	Basalt
4614	32400	126.119	-14.0052	0.1	0	-0.1	0	0	0	0.1	0	0.305203	Basalt
4250	21600	125.982	-14.0366	0	0.25	0.25	0	0	0	0	0.25	0.305976	Basalt
3482	31500	126.161	-14.3055	0.1	0.5	0.4	0.4	0	-0.4	0.5	0.5	0.306032	Sandstone
2372	43200	125.755	-14.5977	0.4	0.75	0.35	0.2	0	-0.2	0.6	0.75	0.306159	Basalt
3844	17100	126.449	-14.2521	0.3	0.75	0.45	0.4	0	-0.15	0.7	1	0.306843	Basalt
346	1800	125.056	-15.1147	0	0.25	0.25	0.3	0	-0.3	0.3	0.25	0.307337	Basalt
5204	26100	126.088	-13.9034	0	0	0	0.1	0	-0.1	0.1	0	0.30743	Laterite
3428	900	126.092	-14.27	0.1	0	-0.1	0.3	0	-0.3	0.4	0	0.30745	Sandstone
1220	14400	125.641	-14.7888	0.1	0	-0.1	0.4	0	-0.15	0.4	0.25	0.307528	Sandstone
947	16200	125.403	-14.9609	0	0	0	0.1	0	-0.1	0.1	0	0.307749	Sandstone
3821	1800	126.403	-14.264	0.1	0.25	0.15	0.4	0	-0.15	0.5	0.5	0.307789	Sandstone
3219	900	125.993	-14.3095	0	0	0	0	0	0	0	0	0.308114	Basalt
347	900	125.056	-15.1143	0	0.25	0.25	0.3	0	-0.3	0.3	0.25	0.308754	Basalt
1728	4500	125.843	-14.6915	0.3	0.5	0.2	0.4	0	-0.15	0.6	0.75	0.309502	Basalt
3306	1800	126.012	-14.3401	0	0	0	0.1	0	0.15	0.1	0.25	0.309721	Basalt
700	80100	125.359	-15.0048	0	0.25	0.25	0.2	0	-0.2	0.2	0.25	0.309965	Basalt
250	3600	125.294	-15.2403	0.1	0.25	0.15	0.2	0	0.05	0.2	0.5	0.310595	Sandstone
2423	29700	125.806	-14.6163	0.4	0.5	0.1	0.4	0	-0.15	0.7	0.75	0.311403	Basalt
248	1800	125.242	-15.1254	0.1	0	-0.1	0	0	0.25	0.1	0.25	0.311673	Sandstone
3666	900	126.51	-14.3352	0.1	0.5	0.4	0.4	0	-0.15	0.5	0.75	0.311958	Basalt
1957	900	125.845	-14.6324	0.2	0.25	0.05	0.3	0	-0.3	0.4	0.25	0.312058	Basalt
2675	14400	126.122	-14.5773	0.1	0.5	0.4	0.4	0	-0.4	0.5	0.5	0.312581	Sandstone
2417	1800	125.794	-14.6163	0.4	0.5	0.1	0.2	0	0.05	0.6	0.75	0.312673	Basalt
881	3600	125.345	-14.8903	0.1	0.25	0.15	0.4	0	-0.15	0.5	0.5	0.312829	Alluvium and colluvium
373	31500	125.055	-15.1098	0	0.25	0.25	0.3	0	-0.3	0.3	0.25	0.313109	Basalt
2002	8100	125.829	-14.6261	0.2	0.5	0.3	0.4	0	-0.15	0.6	0.75	0.313613	Basalt
5029	12600	126.121	-13.9873	0.1	0.25	0.15	0	0	0	0.1	0.25	0.314111	Laterite
4743	3600	126.158	-14.0788	0	0	0	0.1	0	-0.1	0.1	0	0.31426	Basalt
1218	1800	125.687	-14.7905	0.3	0.25	-0.05	0.1	0	0.15	0.4	0.5	0.31442	Sandstone
3126	2700	125.665	-14.2672	0.1	0.25	0.15	0	0	0.25	0.1	0.5	0.314658	Sandstone
3184	5400	125.988	-14.3248	0	0	0	0	0	0	0	0	0.314945	Basalt
1533	8100	125.386	-14.7035	0.1	0.75	0.65	0.3	0	-0.3	0.4	0.75	0.31508	Sandstone
1399	1800	125.914	-14.7444	0.5	0.25	-0.25	0.4	0	0.1	0.7	0.75	0.315281	Basalt
4445	541800	126.023	-14.0584	0	0.25	0.25	0	0	0	0	0.25	0.315342	Laterite
3133	3600	125.984	-14.3677	0	0	0	0	0	0	0	0	0.315883	Sandstone
2235	2700	126.025	-14.656	0	0.25	0.25	0.3	0	-0.05	0.3	0.5	0.315924	Sandstone
965	6300	125.453	-14.9453	0	0	0	0.2	0	-0.2	0.2	0	0.317258	Sandstone
5207	8100	126.16	-13.9913	0	0.25	0.25	0	0	0	0	0.25	0.317439	Basalt
4310	1804000	126.121	-14.0869	0.1	0.5	0.4	0.1	0	-0.1	0.2	0.5	0.318019	Laterite
924	11700	125.396	-14.9804	0	0	0	0.1	0	0.15	0.1	0.25	0.318081	Basalt
2017	900	125.82	-14.6235	0.3	0.5	0.2	0.4	0	-0.15	0.7	0.75	0.318127	Laterite
1528	1800	125.48	-14.7351	0	0	0	0.2	0	0.05	0.2	0.25	0.318277	Sandstone
1077	3600	125.82	-14.8997	0.4	0.25	-0.15	0.5	0	0	0.8	0.75	0.318595	Laterite
733	900	125.403	-15.0238	0.1	0	-0.1	0.1	0	0.15	0.2	0.25	0.318633	Sandstone
4208	900	125.698	-14.119	0	0	0	0	0	0	0	0	0.318648	Basalt
880	19800	125.318	-14.8939	0	0.5	0.5	0.2	0	0.05	0.2	0.75	0.318817	Sandstone
3680	900	126.5	-14.3218	0.1	0.5	0.4	0.4	0	-0.15	0.5	0.75	0.318826	Basalt
4264	900	126.001	-14.0268	0	0	0	0	0	0	0	0	0.318908	Basalt
1360	900	125.956	-14.767	0.2	0.25	0.05	0.5	0	-0.25	0.7	0.5	0.31914	Sandstone
840	900	125.281	-14.9516	0	0	0	0.1	0	-0.1	0.1	0	0.319782	Basalt
2721	27900	126.117	-14.5566	0.1	0.5	0.4	0.4	0	-0.15	0.5	0.75	0.319911	Sandstone
4554	58500	126.035	-14.0262	0	0	0	0	0	0	0	0	0.319947	Basalt
4901	9900	126.217	-14.0241	0	0	0	0.1	0	-0.1	0.1	0	0.320103	Basalt
4887	13500	126.192	-14.0261	0	0.25	0.25	0.1	0	-0.1	0.1	0.25	0.320155	Laterite
2212	9900	126.099	-14.6926	0	0.5	0.5	0.5	0	-0.5	0.5	0.5	0.32036	Sandstone
807	900	125.333	-14.9858	0	0.25	0.25	0.1	0	0.15	0.1	0.5	0.320543	Coastal
4096	3600	126.487	-14.2257	0.2	0.75	0.55	0.3	0	-0.3	0.5	0.75	0.320597	Basalt
4442	84600	126.053	-14.0553	0	0.25	0.25	0	0	0	0	0.25	0.320825	Laterite
3750	900	126.512	-14.288	0.1	0.5	0.4	0.3	0	-0.3	0.4	0.5	0.320967	Basalt
1185	5400	125.679	-14.8524	0	0.25	0.25	0.6	0	-0.35	0.6	0.5	0.321285	Sandstone
2836	900	125.818	-14.4872	0.1	0.25	0.15	0.2	0	-0.2	0.3	0.25	0.321407	Basalt
1891	6300	125.882	-14.6398	0.2	0.25	0.05	0.3	0	-0.3	0.5	0.25	0.321994	Basalt
4861	1800	126.163	-14.0297	0.1	0.5	0.4	0.1	0	-0.1	0.2	0.5	0.322451	Laterite
3258	900	126.096	-14.3634	0	0.25	0.25	0.3	0	-0.3	0.3	0.25	0.322489	Sandstone
3683	1800	126.454	-14.3212	0.1	0.75	0.65	0.4	0	-0.4	0.5	0.75	0.322606	Laterite
2231	4500	126.033	-14.6624	0	0.5	0.5	0.3	0	-0.3	0.3	0.5	0.322919	Sandstone
872	900	125.319	-14.9041	0	0.25	0.25	0.2	0	-0.2	0.2	0.25	0.322978	Basalt
3403	3600	126.015	-14.3074	0	0	0	0.1	0	0.15	0.1	0.25	0.323096	Basalt
3665	2700	126.507	-14.3357	0.1	0.5	0.4	0.4	0	-0.15	0.5	0.75	0.323286	Basalt
2827	900	125.819	-14.4945	0.1	0.25	0.15	0.2	0	-0.2	0.3	0.25	0.323334	Basalt
4055	900	126.273	-14.2107	0	0	0	0	0	0	0	0	0.323985	Sandstone
2074	39600	125.914	-14.7085	0.3	0.25	-0.05	0.2	0	0.05	0.5	0.5	0.324186	Basalt
323	900	125.089	-15.1229	0	0.25	0.25	0.3	0	-0.3	0.3	0.25	0.32424	Basalt
1156	1800	125.474	-14.7514	0	0	0	0.2	0	0.05	0.2	0.25	0.32433	Sandstone
4682	3600	126.199	-14.1062	0	0	0	0.2	0	-0.2	0.2	0	0.324709	Basalt
5214	25200	126.186	-13.9846	0	0	0	0	0	0	0	0	0.325054	Laterite
768	17100	125.248	-14.9445	0	0	0	0	0	0	0	0	0.325273	Sandstone
3493	900	126.138	-14.296	0.1	0.5	0.4	0.3	0	-0.3	0.4	0.5	0.325869	Sandstone
1237	3600	125.642	-14.7699	0.1	0	-0.1	0.1	0	-0.1	0.2	0	0.325898	Sandstone
3754	4500	126.512	-14.2872	0.1	0.5	0.4	0.3	0	-0.3	0.4	0.5	0.326047	Basalt
1845	4500	125.839	-14.6487	0.3	0.25	-0.05	0.2	0	0.05	0.5	0.5	0.326099	Basalt
1914	6300	125.818	-14.6375	0.4	0.5	0.1	0.4	0	-0.15	0.6	0.75	0.326277	Basalt
204	4500	125.158	-15.1812	0.1	0.25	0.15	0.3	0	-0.3	0.3	0.25	0.326497	Sandstone
4279	7200	125.995	-14.0162	0	0	0	0	0	0	0	0	0.326727	Basalt
4862	7200	126.136	-14.0298	0.1	0.25	0.15	0.1	0	-0.1	0.2	0.25	0.326753	Basalt
569	11700	125.02	-15.0094	0	0.25	0.25	0.1	0	-0.1	0.1	0.25	0.327047	Basalt
328	900	125.108	-15.1211	0	0	0	0.3	0	-0.05	0.3	0.25	0.327148	Basalt
3267	1800	126.082	-14.3594	0	0.25	0.25	0.4	0	-0.4	0.4	0.25	0.327741	Sandstone
3827	1800	126.457	-14.2598	0.2	0.75	0.55	0.4	0	-0.15	0.6	1	0.327847	Laterite
1940	1800	125.849	-14.634	0.3	0.25	-0.05	0.3	0	-0.3	0.5	0.25	0.32809	Basalt
5014	43200	126.034	-13.9924	0	0.25	0.25	0	0	0	0	0.25	0.328132	Basalt
1815	6300	125.828	-14.6612	0.3	0.25	-0.05	0.1	0	0.15	0.4	0.5	0.328228	Basalt
4613	246600	126.061	-14.0078	0	0.5	0.5	0	0	0	0	0.5	0.328554	Basalt
3477	10800	126.226	-14.3076	0	0.25	0.25	0.3	0	-0.3	0.3	0.25	0.328591	Sandstone
2604	900	126.086	-14.6133	0.1	0.25	0.15	0.5	0	-0.25	0.5	0.5	0.328995	Sandstone
327	9000	125.083	-15.1214	0	0.25	0.25	0.3	0	-0.3	0.3	0.25	0.329265	Basalt
4186	1800	126.548	-14.1969	0.1	0.75	0.65	0.3	0	-0.3	0.4	0.75	0.329844	Sandstone
2331	1800	125.205	-14.5844	0	0	0	0.1	0	0.15	0.1	0.25	0.330016	Sandstone
1281	5400	125.887	-14.7966	0.5	0.5	0	0.3	0	-0.05	0.7	0.5	0.330123	Basalt
1080	43200	125.809	-14.8902	0.6	0.25	-0.35	0.4	0	0.1	0.9	0.75	0.330182	Basalt
311	6300	125.281	-15.15	0	0	0	0.2	0	-0.2	0.2	0	0.330506	Sandstone
5194	37800	126.076	-13.9161	0	0	0	0.1	0	-0.1	0.1	0	0.330848	Laterite
1777	900	125.83	-14.6792	0.4	0.25	-0.15	0.2	0	-0.2	0.5	0.25	0.330977	Basalt
3587	900	126.388	-14.3028	0.3	0.5	0.2	0.3	0	-0.3	0.6	0.5	0.331013	Basalt
102	2700	125.006	-15.1732	0	0	0	0.2	0	-0.2	0.2	0	0.331153	Basalt
2443	900	125.808	-14.6114	0.4	0.5	0.1	0.4	0	-0.15	0.7	0.75	0.331186	Basalt
1507	12600	125.282	-14.6868	0.1	0.25	0.15	0	0	0.25	0.1	0.5	0.33228	Basalt
1387	900	126.01	-14.7522	0	0.5	0.5	0.5	0	-0.5	0.5	0.5	0.332579	Sandstone
2326	1800	125.197	-14.5882	0	0.25	0.25	0.1	0	0.15	0.1	0.5	0.332666	Sandstone
136	5400	125.041	-15.1564	0	0	0	0.2	0	-0.2	0.2	0	0.332776	Basalt
4431	28800	126.041	-14.0543	0	0.25	0.25	0	0	0	0	0.25	0.333205	Basalt
9	5400	125.236	-15.2539	0.1	0.25	0.15	0.1	0	0.15	0.2	0.5	0.333246	Sandstone
4432	9000	126.09	-14.0547	0	0	0	0	0	0	0	0	0.333989	Basalt
4041	45900	126.184	-14.1221	0.1	0	-0.1	0.3	0	-0.3	0.4	0	0.33406	Basalt
264	900	125.314	-15.2115	0	0.25	0.25	0.2	0	-0.2	0.2	0.25	0.33418	Sandstone
2798	5400	126.485	-14.5026	0	0.25	0.25	0.3	0	-0.05	0.3	0.5	0.334394	Sandstone
3690	5400	126.449	-14.3176	0.1	0.75	0.65	0.4	0	-0.4	0.5	0.75	0.334433	Laterite
2227	3600	126.111	-14.6712	0.1	0.75	0.65	0.6	0	-0.6	0.7	0.75	0.334517	Sandstone
4539	900	126.054	-14.0313	0	0.25	0.25	0	0	0	0	0.25	0.334597	Basalt
5206	7200	126.091	-13.898	0	0	0	0	0	0	0	0	0.334844	Laterite
4674	7200	126.15	-14.1079	0.1	0.25	0.15	0.1	0	-0.1	0.2	0.25	0.335451	Basalt
3867	1800	126.522	-14.2923	0.1	0.25	0.15	0.3	0	-0.3	0.4	0.25	0.336417	Basalt
2254	900	126.036	-14.6476	0	0.25	0.25	0.3	0	-0.05	0.3	0.5	0.33653	Sandstone
2923	11700	126.022	-14.4263	0	0	0	0.1	0	-0.1	0.1	0	0.336573	Sandstone
2474	4500	125.768	-14.5876	0.4	0.75	0.35	0.2	0	-0.2	0.6	0.75	0.336705	Basalt
4742	7200	126.159	-14.0801	0	0	0	0.1	0	-0.1	0.1	0	0.336747	Basalt
1750	900	125.882	-14.6885	0.2	0.25	0.05	0.3	0	-0.3	0.5	0.25	0.336843	Basalt
423	900	125.038	-15.0944	0	0.25	0.25	0.2	0	-0.2	0.2	0.25	0.336844	Basalt
4337	173700	126.136	-14.0761	0.1	0.25	0.15	0.1	0	-0.1	0.2	0.25	0.336935	Laterite
729	32400	125.385	-15.0316	0.1	0	-0.1	0.1	0	0.15	0.2	0.25	0.337356	Sandstone
2794	1800	126.146	-14.5215	0.1	0.75	0.65	0.5	0	-0.5	0.6	0.75	0.337361	Basalt
1783	17100	125.852	-14.6753	0.3	0.25	-0.05	0.2	0	0.05	0.5	0.5	0.337401	Basalt
3352	4500	126.044	-14.3234	0	0	0	0.1	0	-0.1	0.1	0	0.337738	Basalt
1402	39600	126.049	-14.8364	0.1	0.5	0.4	0.6	0	-0.6	0.7	0.5	0.338562	Sandstone
3457	2700	126.142	-14.35	0.1	0	-0.1	0.3	0	-0.05	0.4	0.25	0.338824	Sandstone
2009	1800	125.84	-14.6244	0.2	0.25	0.05	0.3	0	-0.05	0.5	0.5	0.339111	Basalt
5222	3600	126.217	-13.9824	0	0	0	0	0	0	0	0	0.339312	Basalt
1244	900	125.701	-14.7612	0.3	0.5	0.2	0	0	0.25	0.3	0.75	0.339433	Sandstone
1342	2700	125.889	-14.7998	0.4	0.75	0.35	0.3	0	-0.05	0.6	0.75	0.339739	Basalt
4722	1109000	126.162	-14.0847	0	0.25	0.25	0.1	0	-0.1	0.1	0.25	0.339881	Laterite
3458	63000	126.142	-14.3505	0.1	0.25	0.15	0.3	0	-0.05	0.4	0.5	0.340238	Sandstone
3540	1800	126.344	-14.3531	0	0	0	0.4	0	-0.4	0.4	0	0.340574	Sandstone
5265	18900	126.167	-13.9543	0	0	0	0	0	0	0	0	0.340855	Laterite
1607	900	125.686	-14.6394	0.5	0.25	-0.25	0.2	0	0.05	0.6	0.5	0.341051	Sandstone
1924	900	125.828	-14.6356	0.3	0.5	0.2	0.3	0	-0.05	0.5	0.75	0.342012	Basalt
3941	6300	125.704	-14.1345	0	0	0	0	0	0	0	0	0.342013	Basalt
782	5400	125.245	-14.9169	0	0	0	0	0	0	0	0	0.342095	Sandstone
1412	112500	126.048	-14.8057	0.1	0.5	0.4	0.5	0	-0.5	0.6	0.5	0.342188	Sandstone
4483	10800	126.062	-14.0454	0	0	0	0	0	0	0	0	0.34244	Basalt
197	1800	125.224	-15.1878	0.1	0.25	0.15	0.2	0	0.05	0.3	0.5	0.342448	Sandstone
2062	2700	125.9	-14.729	0.3	0.25	-0.05	0.2	0	0.3	0.5	0.75	0.342453	Basalt
3822	4500	126.451	-14.2629	0.2	0.75	0.55	0.4	0	-0.15	0.6	1	0.342694	Basalt
1579	11700	125.661	-14.7414	0.1	0.5	0.4	0.1	0	-0.1	0.2	0.5	0.3432	Sandstone
324	2700	125.075	-15.1229	0	0	0	0.3	0	-0.3	0.3	0	0.343373	Basalt
1085	53100	125.826	-14.8862	0.4	0.25	-0.15	0.4	0	0.1	0.7	0.75	0.343388	Laterite
2106	1800	125.911	-14.6924	0.3	0	-0.3	0.2	0	0.05	0.5	0.25	0.343585	Basalt
1268	13500	125.802	-14.8332	0.3	0.25	-0.05	0.4	0	0.1	0.7	0.75	0.343618	Basalt
2513	3600	125.809	-14.5442	0.2	0.5	0.3	0.3	0	0.2	0.5	0.75	0.343716	Basalt
3860	1800	126.527	-14.3503	0.4	0.5	0.1	0.4	0	-0.15	0.8	0.75	0.344027	Basalt
4684	18000	126.162	-14.1057	0	0	0	0.1	0	-0.1	0.1	0	0.344528	Basalt
957	900	125.499	-14.9548	0.1	0	-0.1	0.1	0	-0.1	0.2	0	0.345562	Sandstone
2257	4500	126.064	-14.6467	0	0.25	0.25	0.4	0	-0.15	0.4	0.5	0.345755	Sandstone
2278	4500	126.14	-14.6213	0.1	0.25	0.15	0.6	0	-0.6	0.7	0.25	0.34691	Sandstone
2088	28800	125.897	-14.7019	0.3	0.5	0.2	0.3	0	-0.05	0.5	0.75	0.347095	Basalt
3991	3600	126.161	-14.1766	0.1	0.5	0.4	0.4	0	-0.4	0.5	0.5	0.348436	Sandstone
2142	6300	125.889	-14.6491	0.2	0	-0.2	0.2	0	-0.2	0.4	0	0.348746	Basalt
229	6300	125.132	-15.1403	0	0.25	0.25	0.3	0	-0.3	0.3	0.25	0.34909	Sandstone
36	2700	125.089	-15.2212	0.2	0.75	0.55	0.2	0	0.05	0.4	1	0.34927	Basalt
1685	1800	125.86	-14.7029	0.2	0.5	0.3	0.4	0	-0.15	0.6	0.75	0.349303	Basalt
4044	90000	126.163	-14.1209	0.1	0	-0.1	0.2	0	-0.2	0.3	0	0.349376	Basalt
2430	2700	125.87	-14.6137	0.2	0	-0.2	0.3	0	-0.3	0.5	0	0.349608	Basalt
1969	1800	125.845	-14.6313	0.2	0.25	0.05	0.3	0	-0.3	0.4	0.25	0.349709	Basalt
2188	3600	126.022	-14.7239	0	0.25	0.25	0.5	0	-0.5	0.5	0.25	0.349788	Sandstone
3541	900	126.34	-14.3522	0	0	0	0.4	0	-0.15	0.4	0.25	0.349831	Sandstone
4506	40500	126.042	-14.0387	0	0.25	0.25	0	0	0	0	0.25	0.349949	Basalt
1834	31500	125.882	-14.6504	0.2	0	-0.2	0.3	0	-0.3	0.5	0	0.349956	Basalt
1887	7200	125.848	-14.6407	0.3	0.25	-0.05	0.3	0	-0.3	0.5	0.25	0.350482	Basalt
2214	1800	126.085	-14.6919	0	0.75	0.75	0.5	0	-0.5	0.5	0.75	0.350508	Sandstone
3487	48600	126.143	-14.2982	0.1	0.5	0.4	0.4	0	-0.4	0.5	0.5	0.350548	Sandstone
2867	2700	125.839	-14.4741	0.1	0.25	0.15	0.1	0	-0.1	0.2	0.25	0.350633	Basalt
4465	1800	126.065	-14.0483	0	0.25	0.25	0	0	0	0	0.25	0.351111	Basalt
2601	27900	126.105	-14.6151	0.1	0.75	0.65	0.6	0	-0.6	0.7	0.75	0.351457	Sandstone
5275	9900	126.171	-13.9421	0	0	0	0	0	0	0	0	0.35159	Basalt
1217	1800	125.664	-14.7915	0.1	0.25	0.15	0.3	0	-0.3	0.4	0.25	0.3516	Sandstone
4898	55800	126.182	-14.0249	0	0.25	0.25	0.1	0	-0.1	0.1	0.25	0.351629	Basalt
995	11700	125.504	-14.9236	0	0.25	0.25	0.4	0	-0.15	0.4	0.5	0.351877	Sandstone
447	1800	125.045	-15.0902	0	0.25	0.25	0.3	0	-0.3	0.3	0.25	0.352275	Basalt
5166	397800	126.085	-13.9345	0	0.25	0.25	0.1	0	-0.1	0.1	0.25	0.352336	Basalt
2671	1800	126.111	-14.5772	0.1	0.25	0.15	0.2	0	0.05	0.3	0.5	0.352522	Sandstone
1413	900	126.029	-14.8007	0.2	0.5	0.3	0.4	0	-0.4	0.6	0.5	0.352625	Sandstone
2350	7200	125.263	-14.6115	0	0.25	0.25	0.1	0	-0.1	0.1	0.25	0.352998	Sandstone
2159	77400	125.898	-14.6367	0.2	0	-0.2	0.3	0	-0.05	0.5	0.25	0.353825	Basalt
4430	7200	126.039	-14.0561	0	0	0	0	0	0	0	0	0.354138	Basalt
3947	900	125.784	-14.1581	0	0	0	0	0	0	0	0	0.354285	Laterite
2004	783900	125.863	-14.6226	0.2	0.25	0.05	0.3	0	-0.3	0.5	0.25	0.35453	Basalt
579	8100	125.194	-15.1152	0	0.25	0.25	0	0	0	0	0.25	0.354655	Sandstone
3221	7200	126.003	-14.3085	0	0	0	0.1	0	0.15	0.1	0.25	0.354981	Basalt
313	18900	125.279	-15.1395	0.1	0	-0.1	0.1	0	0.15	0.2	0.25	0.355115	Sandstone
2871	5400	125.827	-14.4723	0.1	0.25	0.15	0.1	0	-0.1	0.2	0.25	0.355868	Basalt
1744	4500	125.844	-14.6893	0.3	0.5	0.2	0.4	0	-0.15	0.6	0.75	0.356213	Basalt
4979	3600	126.062	-13.9944	0	0	0	0	0	0	0	0	0.356249	Basalt
1535	2700	125.382	-14.6968	0.1	0.75	0.65	0.3	0	-0.3	0.4	0.75	0.356385	Basalt
694	41400	125.358	-15.0284	0	0	0	0	0	0	0	0	0.356386	Basalt
4712	1800	126.159	-14.0975	0	0	0	0.1	0	-0.1	0.1	0	0.356756	Basalt
926	7200	125.396	-14.979	0	0	0	0.1	0	0.15	0.1	0.25	0.356887	Basalt
1336	900	125.919	-14.8027	0.4	0.5	0.1	0.3	0	-0.05	0.6	0.75	0.356909	Basalt
805	8100	125.342	-14.9861	0	0.25	0.25	0.2	0	0.05	0.2	0.5	0.356945	Sandstone
3000	4500	126.313	-14.3941	0	0.25	0.25	0.3	0	-0.3	0.3	0.25	0.356976	Sandstone
2228	1800	126.112	-14.6712	0.1	0.5	0.4	0.6	0	-0.6	0.7	0.5	0.356986	Sandstone
4759	5400	126.178	-14.073	0	0.25	0.25	0	0	0	0	0.25	0.357058	Basalt
1576	5400	125.69	-14.7433	0.2	0.5	0.3	0.1	0	0.15	0.3	0.75	0.357647	Sandstone
3335	1800	126.075	-14.3298	0	0	0	0.2	0	-0.2	0.2	0	0.357745	Sandstone
5126	32400	126.098	-13.9463	0	0	0	0.1	0	-0.1	0.1	0	0.357943	Laterite
759	2700	125.091	-14.9886	0	0	0	0.1	0	-0.1	0.1	0	0.3583	Sandstone
5298	234000	126.137	-13.9275	0.1	0.25	0.15	0	0	0	0.1	0.25	0.358313	Basalt
3820	900	126.451	-14.2634	0.2	0.75	0.55	0.4	0	-0.15	0.6	1	0.35863	Basalt
4875	900	126.153	-14.0278	0.1	0.25	0.15	0.1	0	-0.1	0.2	0.25	0.358895	Basalt
4467	2700	126.06	-14.0476	0	0	0	0	0	0	0	0	0.358902	Laterite
969	29700	125.389	-14.9431	0	0.25	0.25	0.2	0	-0.2	0.2	0.25	0.358959	Sandstone
1771	11700	125.826	-14.6848	0.3	0.25	-0.05	0.2	0	-0.2	0.5	0.25	0.358966	Basalt
1727	8100	125.82	-14.6918	0.4	0.75	0.35	0.2	0	-0.2	0.5	0.75	0.359097	Basalt
1765	900	125.845	-14.6866	0.3	0.75	0.45	0.4	0	-0.15	0.6	0.75	0.359322	Basalt
2081	11700	126.014	-14.7025	0.1	0.5	0.4	0.3	0	-0.3	0.4	0.5	0.359736	Sandstone
2568	12600	125.804	-14.4973	0.2	0.5	0.3	0.2	0	0.05	0.4	0.5	0.359764	Basalt
2420	60300	125.829	-14.6145	0.3	0.5	0.2	0.4	0	-0.15	0.7	0.75	0.359824	Basalt
2495	900	125.822	-14.556	0.2	0.25	0.05	0.2	0	0.05	0.4	0.5	0.360506	Basalt
2622	4500	126.114	-14.6048	0.2	0.25	0.05	0.3	0	-0.3	0.4	0.25	0.36081	Sandstone
2434	3600	125.845	-14.6129	0.2	0.25	0.05	0.3	0	-0.05	0.5	0.5	0.361159	Basalt
1819	2700	125.852	-14.6585	0.3	0.25	-0.05	0.3	0	-0.3	0.5	0.25	0.36124	Basalt
1730	5400	125.83	-14.6917	0.3	0.5	0.2	0.3	0	-0.3	0.5	0.5	0.362122	Basalt
4053	1800	126.273	-14.2116	0	0	0	0	0	0	0	0	0.362325	Sandstone
4827	900	126.215	-14.0419	0	0	0	0.1	0	-0.1	0.1	0	0.362723	Basalt
1132	2700	125.295	-14.8402	0	0.5	0.5	0.3	0	-0.05	0.3	0.75	0.363788	Sandstone
3339	12600	126.018	-14.3296	0	0	0	0.1	0	0.15	0.1	0.25	0.364075	Basalt
3334	9900	126.039	-14.3307	0	0	0	0.1	0	0.15	0.1	0.25	0.364243	Basalt
4550	13500	126.032	-14.0272	0	0	0	0	0	0	0	0	0.36453	Basalt
4856	3600	126.14	-14.0311	0.1	0.25	0.15	0.1	0	-0.1	0.2	0.25	0.364868	Laterite
3065	1800	125.221	-14.298	0	0	0	0	0	0	0	0	0.365043	Laterite
2193	291600	126.033	-14.7019	0.1	1	0.9	0.6	0	-0.6	0.6	1	0.365146	Sandstone
4855	4500	126.179	-14.0309	0	0.5	0.5	0.1	0	-0.1	0.1	0.5	0.365537	Laterite
3807	11700	126.411	-14.2722	0.3	0.25	-0.05	0.2	0	0.05	0.5	0.5	0.365561	Sandstone
1521	14340	125.347	-14.6638	0	0.5	0.5	0.1	0	-0.1	0.1	0.5	0.366105	Sandstone
907	9900	125.381	-14.994	0	0.25	0.25	0.2	0	0.05	0.2	0.5	0.36633	Sandstone
509	2700	125.061	-15.0617	0	0.25	0.25	0.3	0	-0.3	0.3	0.25	0.366479	Basalt
2763	1800	126.081	-14.5169	0	0.5	0.5	0.3	0	-0.3	0.3	0.5	0.366504	Sandstone
2975	4500	126.266	-14.415	0	0.25	0.25	0.6	0	-0.6	0.6	0.25	0.366907	Sandstone
4470	24300	126.097	-14.0459	0	0	0	0	0	0	0	0	0.36698	Basalt
2759	900	126.102	-14.528	0.2	0.25	0.05	0.3	0	-0.05	0.5	0.5	0.367991	Sandstone
487	1800	125.058	-15.0693	0	0.25	0.25	0.3	0	-0.3	0.3	0.25	0.3688	Basalt
2116	900	126.005	-14.6881	0.1	0.25	0.15	0.2	0	-0.2	0.3	0.25	0.368898	Sandstone
4058	900	126.492	-14.2379	0.2	0.5	0.3	0.3	0	0.2	0.5	1	0.369079	Basalt
1892	900	125.865	-14.6394	0.2	0.25	0.05	0.3	0	-0.3	0.5	0.25	0.369246	Basalt
3502	5400	126.149	-14.2919	0.1	0.25	0.15	0.2	0	-0.2	0.3	0.25	0.369278	Sandstone
1719	18000	125.829	-14.6942	0.3	0.75	0.45	0.3	0	-0.05	0.5	0.75	0.36936	Basalt
4509	11700	126.037	-14.0387	0	0	0	0	0	0	0	0	0.369508	Basalt
3928	27000	125.73	-14.1762	0	0	0	0	0	0	0	0	0.370203	Basalt
2960	2700	126.033	-14.387	0	0	0	0.1	0	-0.1	0.1	0	0.37043	Sandstone
2789	22500	126.156	-14.5457	0.2	0.5	0.3	0.5	0	-0.5	0.6	0.5	0.370453	Basalt
833	1800	125.274	-14.9547	0	0	0	0.1	0	0.15	0.1	0.25	0.370471	Basalt
835	21600	125.277	-14.9535	0	0	0	0.1	0	0.15	0.1	0.25	0.370704	Basalt
1288	900	125.867	-14.7483	0.3	0.75	0.45	0.4	0	-0.15	0.7	1	0.371009	Basalt
691	162000	125.369	-15.0672	0	0	0	0	0	0.25	0	0.25	0.371638	Sandstone
194	900	125.237	-15.1963	0.1	0	-0.1	0.1	0	0.15	0.2	0.25	0.371678	Sandstone
968	7200	125.403	-14.9416	0	0.25	0.25	0.2	0	-0.2	0.2	0.25	0.371915	Sandstone
4522	3600	126.044	-14.0336	0	0.25	0.25	0	0	0	0	0.25	0.37209	Basalt
4738	900	126.135	-14.0817	0	0	0	0.1	0	-0.1	0.1	0	0.372332	Basalt
2160	9000	125.898	-14.6329	0.2	0	-0.2	0.3	0	-0.05	0.5	0.25	0.372555	Basalt
3576	2700	126.391	-14.3205	0.3	0.5	0.2	0.3	0	-0.3	0.6	0.5	0.372561	Laterite
749	1800	125.402	-15.0024	0	0	0	0.2	0	0.05	0.2	0.25	0.372685	Sandstone
1240	1800	125.748	-14.7654	0.4	0.25	-0.15	0.2	0	0.3	0.6	0.75	0.372793	Basalt
4045	5400	126.167	-14.1194	0.1	0	-0.1	0.3	0	-0.3	0.4	0	0.372889	Basalt
1032	2700	125.524	-14.9254	0.2	0	-0.2	0.4	0	-0.15	0.5	0.25	0.372889	Sandstone
1165	10800	125.579	-14.7987	0	0.5	0.5	0.3	0	-0.3	0.3	0.5	0.373262	Sandstone
3353	2700	126.039	-14.323	0	0	0	0.1	0	0.15	0.1	0.25	0.373264	Basalt
4301	77400	126.135	-14.1012	0.1	0	-0.1	0.1	0	-0.1	0.2	0	0.373821	Basalt
4825	2700	126.155	-14.0434	0.1	0.5	0.4	0	0	0	0.1	0.5	0.374003	Laterite
4183	900	126.55	-14.2	0	0.5	0.5	0.3	0	-0.3	0.3	0.5	0.374245	Sandstone
2974	2700	126.264	-14.4149	0	0.5	0.5	0.6	0	-0.6	0.6	0.5	0.374462	Sandstone
2583	900	125.949	-14.5476	0	0	0	0	0	0	0	0	0.374806	Sandstone
3396	900	126.023	-14.3107	0	0	0	0.1	0	0.15	0.1	0.25	0.375062	Basalt
5000	3600	126.059	-13.9914	0	0	0	0	0	0	0	0	0.37528	Laterite
3362	900	126.038	-14.3214	0	0	0	0.1	0	0.15	0.1	0.25	0.375903	Basalt
85	43200	124.999	-15.1881	0	0	0	0.2	0	-0.2	0.2	0	0.375978	Basalt
1189	3600	125.639	-14.8498	0.1	0.25	0.15	0.6	0	-0.35	0.7	0.5	0.376146	Sandstone
1768	900	125.885	-14.6855	0.2	0	-0.2	0.3	0	-0.3	0.5	0	0.376527	Basalt
1205	1800	125.641	-14.8093	0.1	0.25	0.15	0.4	0	-0.15	0.4	0.5	0.376666	Sandstone
3443	20700	126.07	-14.2473	0	0.25	0.25	0.3	0	-0.3	0.3	0.25	0.377157	Sandstone
3560	27900	126.362	-14.3357	0.1	0.5	0.4	0.4	0	-0.4	0.5	0.5	0.37726	Sandstone
592	2700	125.137	-15.1038	0	0	0	0.3	0	-0.3	0.3	0	0.377472	Sandstone
2988	21600	126.297	-14.4168	0.1	0.25	0.15	0.4	0	-0.4	0.4	0.25	0.377829	Sandstone
756	61200	125.035	-14.9967	0	0.25	0.25	0.2	0	-0.2	0.2	0.25	0.378539	Sandstone
4375	5400	126.121	-14.0681	0.1	0	-0.1	0.1	0	-0.1	0.2	0	0.378597	Laterite
3430	900	126.115	-14.2621	0	0.25	0.25	0.3	0	-0.3	0.3	0.25	0.379147	Sandstone
3460	900	126.143	-14.3495	0.1	0.25	0.15	0.3	0	-0.05	0.4	0.5	0.379171	Sandstone
3778	11700	126.479	-14.278	0.2	0.5	0.3	0.3	0	-0.3	0.5	0.5	0.379551	Laterite
4523	66600	126.106	-14.03	0	0.25	0.25	0	0	0	0	0.25	0.381309	Basalt
953	21600	125.389	-14.9557	0	0.25	0.25	0.1	0	-0.1	0.1	0.25	0.38199	Coastal
4911	84600	126.211	-14.0253	0	0.25	0.25	0.1	0	-0.1	0.1	0.25	0.38256	Basalt
4675	232200	126.152	-14.1094	0.1	0.25	0.15	0.2	0	-0.2	0.3	0.25	0.38265	Basalt
3086	3600	125.3	-14.2883	0	0	0	0	0	0	0	0	0.383454	Basalt
3841	900	126.48	-14.2527	0.2	0.5	0.3	0.3	0	-0.05	0.5	0.75	0.38349	Basalt
1604	1800	125.716	-14.6401	0.2	0.5	0.3	0.1	0	-0.1	0.3	0.5	0.383545	Sandstone
1766	5400	125.878	-14.6862	0.2	0.25	0.05	0.2	0	-0.2	0.4	0.25	0.383628	Basalt
2953	1800	126.04	-14.3888	0	0	0	0.2	0	-0.2	0.2	0	0.383939	Sandstone
2406	14400	125.823	-14.6163	0.3	0.5	0.2	0.4	0	-0.15	0.7	0.75	0.384722	Basalt
1559	900	125.46	-14.6568	0	0.25	0.25	0.2	0	-0.2	0.2	0.25	0.38476	Sandstone
1496	1800	125.304	-14.6968	0.1	0.25	0.15	0.1	0	0.15	0.2	0.5	0.385495	Basalt
1249	20700	125.638	-14.7608	0.1	0.25	0.15	0.2	0	0.05	0.2	0.5	0.385739	Sandstone
3405	3600	126.019	-14.3055	0	0	0	0.1	0	0.15	0.1	0.25	0.386643	Basalt
642	45900	125.183	-15.0791	0	0.25	0.25	0	0	0	0	0.25	0.387075	Basalt
3835	4500	126.467	-14.2551	0.2	0.5	0.3	0.3	0	-0.05	0.5	0.75	0.387103	Laterite
692	33300	125.373	-15.0594	0	0	0	0	0	0.25	0	0.25	0.387227	Sandstone
3627	900	126.501	-14.3613	0.2	0.5	0.3	0.4	0	-0.4	0.6	0.5	0.388764	Basalt
1199	4500	125.7	-14.8205	0.1	0.25	0.15	0.4	1	0.35	0.5	1	0.390278	Sandstone
3706	900	126.497	-14.3064	0.2	0.25	0.05	0.4	0	-0.4	0.6	0.25	0.390444	Basalt
2529	900	125.826	-14.5286	0.2	0.5	0.3	0.3	0	-0.05	0.5	0.75	0.390808	Basalt
3103	900	125.298	-14.2744	0	0	0	0	0	0	0	0	0.39127	Laterite
3120	900	125.64	-14.3524	0.1	0.5	0.4	0	0	0	0.1	0.5	0.391675	Sandstone
2920	900	126.039	-14.4292	0	0	0	0.2	0	0.05	0.2	0.25	0.391716	Sandstone
1959	7200	125.785	-14.6331	0.4	0.25	-0.15	0.2	0	0.05	0.6	0.5	0.391724	Laterite
177	3600	125.009	-15.1707	0	0	0	0.2	0	-0.2	0.2	0	0.392456	Basalt
1246	9000	125.735	-14.76	0.3	0.5	0.2	0.1	0	0.4	0.4	1	0.392561	Basalt
4366	900	126.117	-14.07	0.1	0	-0.1	0.1	0	-0.1	0.2	0	0.392745	Basalt
2317	900	125.115	-14.6269	0.1	0	-0.1	0	0	0.25	0.1	0.25	0.393056	Sandstone
2097	5400	126.011	-14.6948	0.1	0.75	0.65	0.2	0	-0.2	0.3	0.75	0.393559	Sandstone
237	14400	125.25	-15.1372	0.1	0	-0.1	0.1	0	0.15	0.2	0.25	0.393567	Basalt
2502	2700	125.824	-14.5539	0.2	0.25	0.05	0.2	0	0.05	0.4	0.5	0.394351	Basalt
3175	12600	125.99	-14.3297	0	0	0	0	0	0	0	0	0.394472	Basalt
2995	2700	126.318	-14.3971	0	0.25	0.25	0.3	0	-0.3	0.3	0.25	0.394668	Sandstone
4595	12600	126.11	-14.0128	0	0	0	0	0	0	0	0	0.395297	Basalt
4558	321300	126.099	-14.0276	0	0.25	0.25	0	0	0	0	0.25	0.395338	Laterite
2148	3600	125.893	-14.6414	0.2	0	-0.2	0.3	0	-0.3	0.5	0	0.395384	Basalt
446	5400	125.114	-15.0902	0	0	0	0.3	0	-0.05	0.3	0.25	0.395801	Sandstone
2013	51300	125.844	-14.6255	0.2	0.25	0.05	0.3	0	-0.05	0.4	0.5	0.39591	Basalt
147	2700	125.082	-15.1464	0	0	0	0.3	0	-0.3	0.3	0	0.396206	Basalt
2346	6300	125.259	-14.6177	0	0.25	0.25	0.1	0	-0.1	0.1	0.25	0.396958	Sandstone
3433	11700	126.083	-14.2544	0	0.25	0.25	0.3	0	-0.3	0.3	0.25	0.39798	Basalt
351	3600	125.037	-15.1125	0	0.25	0.25	0.3	0	-0.3	0.3	0.25	0.398064	Basalt
1548	1800	125.455	-14.6687	0	0	0	0.4	0	-0.4	0.4	0	0.39821	Sandstone
1325	11700	126.009	-14.8161	0.2	0.75	0.55	0.3	0	-0.3	0.4	0.75	0.398433	Sandstone
2719	900	126.115	-14.5558	0.1	0.5	0.4	0.3	0	-0.05	0.4	0.75	0.398454	Sandstone
121	1800	125.026	-15.1633	0	0	0	0.2	0	-0.2	0.2	0	0.398542	Coastal
1605	1800	125.718	-14.6401	0.2	0.5	0.3	0.1	0	-0.1	0.3	0.5	0.398613	Sandstone
4783	33300	126.158	-14.0586	0	0	0	0.1	0	-0.1	0.1	0	0.398766	Basalt
902	12600	125.379	-14.8795	0.1	0.25	0.15	0.4	0	-0.15	0.5	0.5	0.398987	Basalt
2232	8100	126.03	-14.6603	0	0.25	0.25	0.3	0	-0.05	0.3	0.5	0.399191	Sandstone
4761	4500	126.17	-14.0723	0	0.25	0.25	0	0	0	0	0.25	0.399284	Basalt
5153	5400	126.019	-13.936	0	0	0	0.1	0	-0.1	0.1	0	0.399354	Basalt
958	1800	125.386	-14.953	0	0.25	0.25	0.1	0	-0.1	0.1	0.25	0.399638	Sandstone
3547	2700	126.346	-14.3497	0	0	0	0.4	0	-0.4	0.4	0	0.399767	Sandstone
1233	900	125.644	-14.7729	0.1	0	-0.1	0.1	0	-0.1	0.2	0	0.399862	Sandstone
4434	900	126.054	-14.054	0	0	0	0	0	0	0	0	0.399897	Basalt
4752	5400	126.158	-14.0755	0	0	0	0.1	0	-0.1	0.1	0	0.401039	Basalt
1031	5400	125.523	-14.9256	0.2	0	-0.2	0.4	0	-0.15	0.5	0.25	0.401361	Sandstone
5175	900	126.017	-13.9279	0	0	0	0	0	0	0	0	0.402623	Laterite
2319	3600	125.207	-14.6069	0	0.25	0.25	0	0	0.25	0	0.5	0.402701	Sandstone
3485	4500	126.158	-14.3025	0.1	0.5	0.4	0.4	0	-0.4	0.5	0.5	0.402973	Sandstone
608	3600	125.175	-15.0925	0	0	0	0	0	0	0	0	0.403006	Sandstone
2791	9900	126.223	-14.5388	0	0.5	0.5	0.7	0	-0.7	0.7	0.5	0.403117	Sandstone
4217	22500	125.994	-14.0613	0	0.25	0.25	0	0	0	0	0.25	0.403568	Basalt
1435	900	126.093	-14.7422	0.1	0.75	0.65	0.6	0	-0.6	0.7	0.75	0.403745	Sandstone
1428	900	126.095	-14.7492	0.1	0.75	0.65	0.7	0	-0.7	0.8	0.75	0.403953	Sandstone
897	1800	125.377	-14.8806	0.1	0.25	0.15	0.4	0	-0.15	0.5	0.5	0.404243	Basalt
2130	17100	125.915	-14.6815	0.3	0	-0.3	0.1	0	0.15	0.4	0.25	0.404815	Basalt
3578	4500	126.358	-14.318	0	0.25	0.25	0.3	0	-0.05	0.3	0.5	0.40531	Sandstone
538	900	125.054	-15.0449	0	0.25	0.25	0.3	0	-0.3	0.3	0.25	0.405362	Basalt
73	1800	125.03	-15.2046	0	0.25	0.25	0.2	0	-0.2	0.2	0.25	0.405736	Basalt
4187	4500	126.549	-14.1971	0.1	0.5	0.4	0.3	0	-0.3	0.4	0.5	0.405914	Sandstone
1027	8100	125.518	-14.9338	0.1	0	-0.1	0.4	0	-0.4	0.4	0	0.406084	Sandstone
2848	1800	125.821	-14.483	0.1	0.25	0.15	0.1	0	-0.1	0.2	0.25	0.406182	Basalt
1830	6300	125.867	-14.6512	0.2	0	-0.2	0.3	0	-0.3	0.5	0	0.406344	Basalt
3135	2700	126.006	-14.3424	0	0	0	0.1	0	-0.1	0.1	0	0.406684	Basalt
404	2700	125.038	-15.1029	0	0.25	0.25	0.3	0	-0.3	0.3	0.25	0.406818	Basalt
4383	1800	126.13	-14.0662	0	0.25	0.25	0.1	0	-0.1	0.1	0.25	0.406924	Basalt
2524	21600	125.832	-14.5352	0.2	0.5	0.3	0.3	0	-0.05	0.5	0.75	0.407521	Basalt
1752	900	125.82	-14.689	0.3	0.75	0.45	0.2	0	-0.2	0.5	0.75	0.407605	Basalt
4402	1800	126.015	-14.0618	0	0	0	0	0	0	0	0	0.407847	Basalt
2790	900	126.156	0	0.2	0.5	0.3	0.5	0	-0.5	0.6	0.5	0.408137	Basalt
5138	155700	126.052	-13.9471	0	0	0	0.1	0	-0.1	0.1	0	0.408438	Laterite
4629	900	126.094	-13.9958	0	0	0	0	0	0	0	0	0.40885	Basalt
1124	28800	125.297	-14.845	0	0.5	0.5	0.2	0	0.05	0.2	0.75	0.409177	Sandstone
4167	3600	126.528	-14.2308	0.2	0.5	0.3	0.4	0	-0.4	0.6	0.5	0.409213	Basalt
1117	18900	125.335	-14.8676	0	0.5	0.5	0.3	0	-0.05	0.3	0.75	0.409576	Sandstone
2294	24300	126.038	-14.6186	0	0.25	0.25	0.3	0	-0.05	0.3	0.5	0.409946	Sandstone
3416	46800	126.071	-14.2751	0.1	0.25	0.15	0.3	0	-0.3	0.4	0.25	0.410197	Sandstone
2520	7200	125.836	-14.5391	0.2	0.5	0.3	0.3	0	-0.05	0.5	0.75	0.410357	Basalt
1931	900	125.817	-14.6351	0.3	0.5	0.2	0.4	0	-0.15	0.6	0.75	0.410494	Basalt
4134	14400	126.427	-14.1958	0.1	0.25	0.15	0.4	0	-0.15	0.5	0.5	0.410642	Sandstone
2037	3600	125.823	-14.6209	0.3	0.5	0.2	0.4	0	-0.15	0.7	0.75	0.410889	Laterite
1785	900	125.825	-14.6746	0.5	0.5	0	0.3	0	-0.05	0.6	0.75	0.411476	Basalt
1781	2700	125.823	-14.6761	0.2	0.5	0.3	0.3	0	-0.05	0.5	0.75	0.412212	Basalt
2515	1800	125.819	-14.5414	0.2	0.5	0.3	0.3	0	0.2	0.5	0.75	0.412226	Basalt
3929	54900	125.681	-14.1704	0	0	0	0	0	0	0	0	0.412835	Laterite
5130	2700	126.055	-13.9443	0	0	0	0.1	0	-0.1	0.1	0	0.413199	Laterite
4238	165600	126.002	-14.047	0	0	0	0	0	0	0	0	0.413435	Basalt
903	9900	125.317	-14.9659	0.1	0.25	0.15	0.1	0	0.15	0.2	0.5	0.41372	Sandstone
2347	10800	125.249	-14.6167	0	0	0	0.1	0	-0.1	0.1	0	0.414306	Sandstone
2959	18900	126.036	-14.3882	0	0	0	0.1	0	-0.1	0.1	0	0.414378	Sandstone
2154	1800	125.888	-14.6375	0.2	0	-0.2	0.3	0	-0.3	0.5	0	0.414883	Basalt
4159	900	126.42	-14.1455	0.3	0.25	-0.05	0.3	0	-0.3	0.6	0.25	0.415126	Sandstone
4298	3600	125.982	-14.0029	0	0.25	0.25	0	0	0	0	0.25	0.41514	Basalt
3026	900	126.501	-14.4312	0	0.25	0.25	0.4	0	-0.4	0.4	0.25	0.415735	Sandstone
3197	900	126.003	-14.3213	0	0	0	0.1	0	0.15	0.1	0.25	0.415836	Basalt
391	1800	125.088	-15.1049	0	0.25	0.25	0.3	0	-0.05	0.3	0.5	0.41585	Basalt
996	9000	125.446	-14.9241	0	0	0	0.4	0	-0.4	0.4	0	0.416984	Basalt
2944	7200	126.036	-14.3933	0	0	0	0.1	0	-0.1	0.1	0	0.417007	Sandstone
1972	2700	125.785	-14.6316	0.4	0.25	-0.15	0.2	0	0.05	0.6	0.5	0.417095	Laterite
1506	7200	125.278	-14.6866	0.1	0.25	0.15	0	0	0.25	0.1	0.5	0.417139	Basalt
195	1800	125.171	-15.1961	0.2	0.5	0.3	0.2	0	-0.2	0.4	0.5	0.417459	Sandstone
457	900	125.078	-15.0878	0	0.25	0.25	0.3	0	-0.3	0.3	0.25	0.417778	Basalt
4448	9000	126.045	-14.0515	0	0	0	0	0	0	0	0	0.418651	Laterite
4415	900	126.041	-14.0588	0	0.25	0.25	0	0	0	0	0.25	0.418916	Laterite
3358	3600	126.04	-14.3222	0	0	0	0.2	0	0.05	0.2	0.25	0.41919	Basalt
1747	4500	125.884	-14.6887	0.2	0	-0.2	0.3	0	-0.3	0.5	0	0.41924	Basalt
1391	2700	125.917	-14.7496	0.4	0.5	0.1	0.4	0	0.1	0.7	0.75	0.419382	Basalt
2812	5400	125.265	-14.4231	0	0	0	0	0	0	0	0	0.419475	Sandstone
1471	4500	125.143	-14.6538	0	0	0	0	0	0	0	0	0.420053	Sandstone
585	7200	125.202	-15.1117	0	0.25	0.25	0	0	0	0	0.25	0.420982	Sandstone
4687	8100	126.207	-14.1046	0	0.25	0.25	0.2	0	-0.2	0.2	0.25	0.421331	Basalt
719	18000	125.394	-15.0631	0	0	0	0.1	0	0.15	0.1	0.25	0.421388	Sandstone
452	900	125.066	-15.089	0	0.25	0.25	0.3	0	-0.3	0.3	0.25	0.421617	Basalt
3257	1800	126.097	-14.3646	0	0.25	0.25	0.3	0	-0.3	0.3	0.25	0.421662	Sandstone
209	900	125.25	-15.1715	0.1	0.25	0.15	0.3	0	-0.3	0.4	0.25	0.421666	Sandstone
4610	1800	126.064	-14.0054	0	0	0	0	0	0	0	0	0.421842	Basalt
1876	6300	125.834	-14.6439	0.3	0.25	-0.05	0.2	0	0.05	0.5	0.5	0.42201	Basalt
1906	18900	125.868	-14.6377	0.2	0	-0.2	0.3	0	-0.3	0.5	0	0.422039	Basalt
2226	15300	126.029	-14.6712	0	0.5	0.5	0.5	0	-0.5	0.5	0.5	0.422329	Sandstone
3500	900	126.151	-14.2917	0.1	0.25	0.15	0.2	0	-0.2	0.3	0.25	0.422884	Sandstone
2570	3600	126.01	-14.6163	0	0	0	0.3	0	-0.05	0.3	0.25	0.423263	Sandstone
3990	18900	126.194	-14.1833	0	0.25	0.25	0.4	0	-0.4	0.4	0.25	0.423464	Sandstone
2421	1800	125.832	-14.6151	0.2	0.5	0.3	0.4	0	-0.15	0.6	0.75	0.423474	Basalt
3942	18900	125.703	-14.132	0	0	0	0	0	0	0	0	0.424773	Basalt
1718	900	125.819	-14.695	0.4	0.75	0.35	0.2	0	-0.2	0.5	0.75	0.425182	Basalt
453	16200	125.088	-15.089	0	0.25	0.25	0.3	0	-0.3	0.3	0.25	0.425244	Basalt
1176	4500	125.561	-14.7774	0.1	0.5	0.4	0.3	0	-0.05	0.3	0.75	0.425819	Sandstone
5151	900	126.109	-13.9371	0	0	0	0	0	0	0	0	0.425902	Basalt
1646	2700	125.86	-14.7215	0.3	0.25	-0.05	0.3	0	-0.05	0.5	0.5	0.426394	Basalt
1912	2700	125.83	-14.6373	0.3	0.5	0.2	0.2	0	0.05	0.5	0.75	0.426532	Basalt
2634	10800	126.087	-14.6008	0.1	0.25	0.15	0.5	0	-0.25	0.5	0.5	0.426643	Sandstone
3030	34200	126.491	-14.4165	0	0.75	0.75	0.4	0	-0.4	0.4	0.75	0.426804	Sandstone
2367	900	125.709	-14.6199	0.3	0.5	0.2	0.2	0	0.05	0.5	0.75	0.426975	Sandstone
2688	16200	126.122	-14.572	0.1	0.75	0.65	0.5	0	-0.25	0.6	0.75	0.427724	Sandstone
4005	900	126.162	-14.1415	0.1	0.25	0.15	0.3	0	-0.3	0.4	0.25	0.428079	Laterite
2902	900	125.98	-14.3825	0	0	0	0	0	0	0	0	0.42831	Basalt
5110	59400	126.108	-13.9519	0	0.25	0.25	0.1	0	-0.1	0.1	0.25	0.428535	Laterite
4841	10800	126.135	-14.0349	0.1	0.25	0.15	0.1	0	-0.1	0.2	0.25	0.428645	Laterite
1934	900	125.842	-14.6346	0.3	0.25	-0.05	0.2	0	0.05	0.5	0.5	0.428923	Basalt
1652	1800	125.86	-14.7201	0.3	0.25	-0.05	0.3	0	-0.05	0.5	0.5	0.428937	Basalt
2191	10800	126.106	-14.7185	0.1	0.25	0.15	0.5	0	-0.5	0.6	0.25	0.429445	Sandstone
451	7200	125.041	-15.09	0	0.25	0.25	0.3	0	-0.3	0.3	0.25	0.429518	Basalt
361	900	125.013	-15.1109	0	0.25	0.25	0.2	0	-0.2	0.2	0.25	0.429632	Basalt
612	1800	125.232	-15.0896	0	0	0	0	0	0	0	0	0.42974	Sandstone
1966	900	125.873	-14.6315	0.2	0.25	0.05	0.3	0	-0.3	0.5	0.25	0.43006	Basalt
4886	900	126.161	-14.0258	0.1	0.5	0.4	0.1	0	-0.1	0.2	0.5	0.430199	Laterite
1820	433800	125.87	-14.6566	0.3	0	-0.3	0.3	0	-0.3	0.6	0	0.430632	Basalt
2550	900	125.788	-14.519	0.3	0.5	0.2	0.3	0	0.2	0.6	0.75	0.431351	Basalt
990	1800	125.477	-14.9252	0	0.5	0.5	0.4	0	-0.4	0.4	0.5	0.431601	Sandstone
2535	1800	125.783	-14.5264	0.3	0.5	0.2	0.3	0	0.2	0.6	0.75	0.431727	Basalt
5185	900	126.03	-13.9234	0	0	0	0	0	0	0	0	0.431813	Laterite
4650	1800	126.199	-14.1107	0.1	0	-0.1	0.2	0	-0.2	0.3	0	0.432092	Basalt
2519	184500	125.844	-14.5396	0.2	0.25	0.05	0.3	0	-0.05	0.5	0.5	0.432096	Basalt
1860	1800	125.833	-14.6471	0.3	0.25	-0.05	0.2	0	0.05	0.5	0.5	0.432314	Basalt
4762	3600	126.17	-14.0711	0	0.25	0.25	0	0	0	0	0.25	0.432451	Basalt
35	900	125.087	-15.2224	0.1	0.75	0.65	0.2	0	0.05	0.3	1	0.432709	Basalt
524	4500	125.119	-15.0538	0	0	0	0.2	0	-0.2	0.2	0	0.432732	Basalt
5079	9900	126.124	-13.9578	0	0.25	0.25	0	0	0	0	0.25	0.433159	Laterite
416	900	125.012	-15.0984	0	0	0	0.2	0	-0.2	0.2	0	0.433255	Basalt
1573	900	125.533	-14.7195	0	0.5	0.5	0.3	0	-0.05	0.3	0.75	0.433259	Sandstone
644	90000	125.188	-15.0742	0	0.25	0.25	0	0	0	0	0.25	0.433587	Basalt
4094	900	126.46	-14.227	0.2	0.5	0.3	0.3	0	-0.05	0.5	0.75	0.433797	Basalt
971	1800	125.407	-14.9411	0	0.25	0.25	0.2	0	-0.2	0.2	0.25	0.43381	Sandstone
2153	4500	125.895	-14.6378	0.2	0	-0.2	0.3	0	-0.3	0.5	0	0.433866	Basalt
3102	3600	125.31	-14.2748	0	0	0	0	0	0	0	0	0.433896	Basalt
2275	21600	126.053	-14.626	0	0.25	0.25	0.4	0	-0.15	0.4	0.5	0.434306	Sandstone
4916	22500	126.179	-14.0232	0	0.25	0.25	0.1	0	-0.1	0.1	0.25	0.435811	Basalt
2082	2700	125.909	-14.7035	0.3	0.25	-0.05	0.2	0	0.05	0.5	0.5	0.435845	Basalt
1852	6300	125.771	-14.649	0.4	0.25	-0.15	0.2	0	0.05	0.6	0.5	0.435982	Basalt
2424	900	125.863	-14.6143	0.2	0	-0.2	0.3	0	-0.3	0.5	0	0.436034	Basalt
4155	9000	126.473	-14.1638	0.1	0.5	0.4	0.2	0	-0.2	0.3	0.5	0.43683	Sandstone
2505	900	125.827	-14.5524	0.2	0	-0.2	0.1	0	-0.1	0.3	0	0.437875	Basalt
4649	25200	126.206	-14.1127	0	0	0	0.3	0	-0.3	0.3	0	0.438584	Basalt
1760	3600	125.878	-14.6874	0.2	0.25	0.05	0.2	0	-0.2	0.4	0.25	0.438713	Basalt
2545	1800	125.809	-14.5219	0.2	0.5	0.3	0.2	0	0.05	0.4	0.75	0.439114	Basalt
546	900	125.053	-15.0313	0	0.25	0.25	0.3	0	-0.3	0.3	0.25	0.439226	Basalt
1347	1800	125.937	-14.7892	0.2	0.5	0.3	0.4	0	-0.15	0.6	0.75	0.43978	Basalt
379	3600	125.056	-15.1078	0	0.25	0.25	0.3	0	-0.3	0.3	0.25	0.439861	Basalt
1515	6300	125.37	-14.6696	0	0.25	0.25	0.3	0	-0.05	0.3	0.5	0.440419	Sandstone
1806	18000	125.823	-14.6635	0.4	0.25	-0.15	0.1	0	-0.1	0.5	0.25	0.440442	Basalt
628	11700	125.212	-15.0855	0	0.25	0.25	0	0	0	0	0.25	0.440533	Sandstone
2912	6300	126.031	-14.4367	0	0	0	0.1	0	-0.1	0.1	0	0.440621	Sandstone
4409	389700	126.109	-14.063	0.1	0	-0.1	0.1	0	-0.1	0.2	0	0.441144	Laterite
4596	1800	126.105	-14.0121	0	0	0	0	0	0	0	0	0.441807	Laterite
1994	900	125.851	-14.6271	0.2	0.25	0.05	0.3	0	-0.3	0.4	0.25	0.442258	Basalt
941	5400	125.429	-14.9653	0	0	0	0.2	0	-0.2	0.2	0	0.443057	Sandstone
2718	900	126.118	-14.556	0.1	0.5	0.4	0.3	0	-0.05	0.4	0.75	0.44347	Sandstone
2749	30600	126.067	-14.5367	0	0.75	0.75	0.7	0	-0.45	0.7	1	0.443559	Sandstone
4286	5400	125.988	-14.0113	0	0	0	0	0	0	0	0	0.44401	Basalt
3273	5400	126.095	-14.358	0	0.25	0.25	0.3	0	-0.05	0.3	0.25	0.444063	Sandstone
2246	8100	126.035	-14.6499	0	0.25	0.25	0.3	0	-0.05	0.3	0.5	0.444877	Sandstone
3397	5400	126.016	-14.3107	0	0	0	0.1	0	0.15	0.1	0.25	0.445124	Basalt
2680	12600	126.136	-14.5749	0.1	0.25	0.15	0.5	0	-0.25	0.6	0.5	0.445319	Basalt
2893	72000	126.007	-14.4073	0	0.25	0.25	0.1	0	-0.1	0.1	0.25	0.445901	Basalt
819	1800	125.36	-14.971	0	0.25	0.25	0.3	0	-0.05	0.3	0.5	0.445957	Sandstone
1890	43200	125.835	-14.6418	0.3	0.25	-0.05	0.2	0	0.05	0.5	0.5	0.446491	Basalt
4530	6300	126.117	-14.0314	0	0	0	0	0	0	0	0	0.446581	Basalt
372	1800	125.087	-15.1083	0	0.25	0.25	0.3	0	-0.05	0.3	0.5	0.446931	Basalt
1977	14400	125.825	-14.6306	0.2	0.5	0.3	0.4	0	-0.15	0.6	0.75	0.446943	Basalt
942	3600	125.382	-14.9647	0	0.25	0.25	0.2	0	-0.2	0.2	0.25	0.447873	Sandstone
4947	54000	126.172	-14.014	0	0.25	0.25	0.1	0	-0.1	0.1	0.25	0.448187	Basalt
900	1800	125.364	-14.8798	0.1	0.25	0.15	0.3	0	-0.05	0.4	0.5	0.448234	Sandstone
738	5400	125.403	-15.0171	0.1	0	-0.1	0.1	0	0.15	0.2	0.25	0.448443	Sandstone
2104	2700	125.91	-14.6932	0.3	0.25	-0.05	0.2	0	0.05	0.5	0.5	0.448569	Basalt
2473	900	125.795	-14.5883	0.5	0.25	-0.25	0.4	0	-0.15	0.8	0.5	0.448981	Basalt
3296	900	126.088	-14.3446	0.1	0	-0.1	0.3	0	-0.05	0.4	0.25	0.449389	Sandstone
2358	900	125.46	-14.5918	0.1	0.25	0.15	0	0	0	0.1	0.25	0.449517	Sandstone
1044	1800	125.669	-14.8949	0.1	0.25	0.15	0.5	0	-0.25	0.6	0.5	0.44968	Basalt
1743	6300	125.824	-14.6906	0.4	0.5	0.1	0.2	0	-0.2	0.5	0.5	0.449712	Basalt
3934	18900	125.676	-14.1644	0	0	0	0	0	0	0	0	0.450061	Basalt
2804	3600	126.508	-14.4895	0	0.5	0.5	0.4	0	-0.4	0.4	0.5	0.450891	Sandstone
3381	18000	126.033	-14.315	0	0	0	0.2	0	0.05	0.2	0.25	0.450908	Basalt
899	69300	125.359	-14.8813	0.1	0.5	0.4	0.3	0	-0.05	0.4	0.75	0.451097	Basalt
3212	3600	126.003	-14.3118	0	0	0	0.1	0	0.15	0.1	0.25	0.45118	Basalt
1510	9000	125.277	-14.6851	0	0.25	0.25	0	0	0.25	0	0.5	0.45159	Basalt
3697	9000	126.484	-14.3097	0.2	0.75	0.55	0.3	0	-0.3	0.5	0.75	0.452202	Basalt
3838	5400	126.449	-14.255	0.2	0.75	0.55	0.4	0	-0.15	0.6	1	0.452432	Basalt
4978	3600	126.105	-13.994	0.1	0.25	0.15	0	0	0	0.1	0.25	0.452573	Laterite
2714	900	126.121	-14.5573	0.1	0.5	0.4	0.4	0	-0.15	0.5	0.75	0.452791	Sandstone
3233	24300	125.999	-14.3016	0	0	0	0	0	0	0	0	0.453381	Basalt
393	1800	125.104	-15.1045	0	0	0	0.3	0	-0.05	0.3	0.25	0.453495	Basalt
4897	22500	126.208	-14.0255	0	0.25	0.25	0	0	0	0	0.25	0.454348	Basalt
4588	4500	126.096	-14.0151	0	0.25	0.25	0	0	0	0	0.25	0.454447	Basalt
1710	3600	125.879	-14.6974	0.2	0.5	0.3	0.3	0	-0.3	0.5	0.5	0.454697	Basalt
4381	6300	126.087	-14.0669	0	0	0	0	0	0	0	0	0.455627	Laterite
2567	39600	125.817	-14.4983	0.2	0.25	0.05	0.3	0	-0.05	0.5	0.5	0.455645	Basalt
2073	1800	125.904	-14.7076	0.3	0.25	-0.05	0.2	0	0.05	0.5	0.5	0.456742	Basalt
1917	5400	125.818	-14.6361	0.3	0.5	0.2	0.4	0	-0.15	0.6	0.75	0.456989	Basalt
1157	3600	125.407	-14.7516	0	0.75	0.75	0.5	0	-0.25	0.5	0.75	0.457221	Sandstone
3575	900	126.385	-14.3213	0.3	0.5	0.2	0.3	0	-0.3	0.6	0.5	0.457391	Basalt
3375	2700	126.037	-14.3173	0	0	0	0.1	0	-0.1	0.1	0	0.457408	Basalt
2578	9900	125.964	-14.557	0	0	0	0	0	0.25	0	0.25	0.457668	Sandstone
4660	28800	126.195	-14.1096	0.1	0	-0.1	0.2	0	-0.2	0.3	0	0.457668	Basalt
2521	3600	125.834	-14.5381	0.2	0.5	0.3	0.3	0	-0.05	0.5	0.75	0.45768	Basalt
806	7200	125.327	-14.9868	0.1	0.25	0.15	0.1	0	0.15	0.2	0.5	0.458248	Sandstone
4913	28800	126.195	-14.0234	0	0.25	0.25	0.1	0	-0.1	0.1	0.25	0.458911	Basalt
1265	28800	125.75	-14.7472	0.4	0.5	0.1	0.2	0	0.05	0.6	0.75	0.45892	Basalt
1230	9900	125.652	-14.7761	0.1	0.25	0.15	0.2	0	-0.2	0.3	0.25	0.459023	Sandstone
1366	900	125.922	-14.7644	0.4	0.25	-0.15	0.3	0	-0.05	0.7	0.5	0.459136	Basalt
3648	900	126.469	-14.349	0.1	0.5	0.4	0.3	0	-0.3	0.4	0.5	0.459322	Sandstone
3567	3600	126.348	-14.3287	0	0.25	0.25	0.4	0	-0.15	0.4	0.5	0.459711	Sandstone
5128	900	126.122	-13.9442	0	0	0	0.1	0	-0.1	0.1	0	0.46062	Basalt
214	1800	125.201	-15.1545	0.1	0	-0.1	0.2	0	0.05	0.3	0.25	0.460766	Sandstone
4630	6300	126.097	-13.9962	0	0.25	0.25	0	0	0	0	0.25	0.460899	Laterite
4788	900	126.152	-14.0544	0	0.5	0.5	0.1	0	-0.1	0.1	0.5	0.462446	Basalt
1221	900	125.684	-14.7871	0.2	0.25	0.05	0	0	0.25	0.2	0.5	0.462695	Sandstone
4518	4500	126.052	-14.0348	0	0.25	0.25	0	0	0	0	0.25	0.463084	Basalt
2717	62100	126.125	-14.5565	0.2	0.75	0.55	0.5	0	-0.25	0.6	0.75	0.463371	Sandstone
1304	2700	126.007	-14.8553	0.3	0.75	0.45	0.7	0	-0.7	0.7	0.75	0.463436	Sandstone
714	369900	125.376	-15.0051	0.1	0	-0.1	0.2	0	0.05	0.3	0.25	0.463663	Basalt
63	4500	125.013	-15.207	0	0	0	0.1	0	-0.1	0.1	0	0.463699	Basalt
411	60300	125.064	-15.1006	0	0.25	0.25	0.3	0	-0.3	0.3	0.25	0.463964	Basalt
1136	59400	125.298	-14.8379	0	0.5	0.5	0.3	0	-0.05	0.3	0.75	0.464413	Sandstone
4163	3600	126.543	-14.2335	0.2	0.75	0.55	0.3	0	-0.3	0.5	0.75	0.465237	Basalt
3545	3600	126.345	-14.3512	0	0	0	0.4	0	-0.4	0.4	0	0.465634	Sandstone
3959	1800	126.136	-14.2346	0	0.25	0.25	0.3	0	-0.3	0.3	0.25	0.466283	Basalt
4292	5400	125.99	-14.0066	0	0.25	0.25	0	0	0	0	0.25	0.466304	Basalt
3873	900	126.525	-14.2689	0.2	0.5	0.3	0.3	0	-0.05	0.5	0.75	0.466778	Basalt
424	14400	125.118	-15.0932	0	0	0	0.3	0	-0.05	0.3	0.25	0.468046	Sandstone
3037	1800	126.482	-14.4016	0.1	0.5	0.4	0.4	0	-0.4	0.5	0.5	0.468412	Sandstone
859	1800	125.257	-14.9279	0	0	0	0	0	0	0	0	0.468437	Sandstone
3742	6300	126.5	-14.2909	0.2	0.75	0.55	0.3	0	-0.3	0.5	0.75	0.468577	Basalt
908	2700	125.461	-14.9906	0	0	0	0.3	0	-0.3	0.3	0	0.468687	Sandstone
4818	5400	126.172	-14.0451	0.1	0.5	0.4	0.1	0	-0.1	0.2	0.5	0.468945	Laterite
1443	3600	126.191	-14.7603	0.1	0.25	0.15	0.6	0	-0.35	0.6	0.5	0.469326	Sandstone
2803	4500	126.434	-14.4909	0.1	0.75	0.65	0.7	0	-0.45	0.7	0.75	0.46966	Sandstone
4294	3600	125.983	-14.0053	0	0.25	0.25	0	0	0	0	0.25	0.47038	Basalt
3456	900	126.154	-14.3505	0.1	0	-0.1	0.4	0	-0.4	0.5	0	0.470765	Basalt
5281	1800	126.175	-13.939	0	0	0	0	0	0	0	0	0.471023	Basalt
2564	900	125.805	-14.4987	0.2	0.5	0.3	0.2	0	0.05	0.4	0.5	0.471088	Basalt
3364	495900	126.034	-14.3296	0	0	0	0.2	0	0.05	0.2	0.25	0.471945	Basalt
2987	6300	126.277	-14.4282	0	0.25	0.25	0.5	0	-0.5	0.5	0.25	0.47227	Sandstone
1658	8100	125.874	-14.7165	0.3	0.5	0.2	0.3	0	-0.05	0.5	0.75	0.472526	Basalt
1091	2700	125.18	-14.8655	0	0	0	0	0	0	0	0	0.473396	Sandstone
203	1800	125.211	-15.1836	0.1	0.25	0.15	0.3	0	-0.05	0.4	0.5	0.473501	Sandstone
945	3600	125.43	-14.9629	0	0	0	0.2	0	-0.2	0.2	0	0.473891	Sandstone
559	2700	125.066	-15.0197	0	0.25	0.25	0.3	0	-0.3	0.3	0.25	0.474068	Sandstone
4798	6300	126.16	-14.0488	0.1	0.5	0.4	0.1	0	-0.1	0.2	0.5	0.474228	Laterite
2979	1800	126.196	-14.369	0	0.75	0.75	0.4	0	-0.4	0.4	0.75	0.474278	Basalt
2182	13500	126.044	-14.7317	0	0.25	0.25	0.4	0	-0.4	0.4	0.25	0.474651	Sandstone
3049	1800	126.434	-14.3745	0.2	0.5	0.3	0.4	0	-0.4	0.6	0.5	0.475521	Basalt
1898	1800	125.848	-14.6386	0.3	0.25	-0.05	0.3	0	-0.3	0.5	0.25	0.475585	Basalt
1105	5400	125.249	-14.8034	0.1	0.5	0.4	0.3	0	-0.05	0.3	0.75	0.475993	Sandstone
3672	900	126.521	-14.3274	0.1	0.75	0.65	0.5	0	-0.25	0.6	1	0.476313	Basalt
4962	116100	126.142	-14.0065	0	0.25	0.25	0	0	0	0	0.25	0.476715	Basalt
1673	1800	125.828	-14.7076	0.2	0.5	0.3	0.4	0	-0.15	0.5	0.75	0.476997	Basalt
771	5400	125.247	-14.9429	0	0	0	0	0	0	0	0	0.477028	Sandstone
829	2700	125.309	-14.9583	0.1	0.25	0.15	0.1	0	0.15	0.2	0.5	0.477338	Sandstone
4834	48600	126.137	-14.0379	0.1	0.5	0.4	0.1	0	-0.1	0.2	0.5	0.477504	Laterite
443	900	125.065	-15.0909	0	0.25	0.25	0.3	0	-0.3	0.3	0.25	0.47763	Basalt
3528	1800	126.255	-14.2463	0	0.25	0.25	0.1	0	-0.1	0.1	0.25	0.477661	Sandstone
747	9900	125.441	-15.006	0	0	0	0.2	0	-0.2	0.2	0	0.477852	Sandstone
3131	900	125.639	-14.2505	0.1	0	-0.1	0.1	0	0.15	0.2	0.25	0.478278	Sandstone
2906	900	126.073	-14.4816	0	0.25	0.25	0.3	0	-0.3	0.3	0.25	0.479595	Sandstone
4987	5400	126.111	-13.9916	0.1	0.25	0.15	0	0	0	0.1	0.25	0.480068	Laterite
3452	1800	126.155	-14.3529	0.1	0.5	0.4	0.3	0	-0.3	0.4	0.5	0.48089	Sandstone
623	4500	125.227	-15.0862	0	0	0	0	0	0	0	0	0.481394	Sandstone
407	900	125.047	-15.1019	0	0.25	0.25	0.3	0	-0.3	0.3	0.25	0.481726	Basalt
3555	900	126.273	-14.3429	0	0.25	0.25	0.5	0	-0.5	0.5	0.25	0.481979	Sandstone
2845	1800	125.825	-14.4837	0.1	0.25	0.15	0.1	0	-0.1	0.2	0.25	0.482022	Basalt
3265	900	126.132	-14.3597	0	0	0	0.3	0	-0.05	0.3	0.25	0.482038	Sandstone
479	900	125.056	-15.0739	0	0.25	0.25	0.3	0	-0.3	0.3	0.25	0.482783	Basalt
2089	1800	125.895	-14.7002	0.3	0.5	0.2	0.3	0	-0.05	0.5	0.75	0.483105	Basalt
1417	8100	126.052	-14.7864	0	0.25	0.25	0.5	0	-0.5	0.5	0.25	0.483181	Sandstone
272	900	125.262	-15.1982	0	0.25	0.25	0.2	0	-0.2	0.2	0.25	0.483676	Sandstone
5027	4500	126.131	-13.9872	0.1	0	-0.1	0	0	0	0.1	0	0.483699	Basalt
4200	900	126.549	-14.1648	0.1	0.5	0.4	0.3	0	-0.3	0.4	0.5	0.48423	Sandstone
367	3600	125.009	-15.1095	0	0.25	0.25	0.3	0	-0.3	0.3	0.25	0.484298	Basalt
4008	8100	126.161	-14.1399	0.1	0.25	0.15	0.3	0	-0.3	0.4	0.25	0.484394	Basalt
2066	9900	125.904	-14.7254	0.3	0.25	-0.05	0.2	0	0.3	0.5	0.75	0.484719	Basalt
3622	900	126.465	-14.3224	0.1	0.5	0.4	0.4	0	-0.4	0.5	0.5	0.484781	Basalt
386	21600	125.016	-15.1081	0	0	0	0.2	0	-0.2	0.2	0	0.485191	Basalt
4154	49500	126.465	-14.1619	0.2	0.75	0.55	0.3	0	-0.3	0.5	0.75	0.485437	Sandstone
1315	900	125.979	-14.8258	0.1	1	0.9	0.6	0	-0.6	0.6	1	0.48584	Sandstone
949	25200	125.421	-14.9594	0	0.25	0.25	0.2	0	-0.2	0.2	0.25	0.486001	Sandstone
4015	10800	126.167	-14.1373	0.1	0.5	0.4	0.3	0	-0.3	0.4	0.5	0.486015	Basalt
1446	900	125.223	-14.7495	0	0	0	0	0	0.25	0	0.25	0.48619	Sandstone
2737	13500	126.062	-14.5433	0	1	1	0.8	0	-0.3	0.8	1	0.48622	Coastal
3776	1800	126.452	-14.2785	0.2	0.5	0.3	0.4	0	-0.4	0.6	0.5	0.486263	Basalt
2381	1800	125.75	-14.577	0.4	0.75	0.35	0.3	0	-0.3	0.6	0.75	0.486607	Basalt
2793	9000	126.151	-14.5316	0.1	0.75	0.65	0.5	0	-0.5	0.6	0.75	0.487263	Basalt
2487	1800	125.824	-14.5633	0.2	0.25	0.05	0.2	0	0.05	0.4	0.5	0.487343	Basalt
3878	4500	126.557	-14.2607	0.2	1	0.8	0.2	0	-0.2	0.4	1	0.487549	Alluvium and colluvium
3436	2700	126.085	-14.2514	0	0.25	0.25	0.3	0	-0.3	0.3	0.25	0.487609	Sandstone
383	1800	125.012	-15.1072	0	0	0	0.3	0	-0.3	0.3	0	0.487782	Basalt
4158	900	126.427	-14.159	0.3	0.25	-0.05	0.3	0	-0.3	0.6	0.25	0.487792	Sandstone
193	2700	125.238	-15.197	0.1	0	-0.1	0.1	0	0.15	0.2	0.25	0.48826	Sandstone
3817	900	126.452	-14.2648	0.2	0.75	0.55	0.4	0	-0.15	0.6	1	0.488403	Basalt
3603	900	126.27	-14.2879	0.1	0.5	0.4	0.4	0	-0.15	0.5	0.5	0.489018	Sandstone
4001	7200	126.17	-14.155	0.1	0.5	0.4	0.3	0	-0.3	0.4	0.5	0.489705	Sandstone
4850	4500	126.186	-14.0327	0.1	0.5	0.4	0.1	0	-0.1	0.2	0.5	0.490034	Basalt
1591	1800	125.654	-14.7173	0.2	0	-0.2	0.1	0	0.15	0.3	0.25	0.490912	Sandstone
4449	11700	126.059	-14.051	0	0	0	0	0	0	0	0	0.491258	Laterite
2095	2700	125.908	-14.6969	0.3	0.25	-0.05	0.2	0	0.05	0.5	0.5	0.492356	Basalt
4097	3600	126.485	-14.2254	0.2	0.75	0.55	0.3	0	-0.3	0.5	0.75	0.493157	Basalt
4275	92700	125.999	-14.0211	0	0	0	0	0	0	0	0	0.493359	Basalt
3770	9900	126.475	-14.2797	0.2	0.75	0.55	0.3	0	-0.3	0.5	0.75	0.493684	Laterite
2904	187200	125.988	-14.3737	0	0	0	0	0	0	0	0	0.493805	Coastal
1094	15300	125.251	-14.8452	0	0	0	0.3	0	-0.05	0.3	0.25	0.494271	Sandstone
4357	126000	126.023	-14.0729	0	0	0	0	0	0	0	0	0.494344	Laterite
3266	11700	126.095	-14.3608	0	0.25	0.25	0.3	0	-0.05	0.3	0.25	0.495144	Sandstone
4781	1800	126.14	-14.0579	0	0.25	0.25	0.1	0	-0.1	0.1	0.25	0.496418	Laterite
474	5400	125.094	-15.0761	0	0	0	0.3	0	-0.05	0.3	0.25	0.496485	Basalt
751	56700	125.415	-15.003	0	0	0	0.3	0	-0.3	0.3	0	0.497568	Coastal
1000	2700	125.464	-14.9217	0	0.5	0.5	0.4	0	-0.4	0.4	0.5	0.498477	Sandstone
2577	900	125.967	-14.5585	0	0	0	0	0	0.25	0	0.25	0.498574	Sandstone
2134	3600	125.908	-14.6747	0.3	0.25	-0.05	0.1	0	0.15	0.4	0.5	0.498779	Basalt
3341	900	126.031	-14.3279	0	0	0	0.1	0	0.15	0.1	0.25	0.498782	Basalt
1756	48600	125.886	-14.6893	0.2	0.25	0.05	0.3	0	-0.3	0.5	0.25	0.498912	Laterite
2404	900	125.83	-14.6179	0.3	0.5	0.2	0.4	0	-0.15	0.7	0.75	0.499021	Basalt
1723	3600	125.827	-14.6935	0.2	0.25	0.05	0.3	0	-0.3	0.4	0.25	0.499156	Basalt
5146	207000	126.065	-13.943	0	0	0	0.1	0	-0.1	0.1	0	0.499681	Basalt
4792	23400	126.155	-14.0511	0.1	0.5	0.4	0.1	0	-0.1	0.2	0.5	0.49985	Laterite
2072	15300	125.892	-14.7089	0.3	0.5	0.2	0.3	0	-0.05	0.5	0.75	0.50006	Basalt
1197	5400	125.7	-14.8238	0.2	0.25	0.05	0.2	1	0.55	0.4	1	0.500149	Sandstone
5145	37800	126.041	-13.9405	0	0	0	0.1	0	-0.1	0.1	0	0.500409	Laterite
4114	7200	126.488	-14.2209	0.2	0.5	0.3	0.3	0	-0.3	0.5	0.5	0.500695	Basalt
2316	2700	125.097	-14.6284	0	0	0	0	0	0.25	0	0.25	0.500881	Basalt
2441	3600	125.83	-14.6118	0.3	0.5	0.2	0.4	0	-0.15	0.7	0.75	0.501153	Basalt
[truncated: 3,064 more rows]
